# Supplementary material
Source: publisher figshare collection journal article supplement (https://acs.figshare.com/ndownloader/files/8898550)

## *Supporting Information*

### **Discovery of Potent and Selective Inhibitors of Cdc2-like Kinase**

#### **1 (CLK1) as a New Class of Autophagy Inducers**

Qi-Zheng Sun,<sup>†,⊥</sup> Gui-Feng Lin,<sup>†,⊥</sup> Lin-Li Li,<sup>‡,⊥</sup> Xi-Ting Jin,<sup>‡</sup> Lu-Yi Huang,<sup>†,§</sup> Guo Zhang,<sup>‡</sup> Wei Yang,<sup>‡</sup> Kai Chen,<sup>†</sup> Rong Xiang,<sup>||</sup> Chong Chen,<sup>†</sup> Yu-Quan Wei,<sup>†</sup> Guang-Wen Lu,<sup>\*,†</sup> and Sheng-Yong Yang<sup>\*,†,§</sup>

<sup>†</sup>State Key Laboratory of Biotherapy and Cancer Center, West China Hospital, Sichuan University, and Collaborative Innovation Center for Biotherapy, Chengdu, 610041, PR China.

<sup>‡</sup>Key Laboratory of Drug Targeting and Drug Delivery System of Ministry of Education, West China School of Pharmacy, Sichuan University, Sichuan 610041, China.

<sup>§</sup>School of Chemical Engineering, Sichuan University, and Collaborative Innovation Center for Biotherapy, Chengdu, 610041, PR China.

<sup>||</sup>Department of Clinical Medicine, School of Medicine, Nankai University, Tianjin 300071, China.

#### **Table of Contents:**

|                                                                                                                                                     |     |
|-----------------------------------------------------------------------------------------------------------------------------------------------------|-----|
| <b>Table S1.</b> Kinase inhibition profile of compound <b>25</b> .....                                                                              | S3  |
| <b>Table S2.</b> Crystallographic data collection and refinement statistics .....                                                                   | S8  |
| <b>Figure S1.</b> Virtual screening led to the discovery of hit compound .....                                                                      | S9  |
| <b>Figure S2.</b> Dendrogram representation of the kinase selectivity profile of <b>25</b> . .....                                                  | S10 |
| <b>Figure S3.</b> Overview of X-ray co-crystal structure of CLK1 complexed with <b>25</b> and a 2D ligand-interaction diagram for <b>25</b> . ..... | S11 |
| <b>Figure S4.</b> Effects of <b>25</b> (20 nM and 100 nM) on the location and redistribution of SR proteins.....                                    | S12 |
| <b>Figure S5.</b> Detection of autophagy and autophagic flux induced by <b>25</b> (20 nM and 100 nM).....                                           | S13 |
| <b>Figure S6.</b> <i>In vitro</i> effects of <b>18</b> on LC3 .....                                                                                 | S14 |

|                                                                                              |     |
|----------------------------------------------------------------------------------------------|-----|
| <b>Figure S7. Pharmacokinetic characteristics of compound 25.</b>                            | S15 |
| <b>Figure S8. IC<sub>50</sub> curves of compounds 1, 9e, 25, and 25R on CLK1 and DYRK1A.</b> | S16 |
| <b>Figure S9. IC<sub>50</sub> curves of compound 25.</b>                                     | S17 |
| <b>Synthesis and Structure Confirmation of Compound 25R (the Enantiomer of Compound 25)</b>  | S24 |
| <b>Pharmacokinetic Assessments of Compound 25</b>                                            | S25 |
| <b>Copies of <sup>1</sup>H- and <sup>13</sup>C-NMR Spectra</b>                               | S26 |
| <b>Copies of MS Spectra</b>                                                                  | S55 |
| <b>HPLC Purity Analysis for Compound 25</b>                                                  | S56 |
| <b>Confirmation of Enantiomeric Purity of Compound 25</b>                                    | S57 |

**Table S1.** Kinase inhibition profile of compound **25<sup>a</sup>**

| Kinase              | IC <sub>50</sub> (nM) | Kinase            | IC <sub>50</sub> (nM) |
|---------------------|-----------------------|-------------------|-----------------------|
| Abl(h)              | >10000 <sup>b</sup>   | MARK4(h)          | >10000 <sup>b</sup>   |
| Abl (H396P) (h)     | >10000 <sup>b</sup>   | MEKK2(h)          | >10000 <sup>b</sup>   |
| Abl (M351T)(h)      | >10000 <sup>b</sup>   | MELK(h)           | >10000 <sup>b</sup>   |
| Abl (Q252H) (h)     | >10000 <sup>b</sup>   | Mer(h)            | 2972                  |
| Abl(T315I)(h)       | >10000 <sup>b</sup>   | Met(h)            | >10000 <sup>b</sup>   |
| Abl(Y253F)(h)       | >10000 <sup>b</sup>   | Met(D1246H)(h)    | >10000 <sup>b</sup>   |
| ACK1(h)             | >10000 <sup>b</sup>   | Met(D1246N)(h)    | >10000 <sup>b</sup>   |
| ALK(h)              | >10000 <sup>b</sup>   | Met(M1268T)(h)    | >10000 <sup>b</sup>   |
| ALK1(h)             | >10000 <sup>b</sup>   | Met(Y1248C)(h)    | >10000 <sup>b</sup>   |
| ALK2(h)             | >10000 <sup>b</sup>   | Met(Y1248D)(h)    | >10000 <sup>b</sup>   |
| ALK4(h)             | >10000 <sup>b</sup>   | Met(Y1248H)(h)    | >10000 <sup>b</sup>   |
| ALK6(h)             | >10000 <sup>b</sup>   | MINK(h)           | 3623                  |
| Arg(h)              | >10000 <sup>b</sup>   | MKK6(h)           | >10000 <sup>b</sup>   |
| AMPK $\alpha$ 1(h)  | >10000 <sup>b</sup>   | MKK7 $\beta$ (h)  | >10000 <sup>b</sup>   |
| AMPK $\alpha$ 2(h)  | >10000 <sup>b</sup>   | MLCK(h)           | >10000 <sup>b</sup>   |
| A-Raf(h)            | >10000 <sup>b</sup>   | MLK1(h)           | 7196                  |
| ARK5(h)             | >10000 <sup>b</sup>   | MLK2(h)           | 1260                  |
| ASK1(h)             | >10000 <sup>b</sup>   | Mnk2(h)           | >10000 <sup>b</sup>   |
| Aurora-A(h)         | >10000 <sup>b</sup>   | MOK(h)            | >10000 <sup>b</sup>   |
| Aurora-B(h)         | >10000 <sup>b</sup>   | MRCK $\alpha$ (h) | >10000 <sup>b</sup>   |
| Aurora-C(h)         | >10000 <sup>b</sup>   | MRCK $\beta$ (h)  | >10000 <sup>b</sup>   |
| Axl(h)              | >10000 <sup>b</sup>   | MSK1(h)           | 1430                  |
| Blk(h)              | 9621                  | MSK2(h)           | 266                   |
| Bmx(h)              | >10000 <sup>b</sup>   | MSSK1(h)          | >10000 <sup>b</sup>   |
| BRK(h)              | >10000 <sup>b</sup>   | MST1(h)           | >10000 <sup>b</sup>   |
| BrSK1(h)            | >10000 <sup>b</sup>   | MST2(h)           | 1265                  |
| BrSK2(h)            | >10000 <sup>b</sup>   | MST3(h)           | >10000 <sup>b</sup>   |
| BTK(h)              | >10000 <sup>b</sup>   | MST4(h)           | >10000 <sup>b</sup>   |
| BTK(R28H)(h)        | >10000 <sup>b</sup>   | mTOR(h)           | >10000 <sup>b</sup>   |
| B-Raf(h)            | >10000 <sup>b</sup>   | mTOR/FKBP12(h)    | >10000 <sup>b</sup>   |
| B-Raf(V599E)(h)     | >10000 <sup>b</sup>   | MuSK(h)           | >10000 <sup>b</sup>   |
| CaMKI(h)            | >10000 <sup>b</sup>   | MYLK2(h)          | >10000 <sup>b</sup>   |
| CaMKI $\beta$ (h)   | >10000 <sup>b</sup>   | MYO3B(h)          | >10000 <sup>b</sup>   |
| CaMKI $\gamma$ (h)  | >10000 <sup>b</sup>   | NEK1(h)           | 449                   |
| CaMKII $\alpha$ (h) | >10000 <sup>b</sup>   | NEK2(h)           | >10000 <sup>b</sup>   |
| CaMKII $\beta$ (h)  | >10000 <sup>b</sup>   | NEK3(h)           | >10000 <sup>b</sup>   |
| CaMKII $\gamma$ (h) | >10000 <sup>b</sup>   | NEK6(h)           | >10000 <sup>b</sup>   |
| CaMKI $\delta$ (h)  | >10000 <sup>b</sup>   | NEK7(h)           | >10000 <sup>b</sup>   |
| CaMKII $\delta$ (h) | >10000 <sup>b</sup>   | NEK9(h)           | >10000 <sup>b</sup>   |
| CaMKIV(h)           | >10000 <sup>b</sup>   | NIM1(h)           | >10000 <sup>b</sup>   |
| CaMKK1(h)           | >10000 <sup>b</sup>   | NEK11(h)          | 2357                  |
| CaMKK2(h)           | >10000 <sup>b</sup>   | NLK(h)            | 3273                  |

|                      |                     |                            |                     |
|----------------------|---------------------|----------------------------|---------------------|
| CDK1/cyclinB(h)      | >10000 <sup>b</sup> | NUAK2(h)                   | >10000 <sup>b</sup> |
| CDK2/cyclinA(h)      | >10000 <sup>b</sup> | p70S6K(h)                  | 546                 |
| CDK2/cyclinE(h)      | >10000 <sup>b</sup> | PAK1(h)                    | >10000 <sup>b</sup> |
| CDK3/cyclinE(h)      | >10000 <sup>b</sup> | PAK2(h)                    | >10000 <sup>b</sup> |
| CDK4/cyclinD3(h)     | >10000 <sup>b</sup> | PAK4(h)                    | >10000 <sup>b</sup> |
| CDK5/p25(h)          | >10000 <sup>b</sup> | PAK3(h)                    | >10000 <sup>b</sup> |
| CDK5/p35(h)          | >10000 <sup>b</sup> | PAK5(h)                    | >10000 <sup>b</sup> |
| CDK6/cyclinD3(h)     | >10000 <sup>b</sup> | PAK6(h)                    | >10000 <sup>b</sup> |
| CDK7/cyclinH/MAT1(h) | >10000 <sup>b</sup> | PAR-1B $\alpha$ (h)        | >10000 <sup>b</sup> |
| CDK9/cyclin T1(h)    | 1428                | PASK(h)                    | 154                 |
| ChaK1(h)             | >10000 <sup>b</sup> | PEK(h)                     | >10000 <sup>b</sup> |
| CHK1(h)              | >10000 <sup>b</sup> | PDGFR $\alpha$ (h)         | >10000 <sup>b</sup> |
| CHK2(h)              | >10000 <sup>b</sup> | PDGFR $\alpha$ (D842V)(h)  | 5342                |
| CHK2(I157T)(h)       | >10000 <sup>b</sup> | PDGFR $\alpha$ (V561D)(h)  | >10000 <sup>b</sup> |
| CHK2(R145W)(h)       | >10000 <sup>b</sup> | PDGFR $\beta$ (h)          | >10000 <sup>b</sup> |
| CK1 $\gamma$ 1(h)    | >10000 <sup>b</sup> | PDHK4(h)                   | >10000 <sup>b</sup> |
| CK1 $\gamma$ 2(h)    | >10000 <sup>b</sup> | PDK1(h)                    | >10000 <sup>b</sup> |
| CK1 $\gamma$ 3(h)    | >10000 <sup>b</sup> | PhK $\gamma$ 2(h)          | >10000 <sup>b</sup> |
| CK1 $\delta$ (h)     | >10000 <sup>b</sup> | Pim-1(h)                   | 3505                |
| CK2(h)               | >10000 <sup>b</sup> | Pim-2(h)                   | >10000 <sup>b</sup> |
| CK2 $\alpha$ 1(h)    | >10000 <sup>b</sup> | Pim-3(h)                   | >10000 <sup>b</sup> |
| CK2 $\alpha$ 2(h)    | >10000 <sup>b</sup> | PKA(h)                     | 549                 |
| CLIK1(h)             | 1164                | PKA $\epsilon$ $\beta$ (h) | 1153                |
| CLK1(h)              | 2                   | PKB $\alpha$ (h)           | 4132                |
| CLK2(h)              | 31                  | PKB $\beta$ (h)            | >10000 <sup>b</sup> |
| CLK3(h)              | 5590                | PKB $\gamma$ (h)           | 1908                |
| CLK4(h)              | 8                   | PKC $\alpha$ (h)           | 6565                |
| cKit(h)              | >10000 <sup>b</sup> | PKC $\beta$ I(h)           | 1343                |
| cKit(D816V)(h)       | >10000 <sup>b</sup> | PKC $\beta$ II(h)          | >10000 <sup>b</sup> |
| cKit(D816H)(h)       | >10000 <sup>b</sup> | PKC $\gamma$ (h)           | >10000 <sup>b</sup> |
| cKit(V560G)(h)       | >10000 <sup>b</sup> | PKC $\delta$ (h)           | >10000 <sup>b</sup> |
| cKit(V654A)(h)       | >10000 <sup>b</sup> | PKC $\epsilon$ (h)         | >10000 <sup>b</sup> |
| CSK(h)               | >10000 <sup>b</sup> | PKC $\eta$ (h)             | >10000 <sup>b</sup> |
| c-RAF(h)             | >10000 <sup>b</sup> | PKC $\iota$ (h)            | >10000 <sup>b</sup> |
| cSRC(h)              | >10000 <sup>b</sup> | PKC $\mu$ (h)              | >10000 <sup>b</sup> |
| DAPK1(h)             | >10000 <sup>b</sup> | PKC $\theta$ (h)           | 2629                |
| DAPK2(h)             | >10000 <sup>b</sup> | PKC $\zeta$ (h)            | >10000 <sup>b</sup> |
| DCAMKL2(h)           | >10000 <sup>b</sup> | PKD2(h)                    | >10000 <sup>b</sup> |
| DCAMKL3(h)           | >10000 <sup>b</sup> | PKD3(h)                    | >10000 <sup>b</sup> |
| DDR1(h)              | >10000 <sup>b</sup> | PKG1 $\alpha$ (h)          | 807                 |
| DDR2(h)              | >10000 <sup>b</sup> | PKG1 $\beta$ (h)           | 248                 |
| DMPK(h)              | >10000 <sup>b</sup> | PKR(h)                     | >10000 <sup>b</sup> |
| DRAK1(h)             | >10000 <sup>b</sup> | Plk1(h)                    | >10000 <sup>b</sup> |
| DYRK1A(h)            | 138                 | Plk3(h)                    | >10000 <sup>b</sup> |

|                      |                     |                  |                     |
|----------------------|---------------------|------------------|---------------------|
| DYRK1B(h)            | 690                 | PRAK(h)          | >10000 <sup>b</sup> |
| DYRK2(h)             | >10000 <sup>b</sup> | PRKG2(h)         | 344                 |
| DYRK3(h)             | 4976                | PRK2(h)          | 229                 |
| eEF-2K(h)            | >10000 <sup>b</sup> | PrKX(h)          | >10000 <sup>b</sup> |
| EGFR(h)              | >10000 <sup>b</sup> | PTK5(h)          | >10000 <sup>b</sup> |
| EGFR(L858R)(h)       | >10000 <sup>b</sup> | Pyk2(h)          | >10000 <sup>b</sup> |
| EGFR(L861Q)(h)       | >10000 <sup>b</sup> | Ret(h)           | >10000 <sup>b</sup> |
| EGFR(T790M)(h)       | >10000 <sup>b</sup> | Ret (V804L)(h)   | >10000 <sup>b</sup> |
| EGFR(T790M,L858R)(h) | 4818                | Ret(V804M)(h)    | >10000 <sup>b</sup> |
| EphA1(h)             | >10000 <sup>b</sup> | RIPK2(h)         | 3571                |
| EphA2(h)             | >10000 <sup>b</sup> | ROCK-I(h)        | >10000 <sup>b</sup> |
| EphA3(h)             | >10000 <sup>b</sup> | ROCK-II(h)       | >10000 <sup>b</sup> |
| EphA4(h)             | >10000 <sup>b</sup> | Ron(h)           | >10000 <sup>b</sup> |
| EphA5(h)             | >10000 <sup>b</sup> | Ros(h)           | 1071                |
| EphA7(h)             | >10000 <sup>b</sup> | Rse(h)           | >10000 <sup>b</sup> |
| EphA8(h)             | >10000 <sup>b</sup> | Rsk1(h)          | >10000 <sup>b</sup> |
| EphB2(h)             | >10000 <sup>b</sup> | Rsk2(h)          | >10000 <sup>b</sup> |
| EphB1(h)             | >10000 <sup>b</sup> | Rsk3(h)          | >10000 <sup>b</sup> |
| EphB3(h)             | >10000 <sup>b</sup> | Rsk4(h)          | >10000 <sup>b</sup> |
| EphB4(h)             | >10000 <sup>b</sup> | SAPK2a(h)        | >10000 <sup>b</sup> |
| ErbB2(h)             | >10000 <sup>b</sup> | SAPK2a(T106M)(h) | >10000 <sup>b</sup> |
| ErbB4(h)             | >10000 <sup>b</sup> | SAPK2b(h)        | >10000 <sup>b</sup> |
| FAK(h)               | >10000 <sup>b</sup> | SAPK3(h)         | >10000 <sup>b</sup> |
| Fer(h)               | >10000 <sup>b</sup> | SAPK4(h)         | >10000 <sup>b</sup> |
| Fes(h)               | >10000 <sup>b</sup> | SGK(h)           | >10000 <sup>b</sup> |
| FGFR1(h)             | >10000 <sup>b</sup> | SGK2(h)          | >10000 <sup>b</sup> |
| FGFR1(V561M)(h)      | >10000 <sup>b</sup> | SGK3(h)          | >10000 <sup>b</sup> |
| FGFR2(h)             | >10000 <sup>b</sup> | SIK(h)           | >10000 <sup>b</sup> |
| FGFR2(N549H)(h)      | >10000 <sup>b</sup> | SIK2(h)          | >10000 <sup>b</sup> |
| FGFR3(h)             | >10000 <sup>b</sup> | SIK3(h)          | >10000 <sup>b</sup> |
| FGFR4(h)             | >10000 <sup>b</sup> | SLK(h)           | >10000 <sup>b</sup> |
| Fgr(h)               | >10000 <sup>b</sup> | Snk(h)           | >10000 <sup>b</sup> |
| Flt1(h)              | >10000 <sup>b</sup> | SNRK(h)          | >10000 <sup>b</sup> |
| Flt3(D835Y)(h)       | >10000 <sup>b</sup> | Src(1-530)(h)    | >10000 <sup>b</sup> |
| Flt3(h)              | 5283                | Src(T341M)(h)    | >10000 <sup>b</sup> |
| Flt4(h)              | >10000 <sup>b</sup> | SRPK1(h)         | >10000 <sup>b</sup> |
| Fms(h)               | >10000 <sup>b</sup> | SRPK2(h)         | >10000 <sup>b</sup> |
| Fms(Y969C)(h)        | >10000 <sup>b</sup> | STK25(h)         | >10000 <sup>b</sup> |
| Fyn(h)               | >10000 <sup>b</sup> | STK33(h)         | >10000 <sup>b</sup> |
| GCK(h)               | >10000 <sup>b</sup> | Syk(h)           | >10000 <sup>b</sup> |
| GCN2(h)              | >10000 <sup>b</sup> | TAK1(h)          | >10000 <sup>b</sup> |
| GRK1(h)              | >10000 <sup>b</sup> | TAO1(h)          | 1154                |
| GRK2(h)              | >10000 <sup>b</sup> | TAO2(h)          | 1689                |
| GRK3(h)              | >10000 <sup>b</sup> | TAO3(h)          | 1205                |

|                      |                     |                                                      |                     |
|----------------------|---------------------|------------------------------------------------------|---------------------|
| GRK5(h)              | >10000 <sup>b</sup> | TBK1(h)                                              | >10000 <sup>b</sup> |
| GRK6(h)              | >10000 <sup>b</sup> | Tec(h) activated                                     | >10000 <sup>b</sup> |
| GRK7(h)              | >10000 <sup>b</sup> | TGFBR1(h)                                            | >10000 <sup>b</sup> |
| GSK3 $\alpha$ (h)    | 418                 | Tie2 (h)                                             | >10000 <sup>b</sup> |
| GSK3 $\beta$ (h)     | 1594                | Tie2(R849W)(h)                                       | >10000 <sup>b</sup> |
| Hck(h)               | >10000 <sup>b</sup> | Tie2(Y897S)(h)                                       | >10000 <sup>b</sup> |
| Hck(h) activated     | >10000 <sup>b</sup> | TLK1(h)                                              | >10000 <sup>b</sup> |
| HIPK1(h)             | >10000 <sup>b</sup> | TLK2(h)                                              | >10000 <sup>b</sup> |
| HIPK2(h)             | >10000 <sup>b</sup> | TNIK(h)                                              | 1969                |
| HIPK3(h)             | >10000 <sup>b</sup> | TrkA(h)                                              | 179                 |
| HIPK4(h)             | 748                 | TrkB(h)                                              | 457                 |
| HPK1(h)              | >10000 <sup>b</sup> | TrkC(h)                                              | 526                 |
| ICK(h)               | >10000 <sup>b</sup> | TSSK1(h)                                             | >10000 <sup>b</sup> |
| IGF-1R(h)            | >10000 <sup>b</sup> | TSSK2(h)                                             | >10000 <sup>b</sup> |
| IGF-1R(h), activated | >10000 <sup>b</sup> | TSSK3(h)                                             | >10000 <sup>b</sup> |
| IKK $\alpha$ (h)     | >10000 <sup>b</sup> | TSSK4(h)                                             | >10000 <sup>b</sup> |
| IKK $\beta$ (h)      | >10000 <sup>b</sup> | TTBK1(h)                                             | >10000 <sup>b</sup> |
| IKK $\epsilon$ (h)   | >10000 <sup>b</sup> | TTBK2(h)                                             | >10000 <sup>b</sup> |
| IR(h)                | >10000 <sup>b</sup> | TTK(h)                                               | >10000 <sup>b</sup> |
| IR(h), activated     | >10000 <sup>b</sup> | Txk(h)                                               | 8500                |
| IRE1(h)              | >10000 <sup>b</sup> | TYK2(h)                                              | 3700                |
| IRR(h)               | 220                 | ULK1(h)                                              | >10000 <sup>b</sup> |
| IRAK1(h)             | 4450                | ULK2(h)                                              | >10000 <sup>b</sup> |
| IRAK4(h)             | 1516                | ULK3(h)                                              | >10000 <sup>b</sup> |
| Itk(h)               | 4582                | Wee1(h)                                              | >10000 <sup>b</sup> |
| JAK1(h)              | >10000 <sup>b</sup> | WNK2(h)                                              | >10000 <sup>b</sup> |
| JAK2(h)              | >10000 <sup>b</sup> | WNK3(h)                                              | >10000 <sup>b</sup> |
| JAK3(h)              | >10000 <sup>b</sup> | VRK2(h)                                              | >10000 <sup>b</sup> |
| JNK1 $\alpha$ 1(h)   | >10000 <sup>b</sup> | Yes(h)                                               | >10000 <sup>b</sup> |
| JNK2 $\alpha$ 2(h)   | >10000 <sup>b</sup> | ZAK(h)                                               | >10000 <sup>b</sup> |
| JNK3(h)              | >10000 <sup>b</sup> | ZAP-70(h)                                            | >10000 <sup>b</sup> |
| KDR(h)               | >10000 <sup>b</sup> | ZIPK(h)                                              | >10000 <sup>b</sup> |
| Lck(h)               | >10000 <sup>b</sup> | ATM(h)                                               | 279                 |
| Lck(h) activated     | >10000 <sup>b</sup> | ATR/ATRIP(h)                                         | >10000 <sup>b</sup> |
| LIMK1(h)             | >10000 <sup>b</sup> | DNA-PK(h)                                            | 412                 |
| LKB1(h)              | >10000 <sup>b</sup> | PI3 Kinase (p110 $\beta$ /p85 $\alpha$ )(h)          | 1606                |
| LOK(h)               | >10000 <sup>b</sup> | PI3 Kinase (p120 $\gamma$ )(h)                       | 1745                |
| Lyn(h)               | >10000 <sup>b</sup> | PI3 Kinase (p110 $\delta$ /p85 $\alpha$ )(h)         | 1212                |
| LRRK2(h)             | >10000 <sup>b</sup> | PI3 Kinase (p110 $\alpha$ /p85 $\alpha$ )(h)         | 2023                |
| LTK(h)               | >10000 <sup>b</sup> | PI3 Kinase (p110 $\alpha$ (E542K)/p85 $\alpha$ )(h)  | 6569                |
| MAPK1(h)             | >10000 <sup>b</sup> | PI3 Kinase (p110 $\alpha$ (H1047R)/p85 $\alpha$ )(h) | 1026                |
| MAPK2(h)             | >10000 <sup>b</sup> | PI3 Kinase (p110 $\alpha$ (E545K)/p85 $\alpha$ )(h)  | 2793                |
| MAP4K4(h)            | >10000 <sup>b</sup> | PI3 Kinase (p110 $\alpha$ /p65 $\alpha$ )(h)         | 2541                |
| MAP4K5(h)            | >10000 <sup>b</sup> | PI3KC2 $\alpha$ (h)                                  | >10000 <sup>b</sup> |

|              |                     |            |                     |
|--------------|---------------------|------------|---------------------|
| MAPKAP-K2(h) | >10000 <sup>b</sup> | PI3KC2γ(h) | 362                 |
| MAPKAP-K3(h) | >10000 <sup>b</sup> | PIP4K2α(h) | >10000 <sup>b</sup> |
| MEK1(h)      | >10000 <sup>b</sup> | PIP5K1α(h) | >10000 <sup>b</sup> |
| MEK2(h)      | >10000 <sup>b</sup> | PIP5K1γ(h) | >10000 <sup>b</sup> |
| MARK1(h)     | >10000 <sup>b</sup> |            |                     |

<sup>a</sup>IC<sub>50</sub> values were determined using the KinaseProfiler of Eurofins. In case of CLKs and DYRKs, the data represent the mean values of two independent experiments. In other cases, the data represent the results of a single experiment. [ATP] = 10 μM.

<sup>b</sup>Inhibition% @ 10 μM was lower than 50%. [ATP] = 10 μM. For detailed protocols, see <http://www.eurofins.com/pharmadiscovery>.

**Table S2.** Crystallographic data collection and refinement statistics<sup>a</sup>

| CLK1 + compound <b>25</b>                           |                         |
|-----------------------------------------------------|-------------------------|
| PDB ID                                              | 5X8I                    |
| <b>Data collection</b>                              |                         |
| Space group                                         | P65                     |
| Cell dimension                                      |                         |
| <i>a</i> , <i>b</i> , <i>c</i> (Å)                  | 68.33, 68.33, 285.72    |
| $\alpha$ , $\beta$ , $\gamma$ (°)                   | 90, 90, 120             |
| Resolution (Å) <sup>a</sup>                         | 50.00 -1.90 (1.97-1.90) |
| <i>R</i> <sub>merge</sub>                           | 0.086 (0.431)           |
| <i>I</i> / $\sigma$ <sup>1a</sup>                   | 30.72 (8.07)            |
| Completeness (%) <sup>a</sup>                       | 99.7 (100.0)            |
| Redundancy <sup>a</sup>                             | 15.9 (15.9)             |
| <b>Refinement</b>                                   |                         |
| Resolution (Å)                                      | 33.60-1.90              |
| No. reflections                                     | 58718                   |
| <i>R</i> <sub>work</sub> / <i>R</i> <sub>free</sub> | 0.166/0.206             |
| No. atoms                                           |                         |
| Protein                                             | 5386                    |
| Ligand/ion                                          | 62                      |
| Water                                               | 630                     |
| <i>B</i> -factors                                   |                         |
| Protein                                             | 23.96                   |
| Ligand/ion                                          | 18.37                   |
| Water                                               | 35.03                   |
| R.m.s. deviations                                   |                         |
| Bond lengths (Å)                                    | 0.007                   |
| Bond angles (°)                                     | 1.129                   |
| Ramachandran analysis                               |                         |
| Favored (%)                                         | 97.4                    |
| Allowed (%)                                         | 2.6                     |
| Outliers(%)                                         | 0.0                     |

<sup>a</sup> Values for the outmost resolution shell are given in parentheses.



**Figure S1.** Virtual screening led to the discovery of hit compound<sup>a</sup>

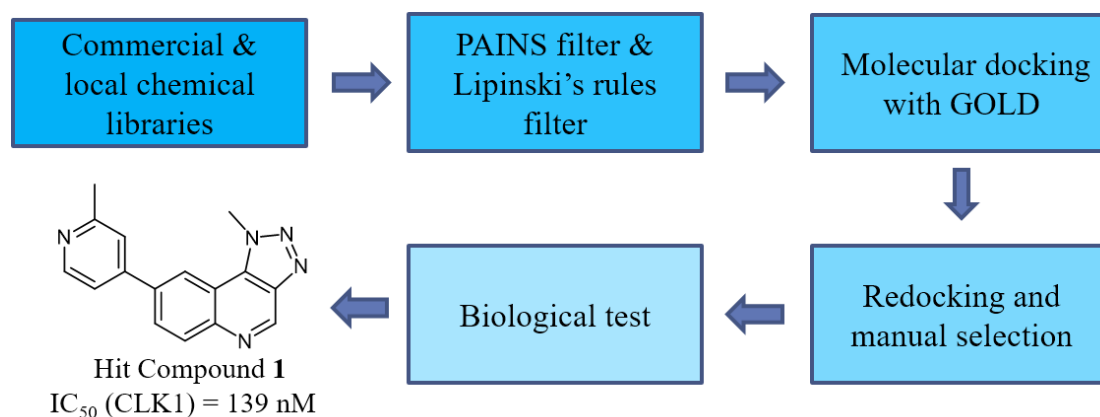

<sup>a</sup>To identify new CLK1 inhibitors as autophagy inducers, we first of all performed a virtual screening against various commercial chemical libraries including Chemdiv, Specs, Enamine, Pharmakon, Selleck, and MCE, as well as our in-house chemical library. Before the virtual screening, all the compound databases were filtered by Lipinski's rules of five, and the "pan-assay interference compounds" (PAINS) were also removed. The receptor structure was taken from the crystal structure of CLK1 (PDB ID 1Z57). The preparation and pre-process of receptor and ligand were made on the platform of Discovery Studio 3.1 (Accelrys Inc., San Diego, CA, USA). The CHARMM force field was used. The binding pocket was defined as a sphere with a radius of 9 Å, an area large enough to cover the ATP-binding region at the catalytic site. The GOLD version 5.1 program (CCDC, Cambridge, UK) was adopted for the molecular docking. GoldScore incorporated into the GOLD program package was employed to evaluate and rank the binding poses. After finishing the first round of docking, top 1% of the docking-ranked molecules were re-docked on a more flexible condition. Finally, high-ranking candidates were carefully selected for biological assays, which led to the discovery of the hit compound **1**.

**Figure S2.** Dendrogram representation of the kinase selectivity profile of **25**. The figure was generated using KinomeRender 1.4 (<http://bcb.med.usherbrooke.ca/kinomerenderLig.php>).

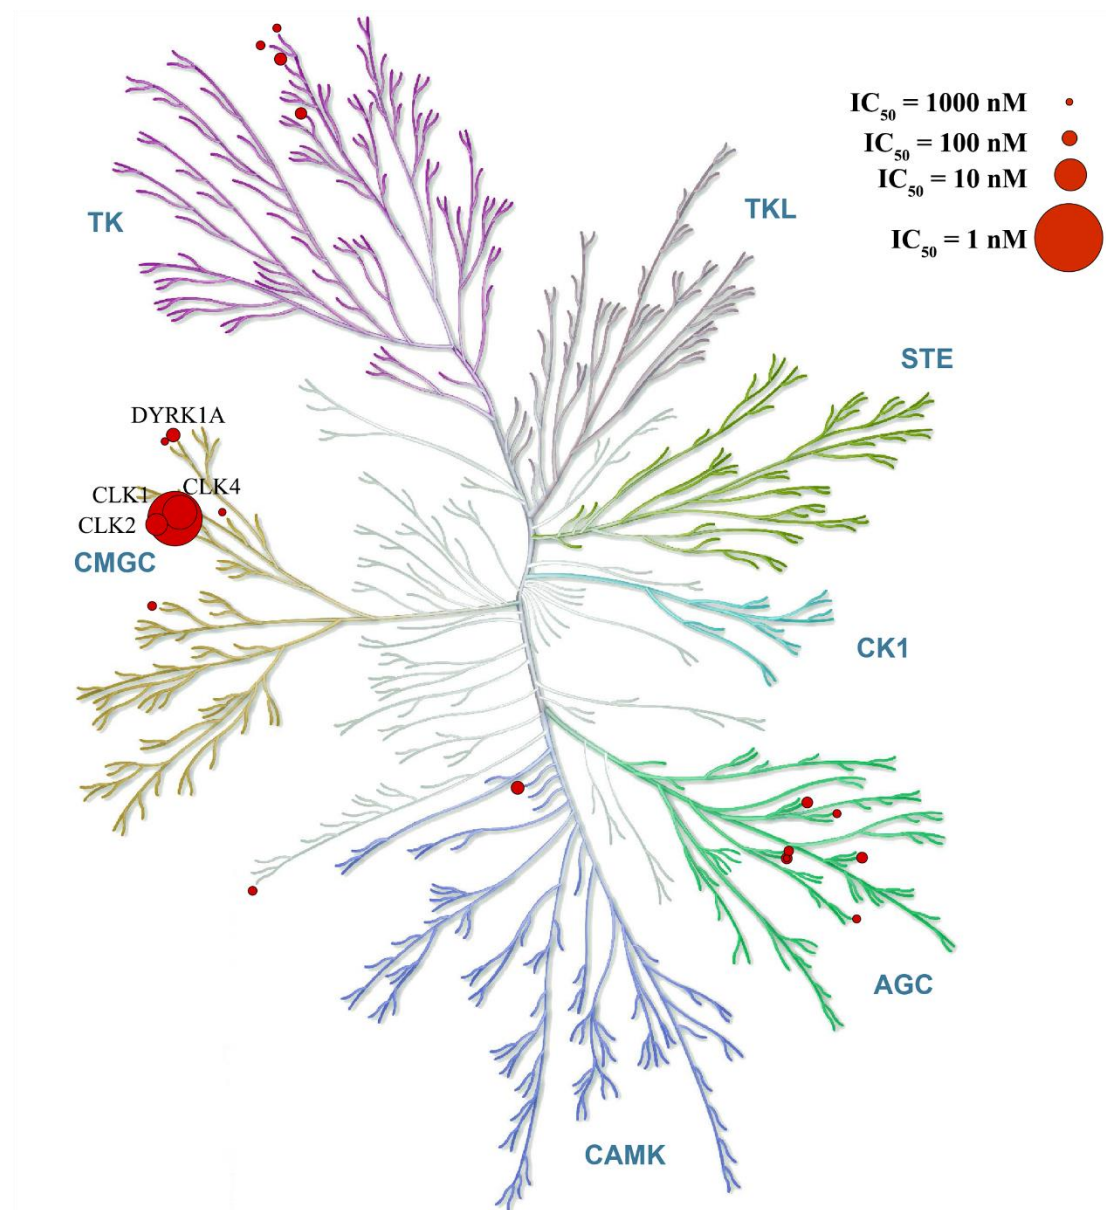

**Figure S3.** (A) Overview of X-ray co-crystal structure of CLK1 in complex with **25**. (B) A 2D ligand-interaction diagram for **25**. The ligand-interaction plot was generated using maestro 10.

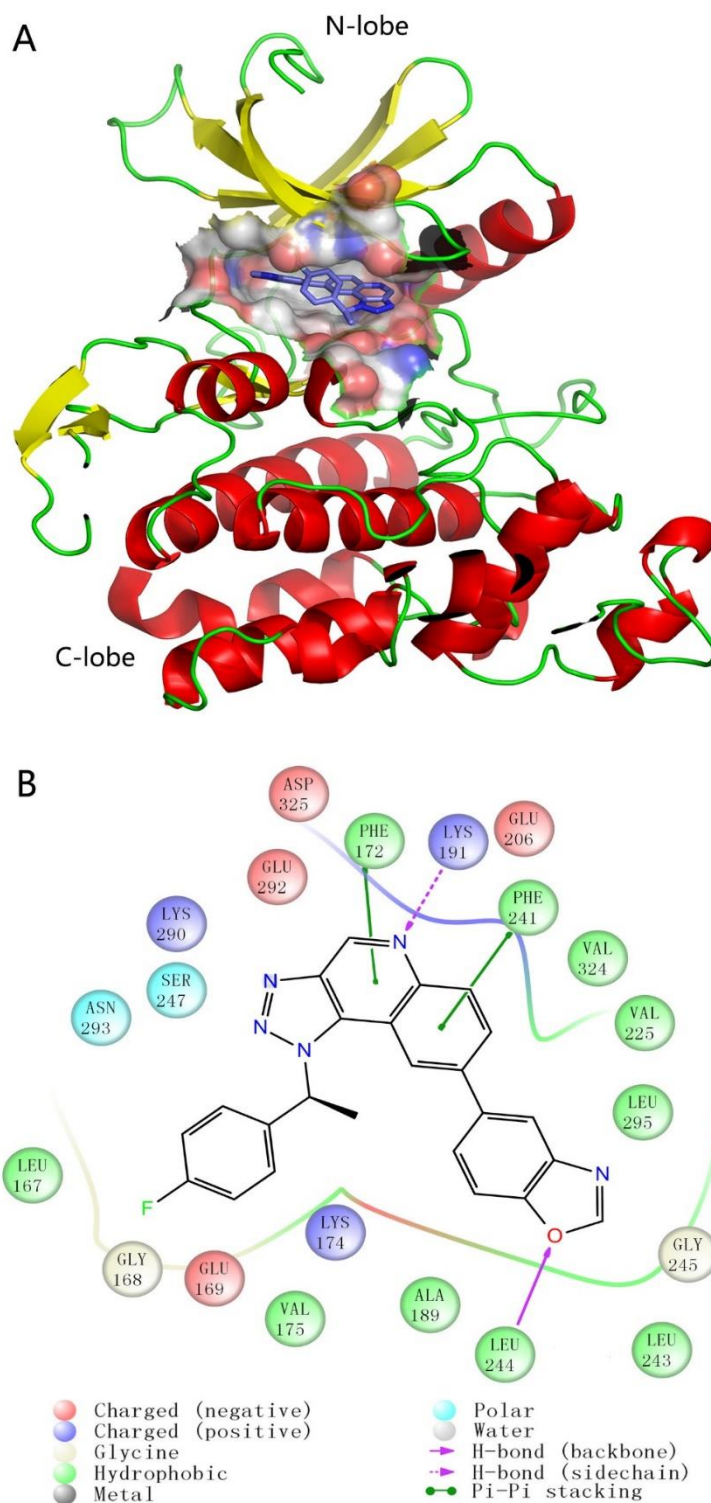

**Figure S4.** Effects of **25** (20 nM and 100 nM) on the location and redistribution of SR proteins. BNL CL.2 cells treated with DMSO (0.1%) or **25** (20 nM and 100 nM) for 24 h were fixed and probed with anti-SR proteins antibody (mAb1H4G7). Diffuse staining and typical speckles demonstrated by mAb1H4G7 represent active and stored forms of SR proteins respectively. DAPI was used to dye the nucleus. Scale bar: 10  $\mu$ m.

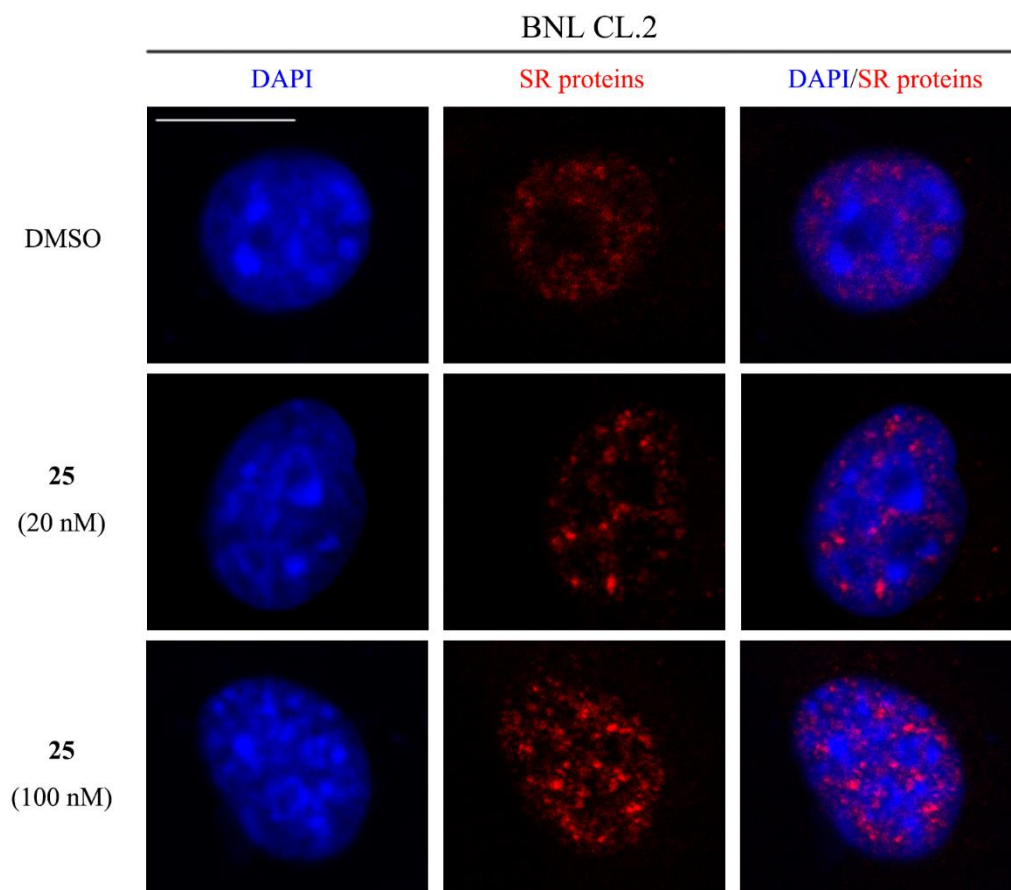

**Figure S5.** Detection of autophagy and autophagic flux induced by **25** (20 nM and 100 nM) in SKOV-3 cells<sup>a</sup>

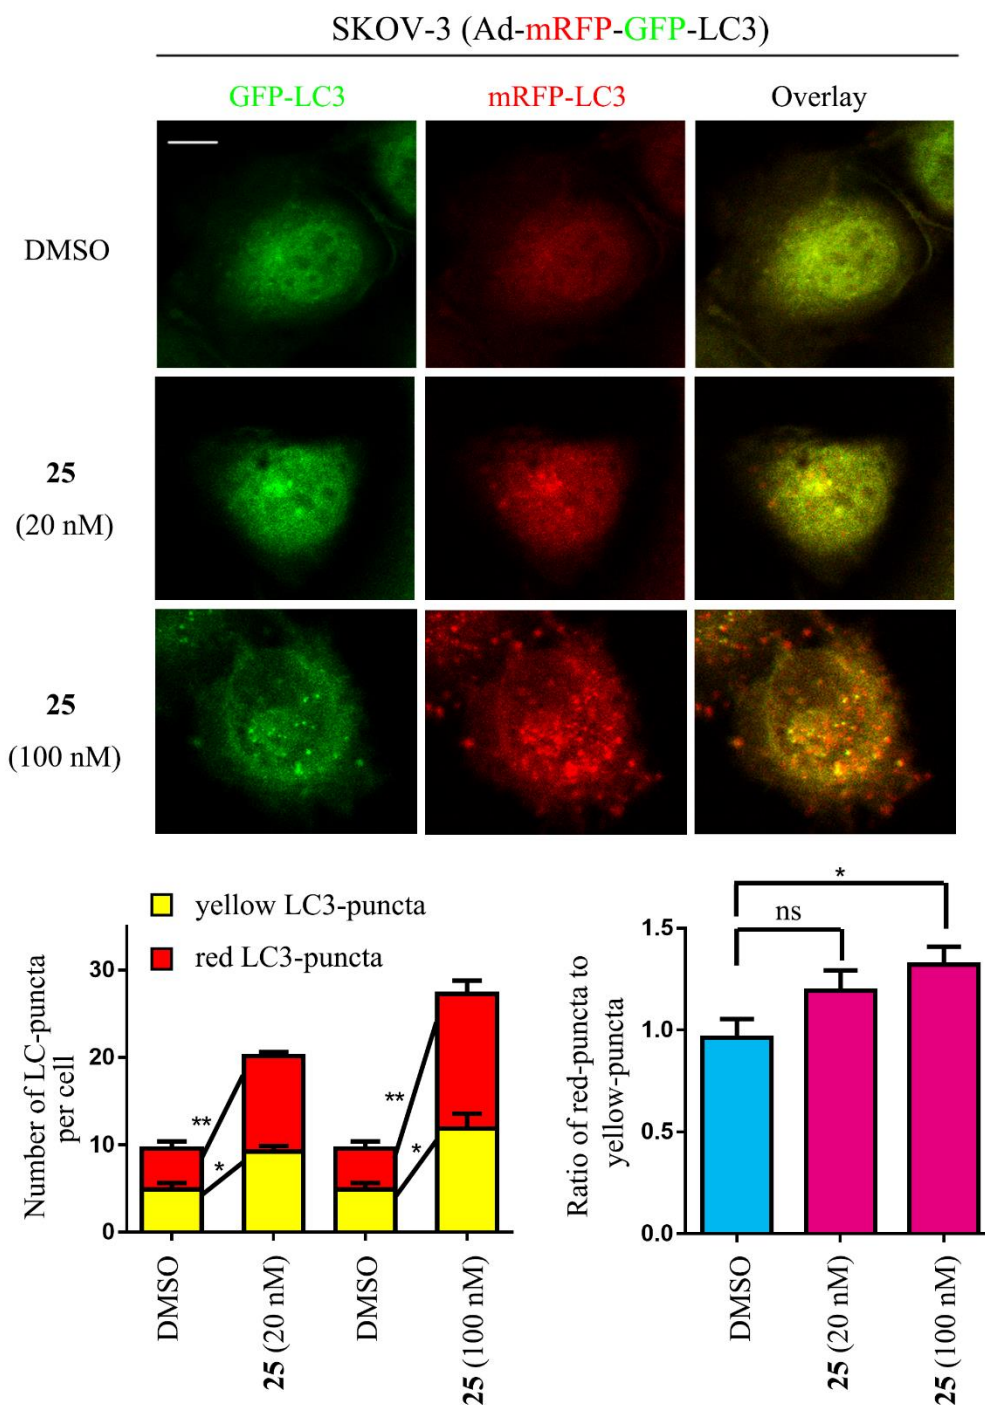

<sup>a</sup>Ad-mRFP-GFP-LC3-infected SKOV-3 cells were treated with DMSO or **25** (20 nM and 100 nM) for 24 h and fixed before examination by confocal microscopy. Representative photographs are presented. Scale bar: 10  $\mu$ m. Alignment of green and red signals appears yellow. The number of LC3-puncta (mean  $\pm$  SEM) in overlays was quantified and is shown below. More than 90 cells were counted in each individual experiment ( $n = 3$ ). \*  $P < 0.05$ , \*\*  $P < 0.01$ ; ns, no statistical significance.

**Figure S6.** *In vitro* effects of **18** on LC3. SKOV-3 cells were treated with DMSO, **25** (the positive control, 10  $\mu$ M) or **18** (10  $\mu$ M) for 24 h. Then whole cell lysates were subjected to immunoblot assay to detect LC3.

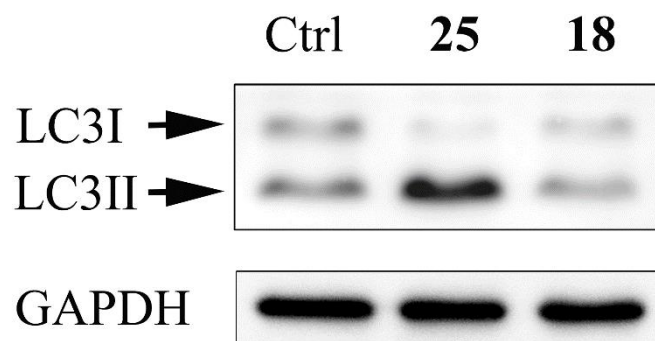

**Figure S7.** Pharmacokinetic characteristics of compound **25**. (A) Plasma concentration–time curve of **25** in SD rats after a single intravenous dose of 10 mg/kg. Blood was collected at indicated time points (0.03, 0.08, 0.25, 0.5, 1, 2, 3, 4, 6, 8, 12 h), and the plasma concentrations were determined by LC-MS. Points, mean; bars, SEM; n = 6. Pharmacokinetic parameters of **25** (iv) is shown in the right panel. (B) Plasma concentration–time curve of **25** in SD rats after a single intraperitoneal dose of 10 mg/kg. Blood was collected at indicated time points (0.16, 0.25, 0.5, 1, 2, 3, 4, 6, 8, 12 h), and the plasma concentrations were determined by LC-MS. Points, mean; bars, SEM; n = 6. Pharmacokinetic parameters of **25** (ip) is shown in the right panel.

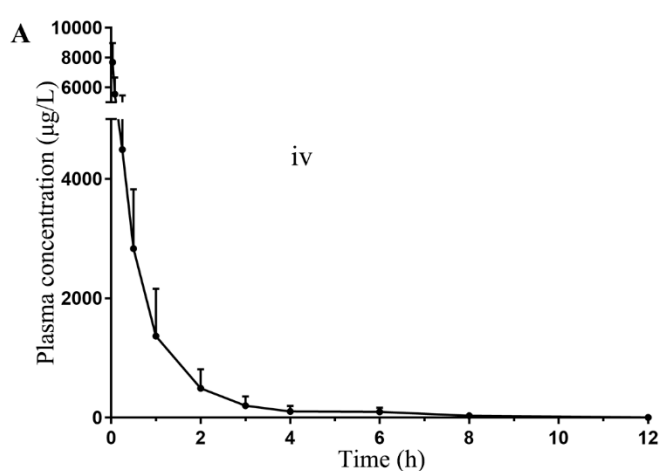

| parameter                 | iv (10 mg/kg) |
|---------------------------|---------------|
| $AUC_{0-\infty}$ (µg·h/L) | 5222.86       |
| $C_{max}$ (µg/L)          | 7698.75       |
| $MRT_{0-\infty}$ (h)      | 1.20          |
| $V_{ss}$ (L/kg)           | 3.59          |
| $CL$ (L/h/kg)             | 1.92          |
| $t_{1/2}$ (h)             | 1.30          |

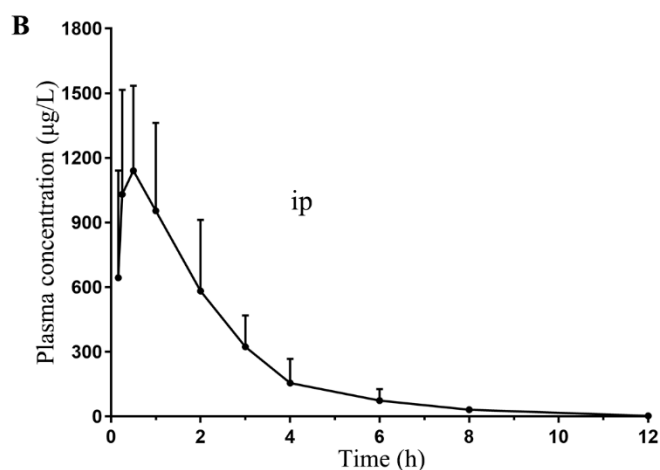

| parameter                 | ip (10 mg/kg) |
|---------------------------|---------------|
| $AUC_{0-\infty}$ (µg·h/L) | 2760.58       |
| $C_{max}$ (µg/L)          | 1140.37       |
| $T_{max}$ (h)             | 0.5           |
| $F$ (%)                   | 52.86         |
| $MRT_{0-\infty}$ (h)      | 2.12          |
| $V_{ss}$ (L/kg)           | 13.13         |
| $CL$ (L/h/kg)             | 6.85          |
| $t_{1/2}$ (h)             | 1.33          |



**Figure S8.** IC<sub>50</sub> curves of compounds **1**, **9e**, **25**, and **25R<sup>a</sup>** on CLK1 and DYRK1A. The values were determined using the KinaseProfiler of Eurofins, in duplicates at 10 different concentrations with an ATP concentration of 10 μM. For detailed protocols, see <http://www.eurofins.com/pharmadiscovery>.

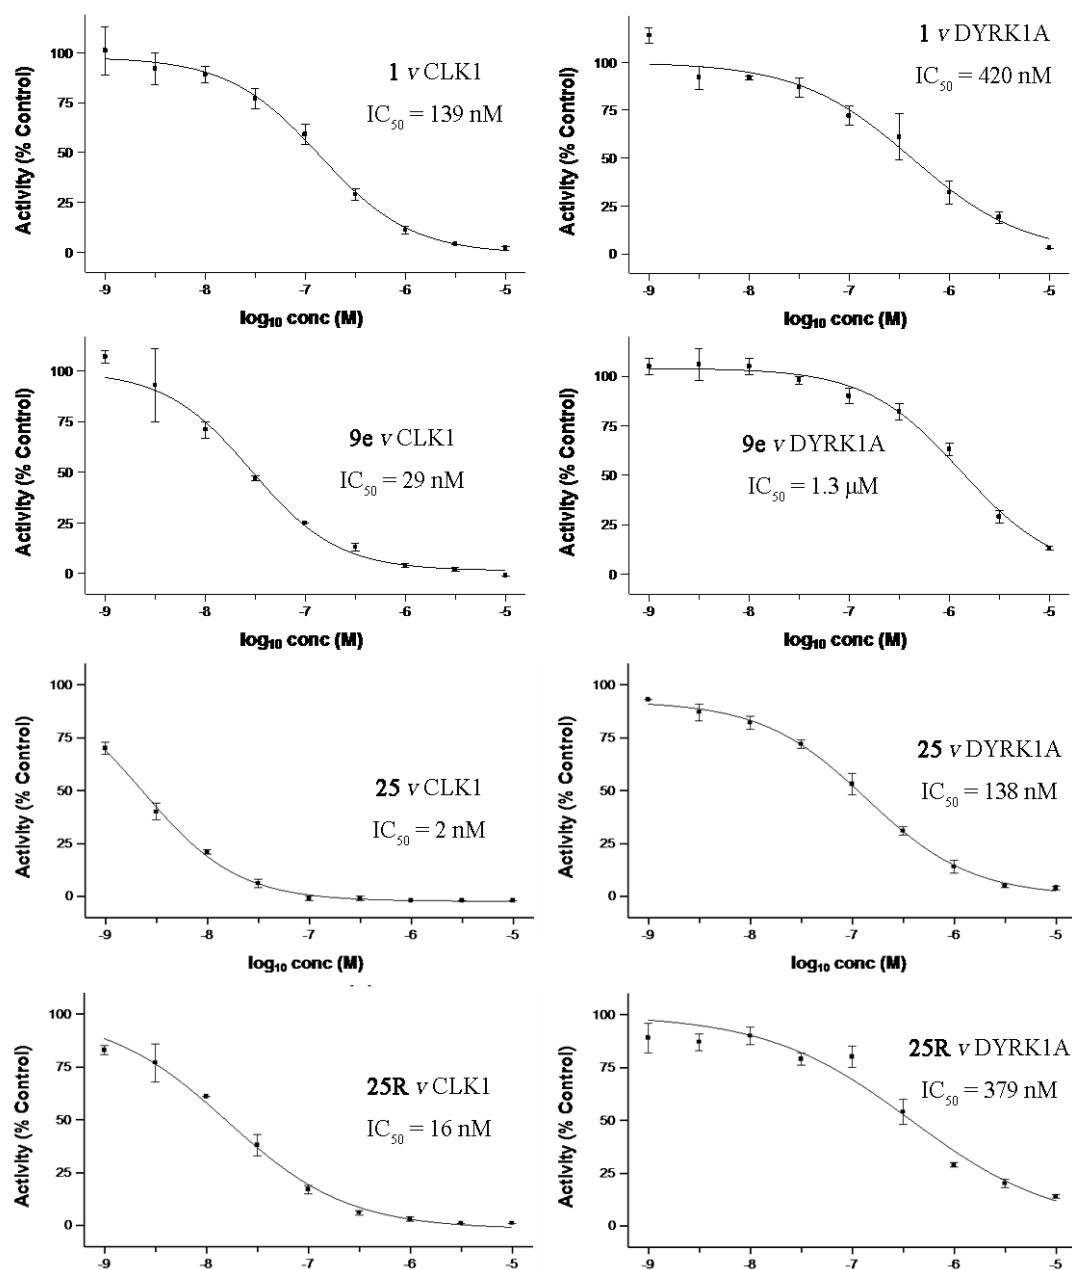

<sup>a</sup>**25R** is the enantiomer of **25**.



**Figure S9.** IC<sub>50</sub> curves of compound **25** on remaining kinases whose activity% @ 10  $\mu$ M is lower than 50%. In cases of CLKs and DYRKs, IC<sub>50</sub> values were determined in duplicates at 10 different concentrations. In other cases, IC<sub>50</sub> values were determined in singlicate at 10 different concentrations. [ATP] = 10  $\mu$ M. For detailed protocols, see <http://www.eurofins.com/pharmadiscovery>.

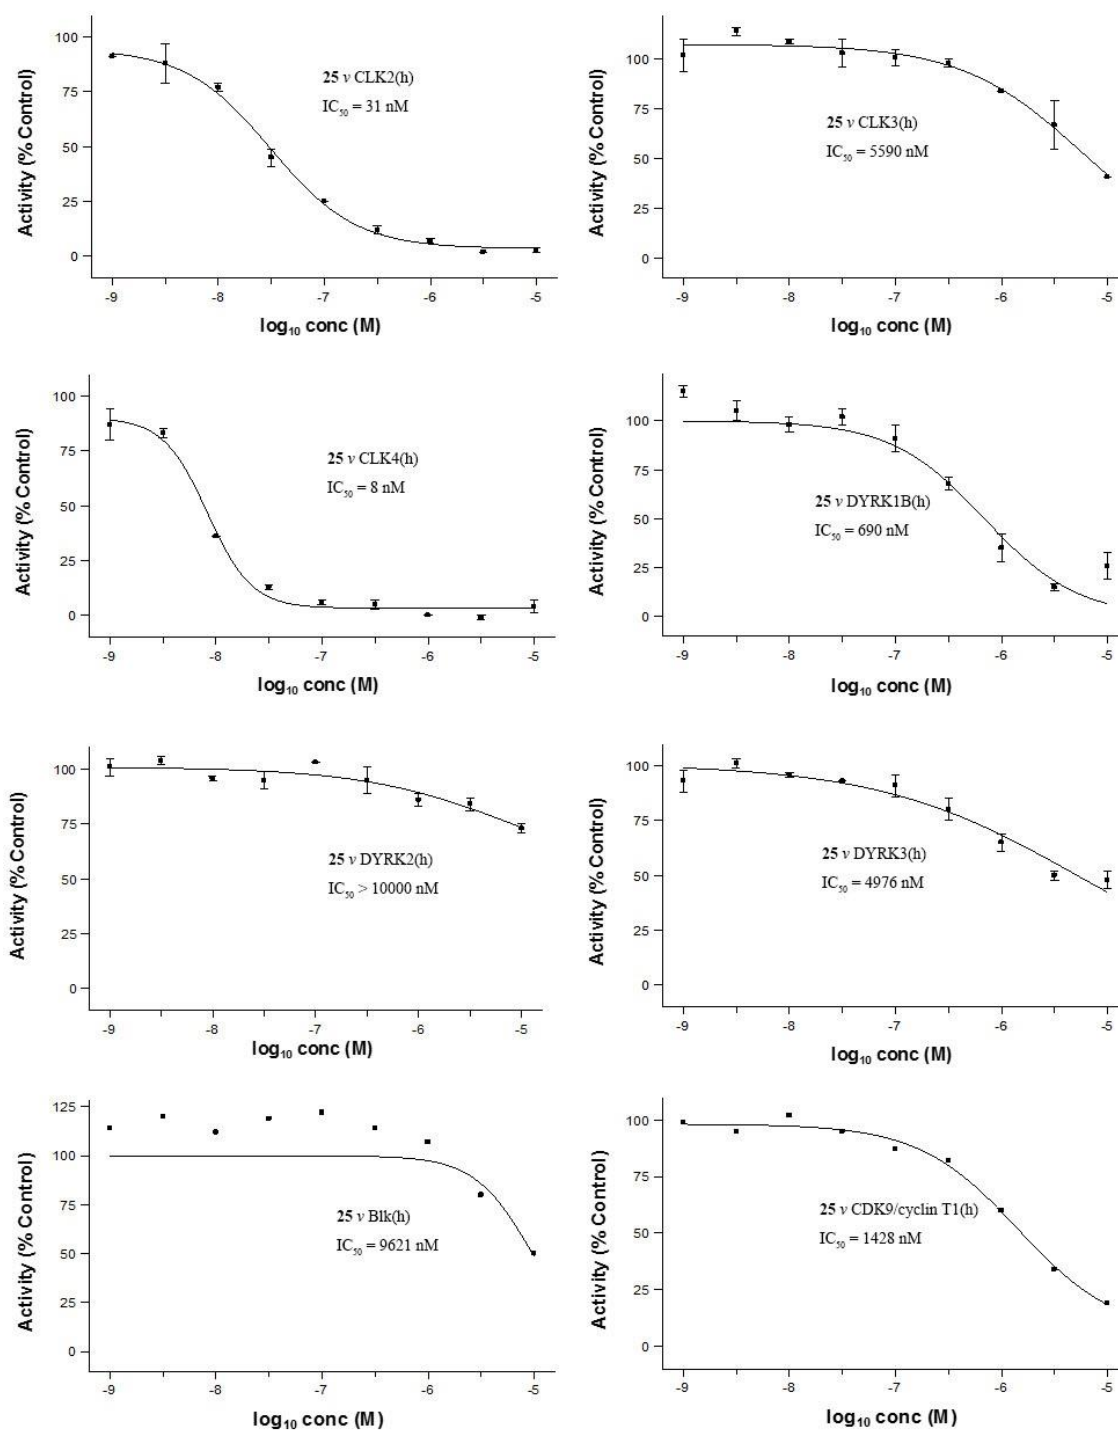

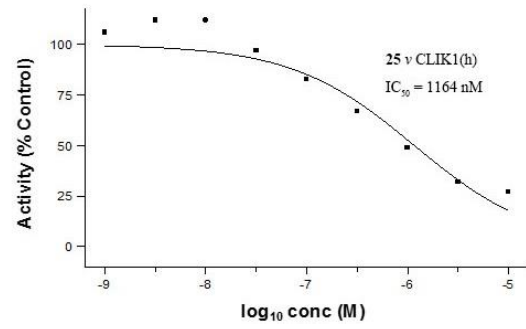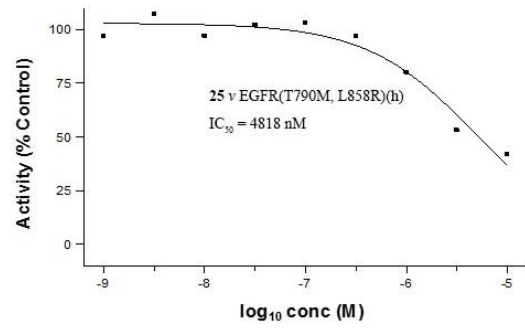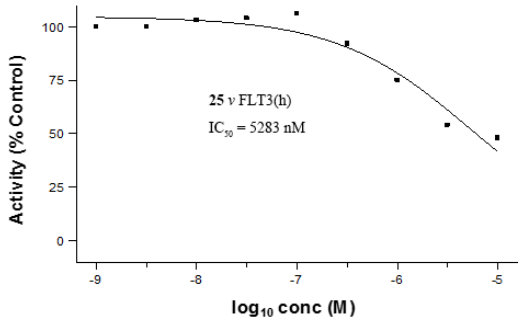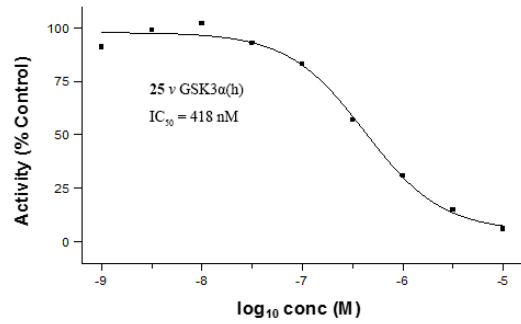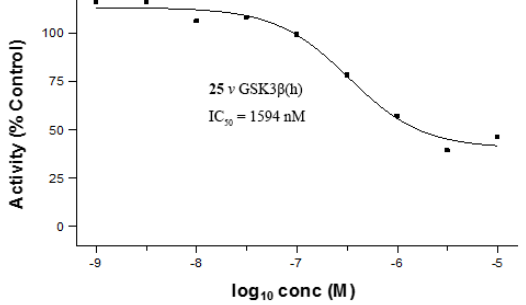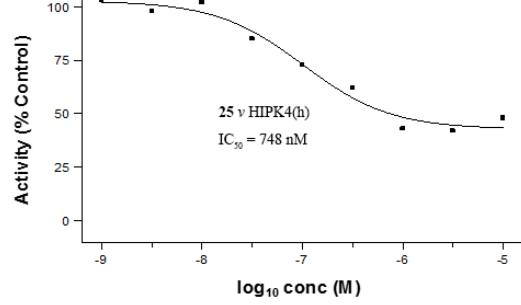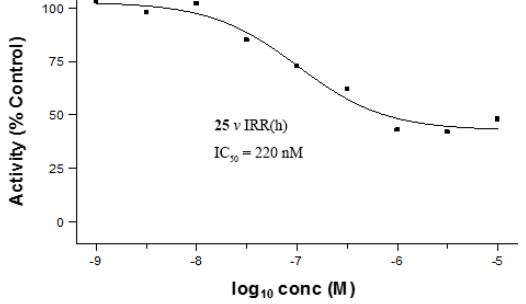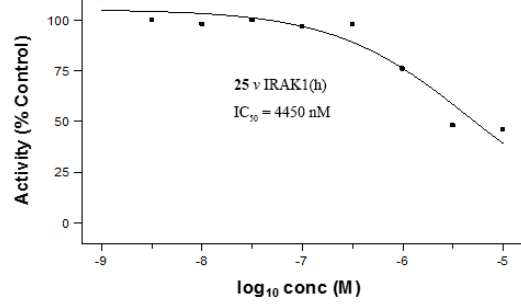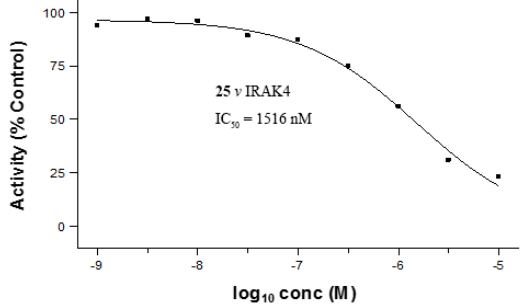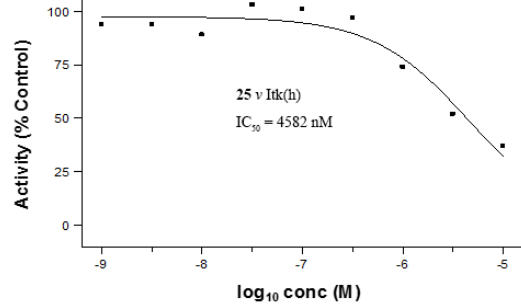

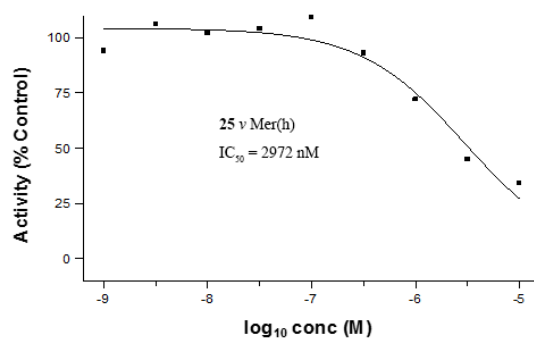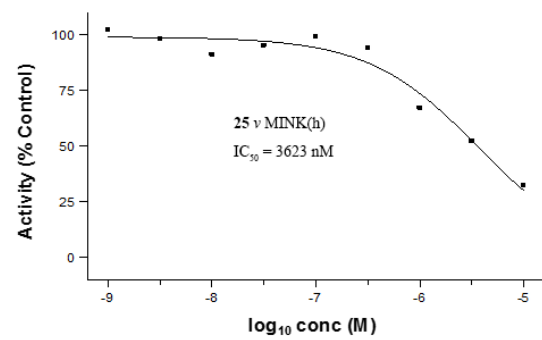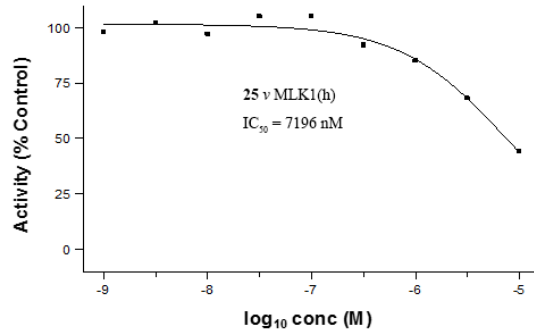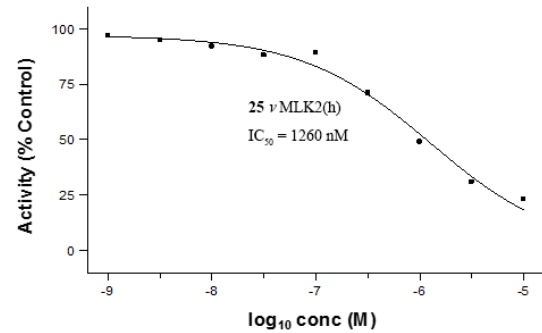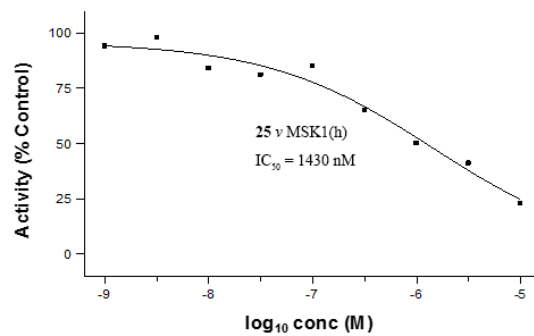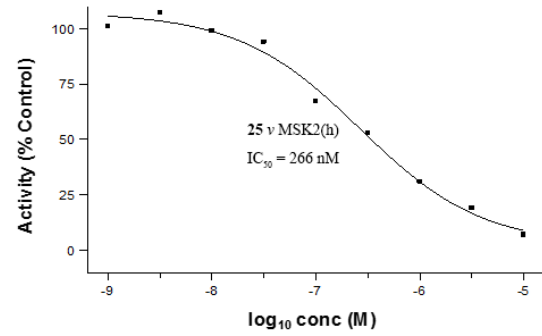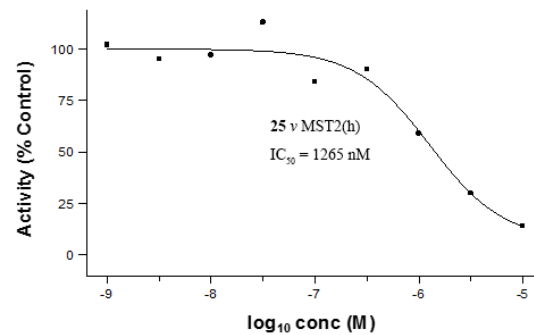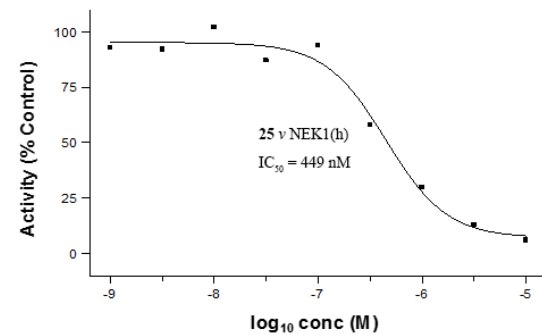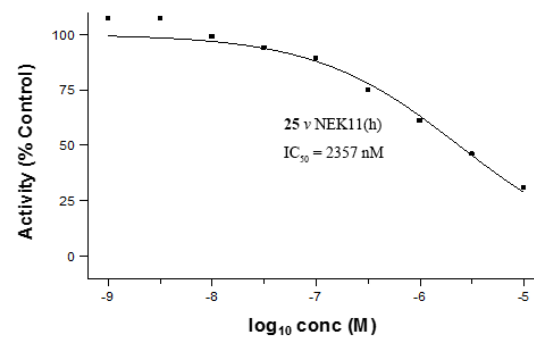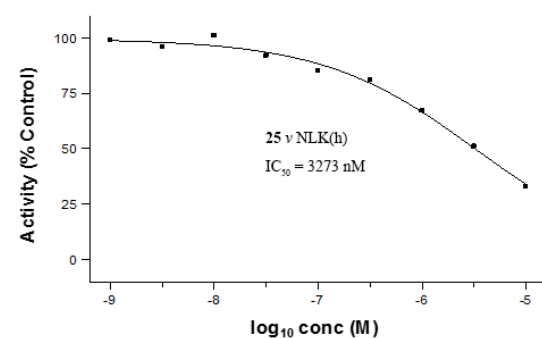

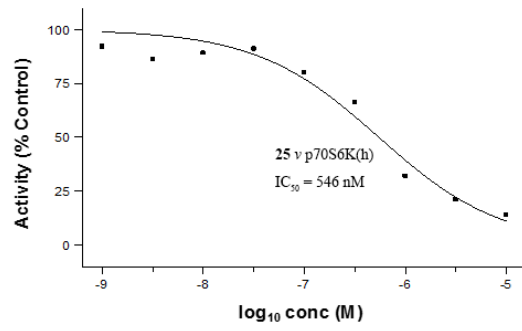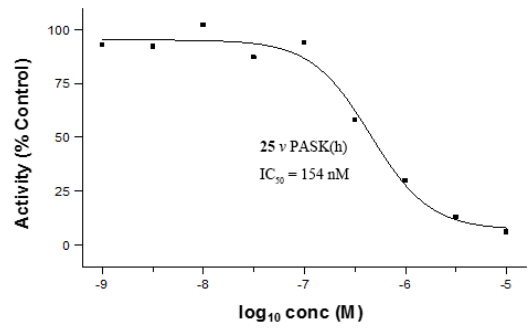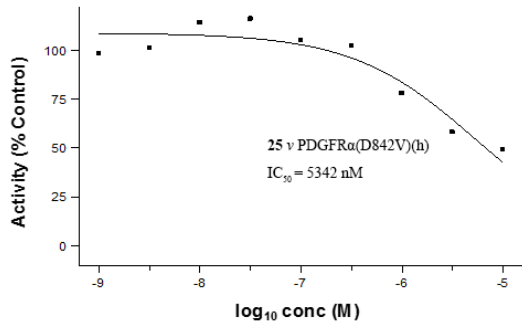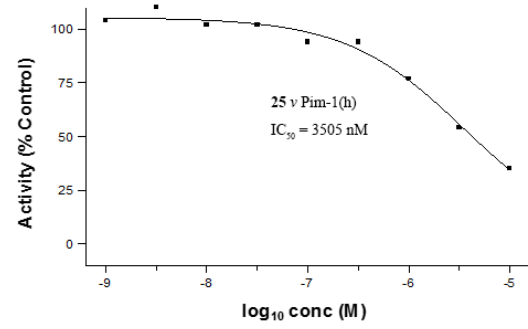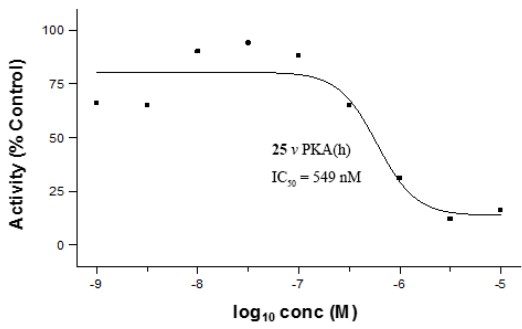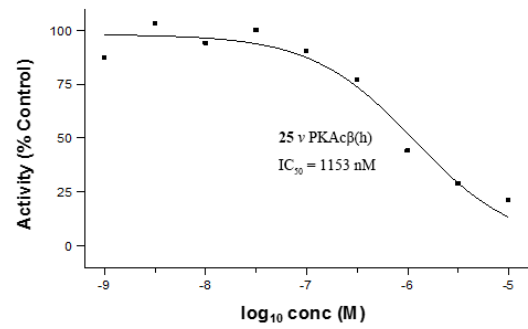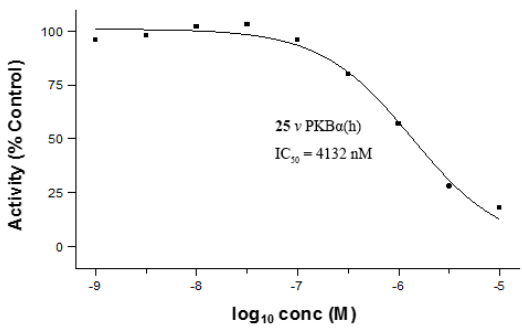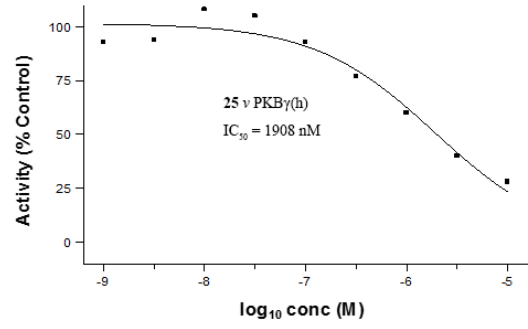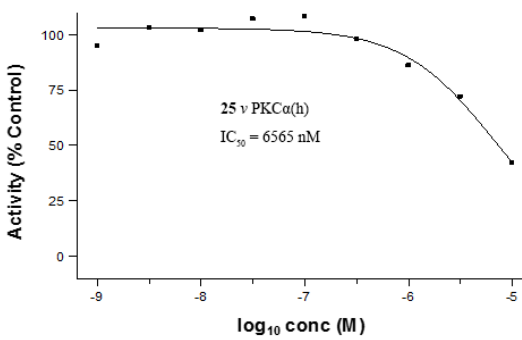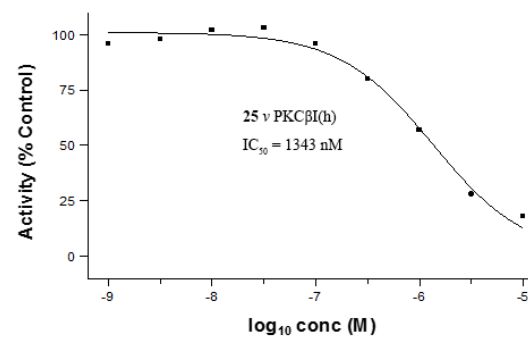

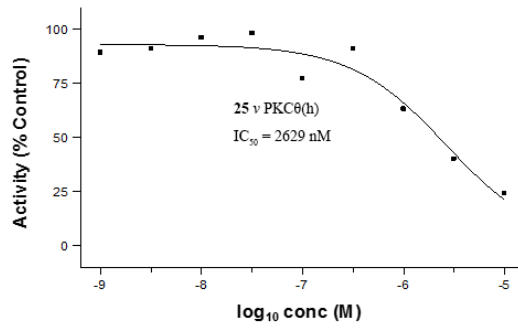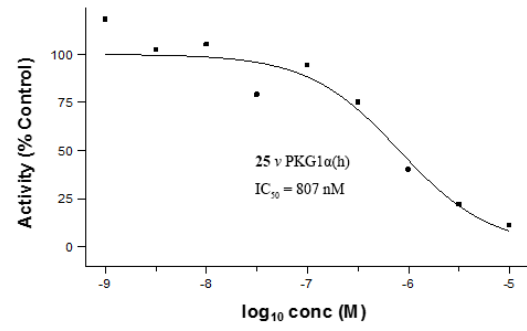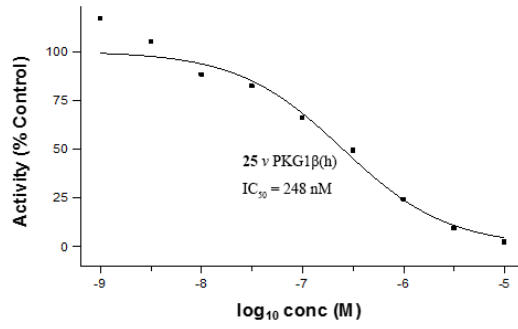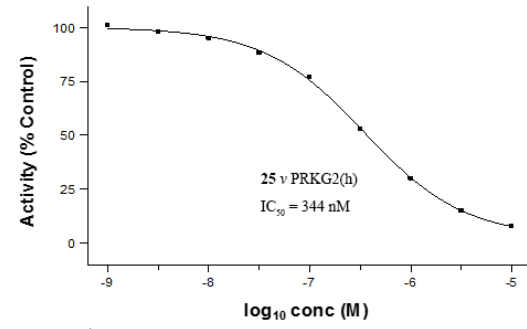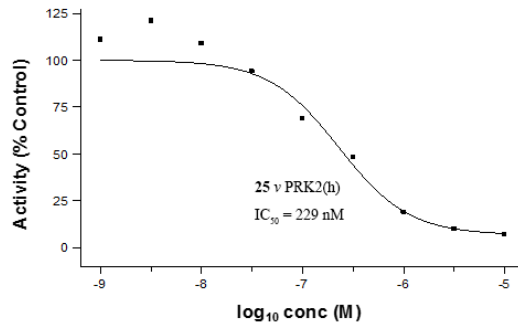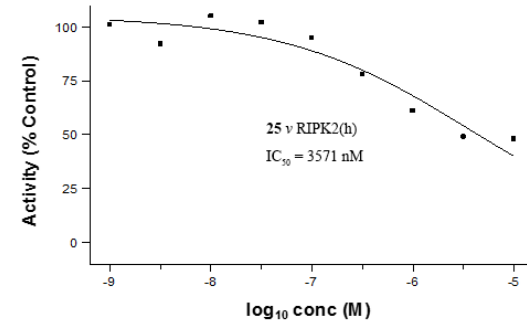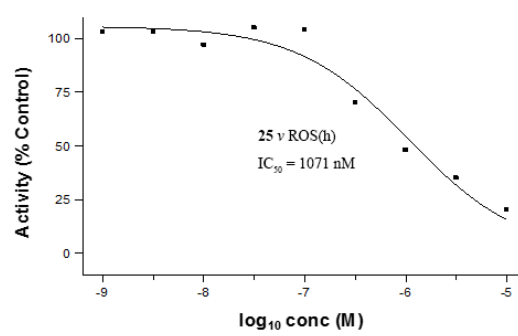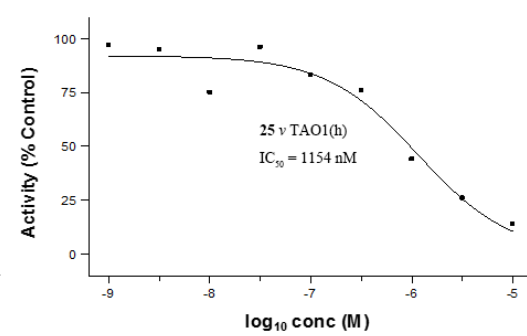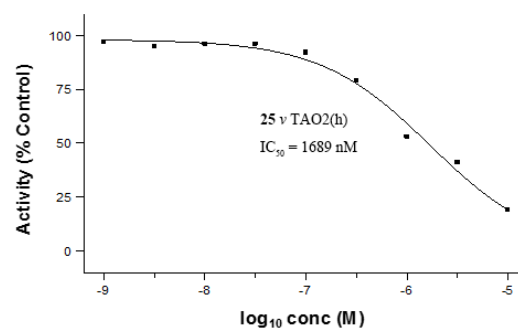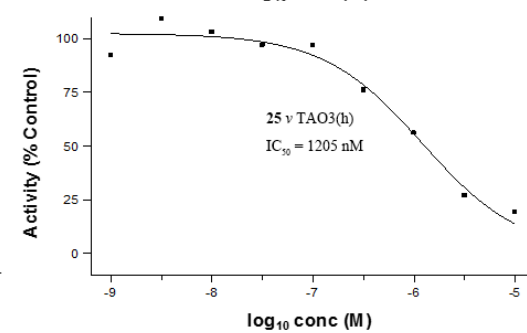

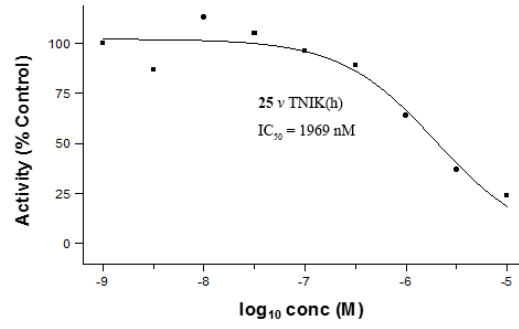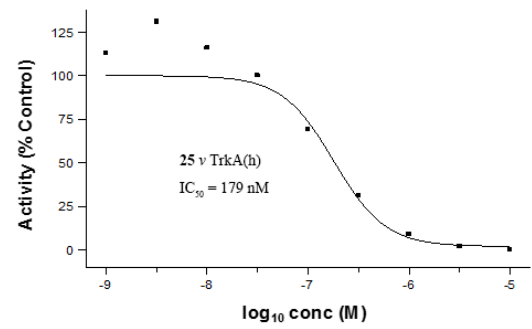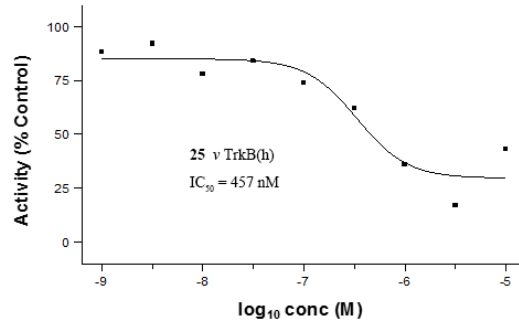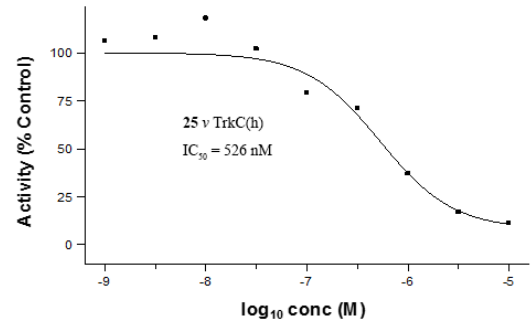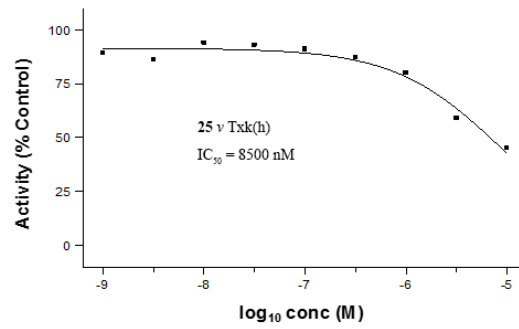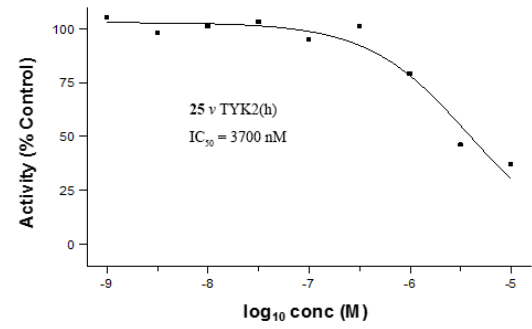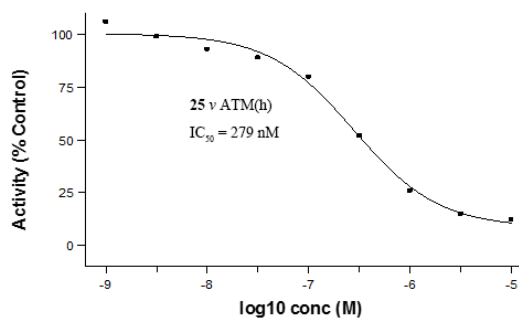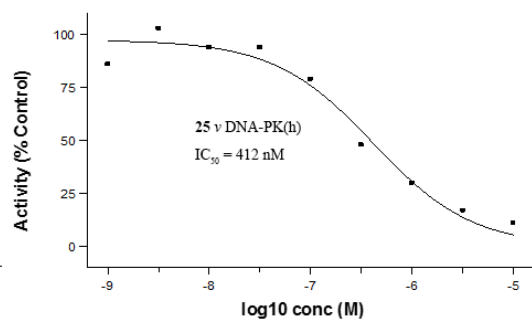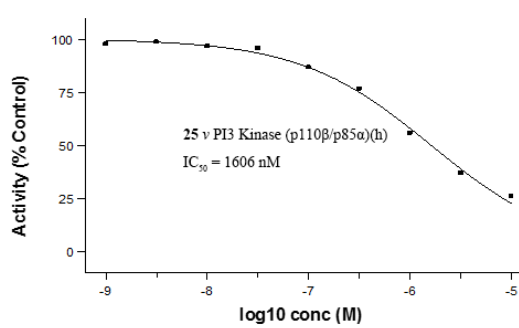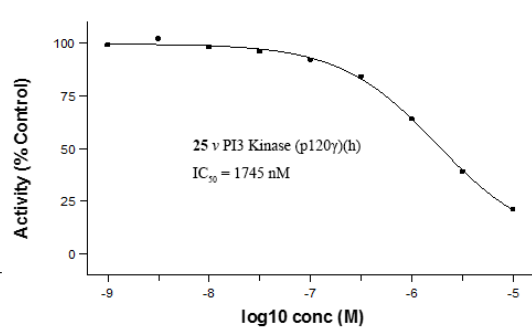

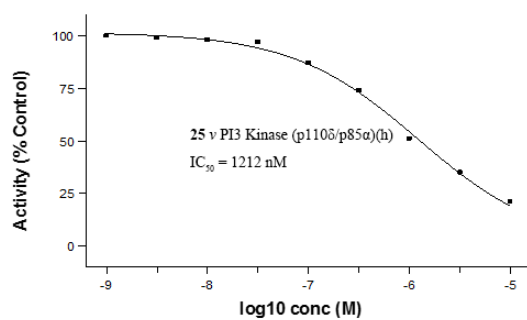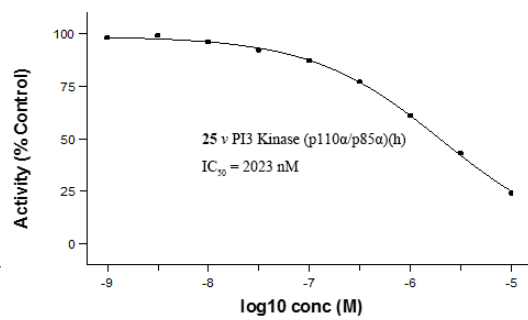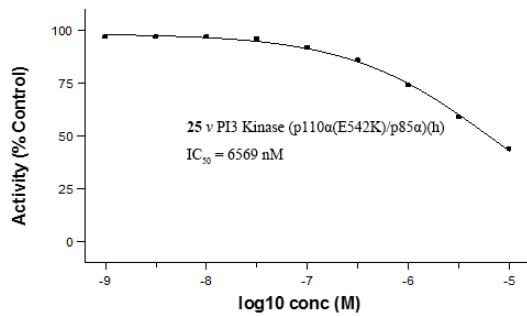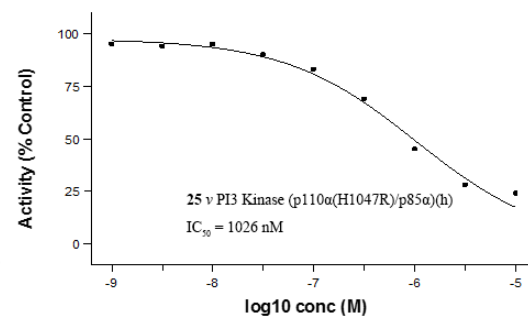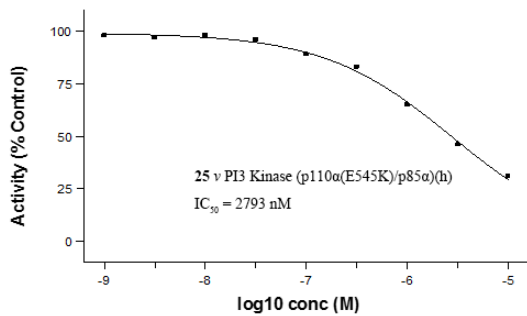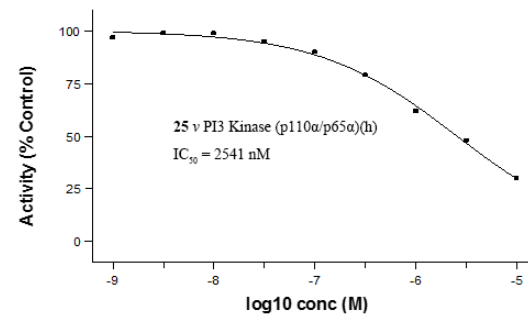

**Synthesis and Structure Confirmation of Compound 25R (the Enantiomer of Compound 25)**

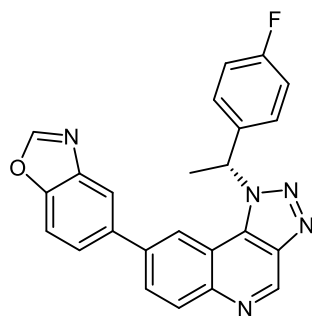

**25R**

**(*R*)-(+)-5-(1-(1-(4-Fluorophenyl)ethyl)-1*H*-[1,2,3]triazolo[4,5-*c*]quinolin-8-yl)benzo[*d*]oxazole (25R).** The title compound was prepared from **8f** (50 mg, 135  $\mu$ mol) and self-prepared **28** (33 mg, 135  $\mu$ mol) using the procedure described for compound **1** in 84.3% yield as a white powder.  $[\alpha]_{\text{D}}^{25} = +238.74$  ( $c = 0.191$ ,  $\text{CH}_3\text{Cl}$ , ee 100%).  $^1\text{H}$  NMR (400 MHz, DMSO)  $\delta$  9.63 (s, 1H), 8.87 (s, 1H), 8.52 (d,  $J = 1.6$  Hz, 1H), 8.32 (d,  $J = 8.7$  Hz, 1H), 8.24 (dd,  $J = 8.7, 1.9$  Hz, 1H), 8.18 (d,  $J = 1.2$  Hz, 1H), 8.00 (d,  $J = 8.3$  Hz, 1H), 7.77 (dd,  $J = 8.3, 1.6$  Hz, 1H), 7.32 (dd,  $J = 8.7, 5.4$  Hz, 2H), 7.19 (t,  $J = 8.8$  Hz, 2H), 7.06 (q,  $J = 6.7$  Hz, 1H), 2.22 (d,  $J = 6.7$  Hz, 3H).  $^{13}\text{C}$  NMR (101 MHz, DMSO)  $\delta$  163.26, 160.83, 155.64, 150.71, 145.43, 144.87, 141.37, 140.21, 139.22, 138.00, 137.97, 137.35, 133.14, 131.26, 129.35, 128.48, 128.39, 124.82, 121.53, 120.99, 116.59, 116.38, 115.70, 110.48, 60.08, 23.55. ESI-MS  $m/z$  410.1  $[\text{M} + \text{H}]^+$ . HRMS  $m/z$  (ESI) calcd for  $\text{C}_{24}\text{H}_{17}\text{FN}_5\text{O}$   $[\text{M} + \text{H}]^+$  410.1412; found, 410.1406. Chiral HPLC analysis (mobile phase: 2-propanol/*n*-hexane = 30/70, flow rate = 1.0 mL/min,  $\lambda = 255.9$  nm,  $t_{\text{R}} = 45.89$  min).



### **Pharmacokinetic Assessments of Compound 25.**

Catheters were surgically placed into the jugular veins of male Sprague–Dawley rats (Chinese Academy of Medical Science, Beijing, China) to collect serial blood samples. The animals were fasted overnight prior to dosing, and food was withheld until 4 h after dosing. Compound **25** was dissolved in 2.5% ethanol, 2.5% castor oil, and 95% saline for a concentration of 1 mg/mL. The rats ( $200 \pm 10$  g) were administered with a single dose of compound **25** (10 mg/kg) by intraperitoneal injection ( $n = 6$ ) or intravenous injection ( $n = 6$ ). Blood was collected in heparin-containing tubes at indicated time points and centrifuged at 4 °C immediately to obtain plasma. The plasma concentrations of **25** were measured by high performance liquid chromatography (HPLC) with tandem mass spectrometric detection (3200 QTRAP system, Applied Biosystems). Non-compartmental pharmacokinetic parameters were obtained from the plasma concentration–time profiles using DAS software (Enterprise, version 2.0, Mathematical Pharmacology Professional Committee of China). At last, all surviving animals were transferred to the repository or euthanized after completing the test.

# Copies of $^1\text{H}$ - and $^{13}\text{C}$ -NMR Spectra

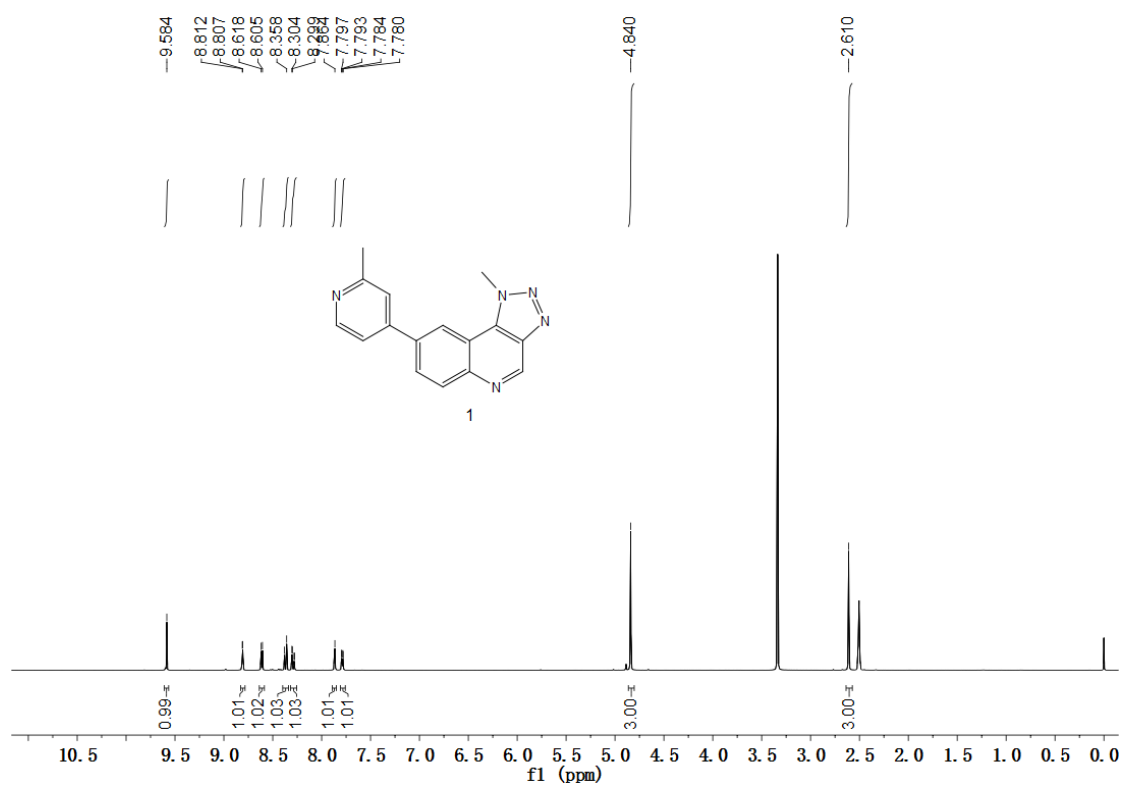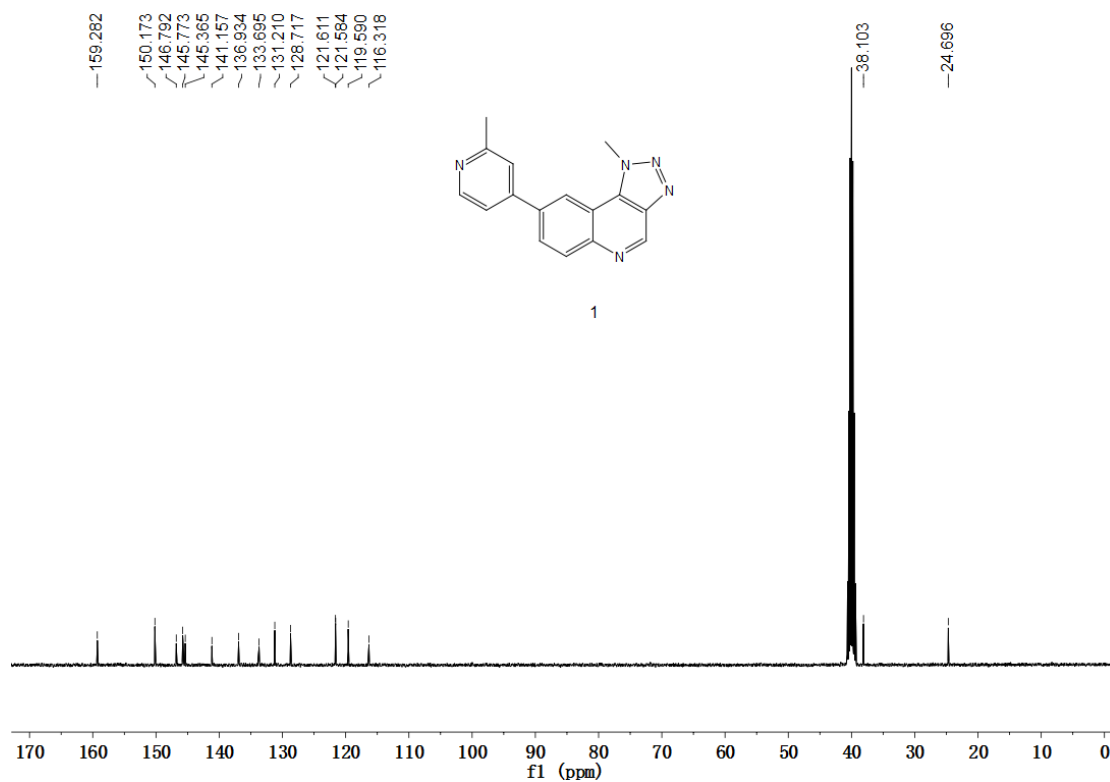

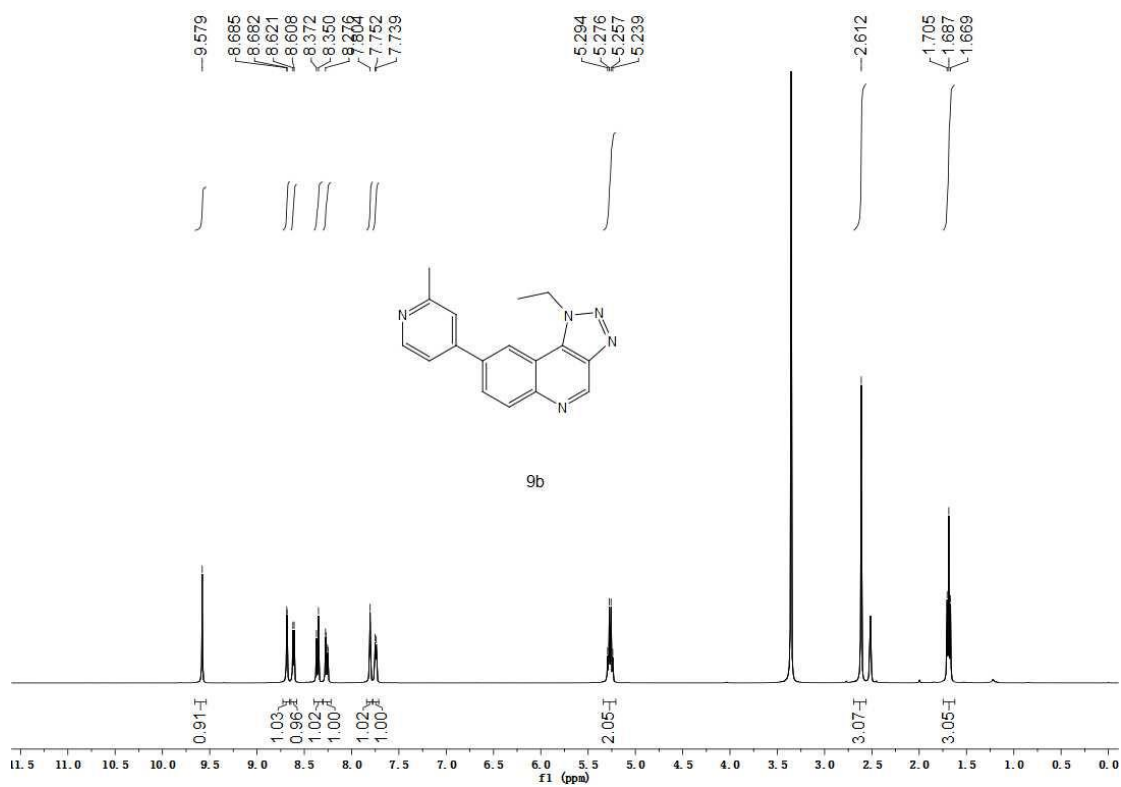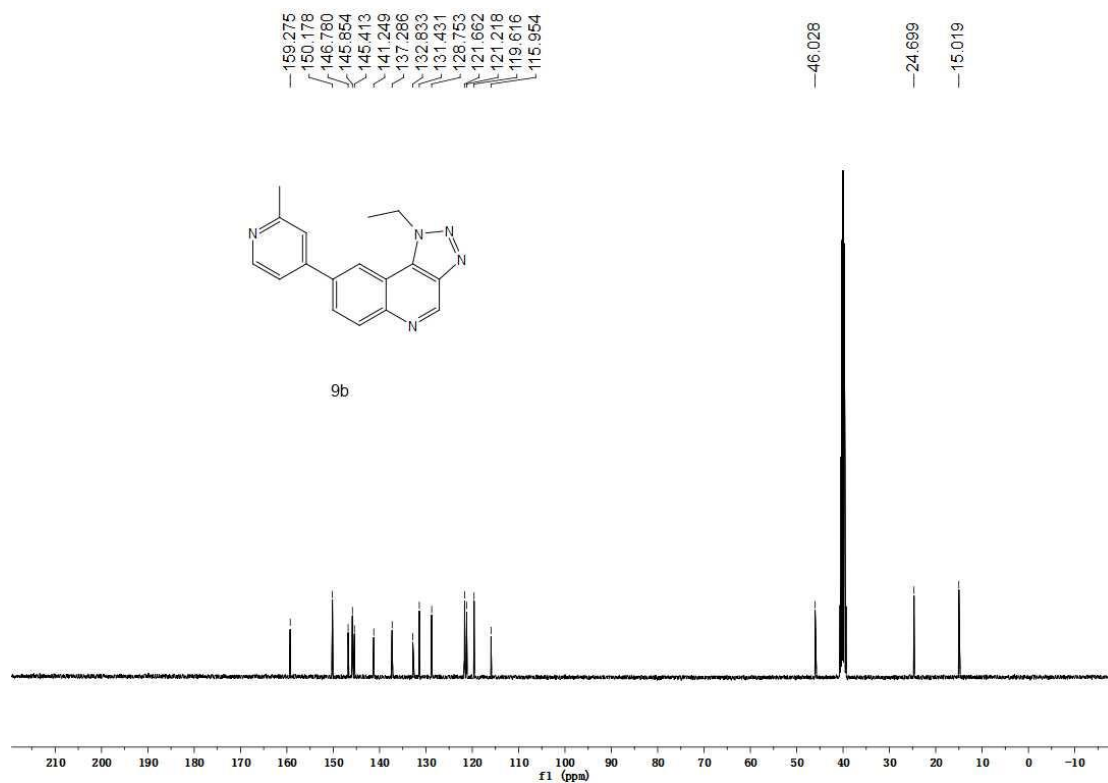

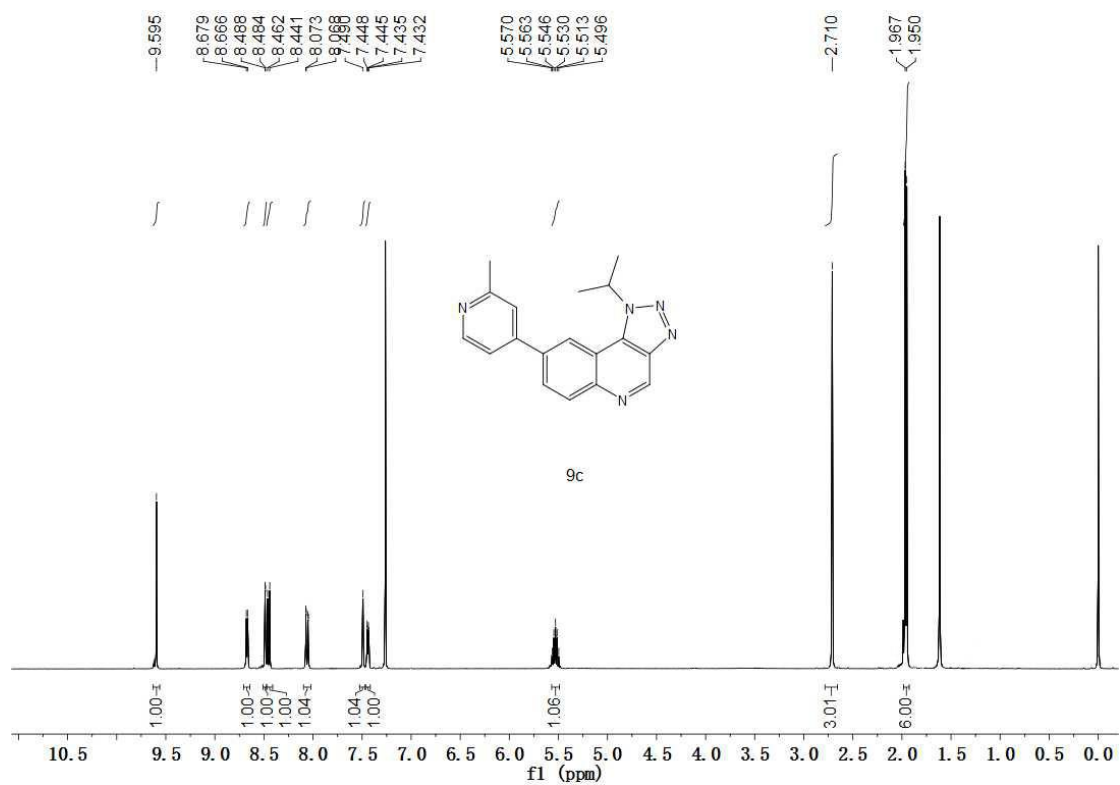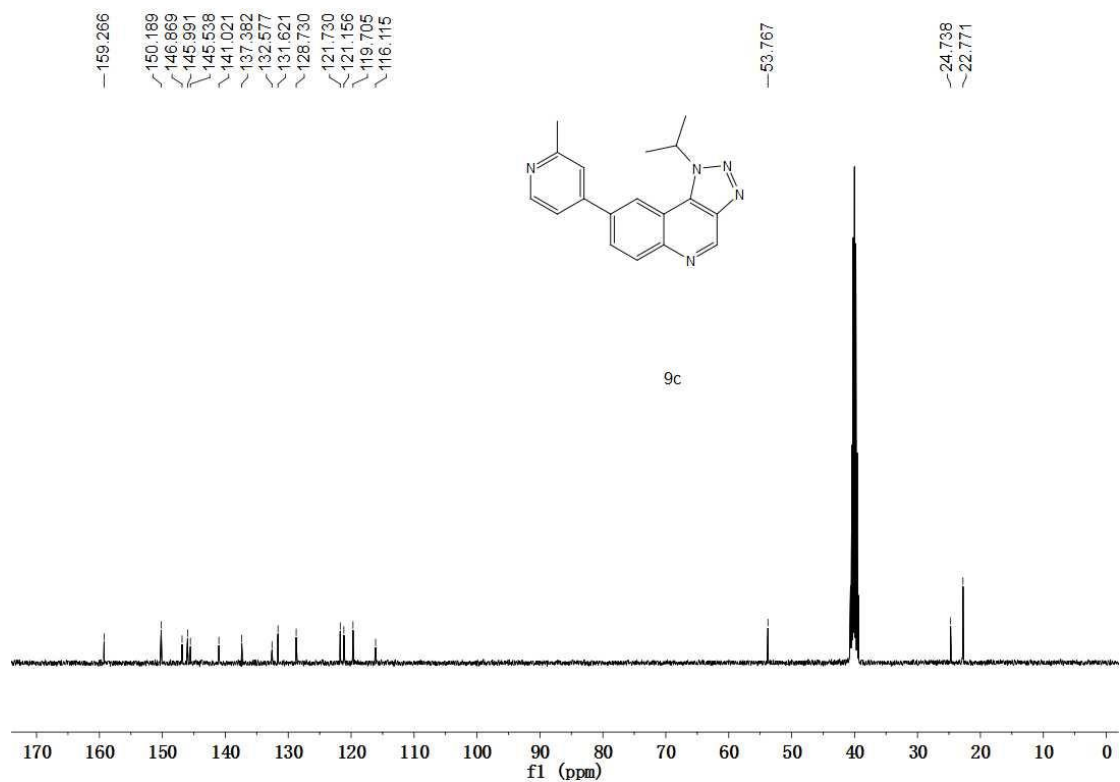

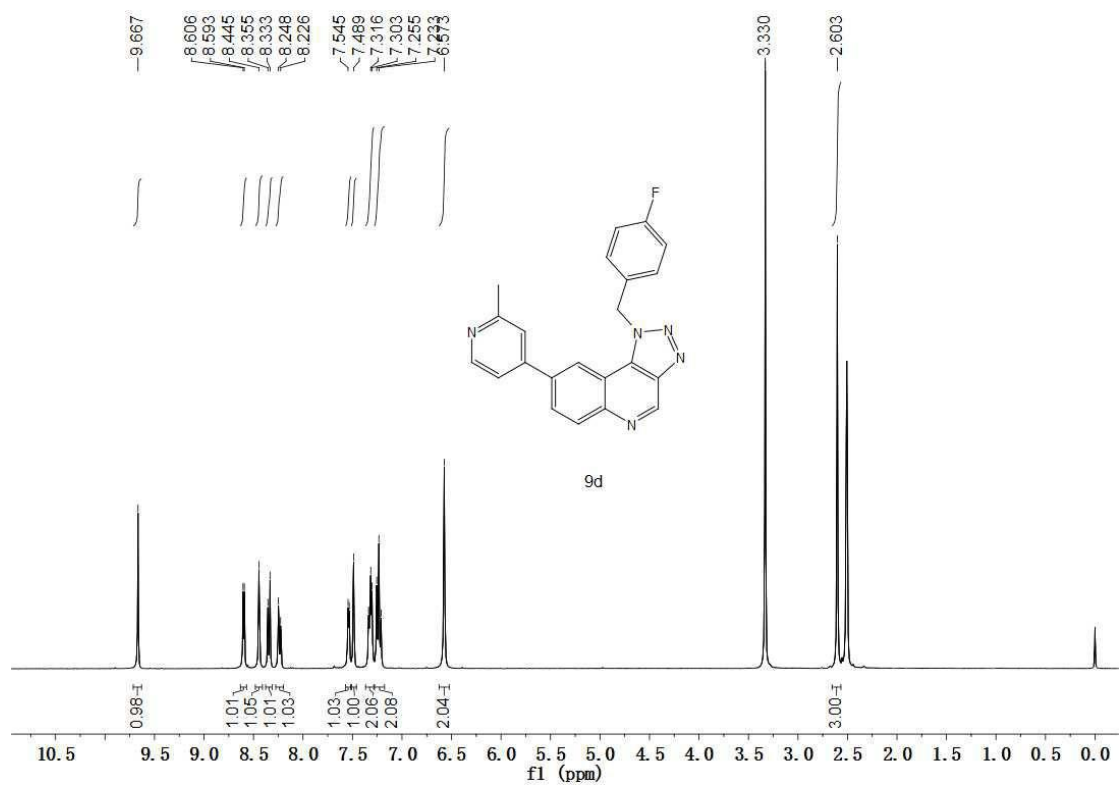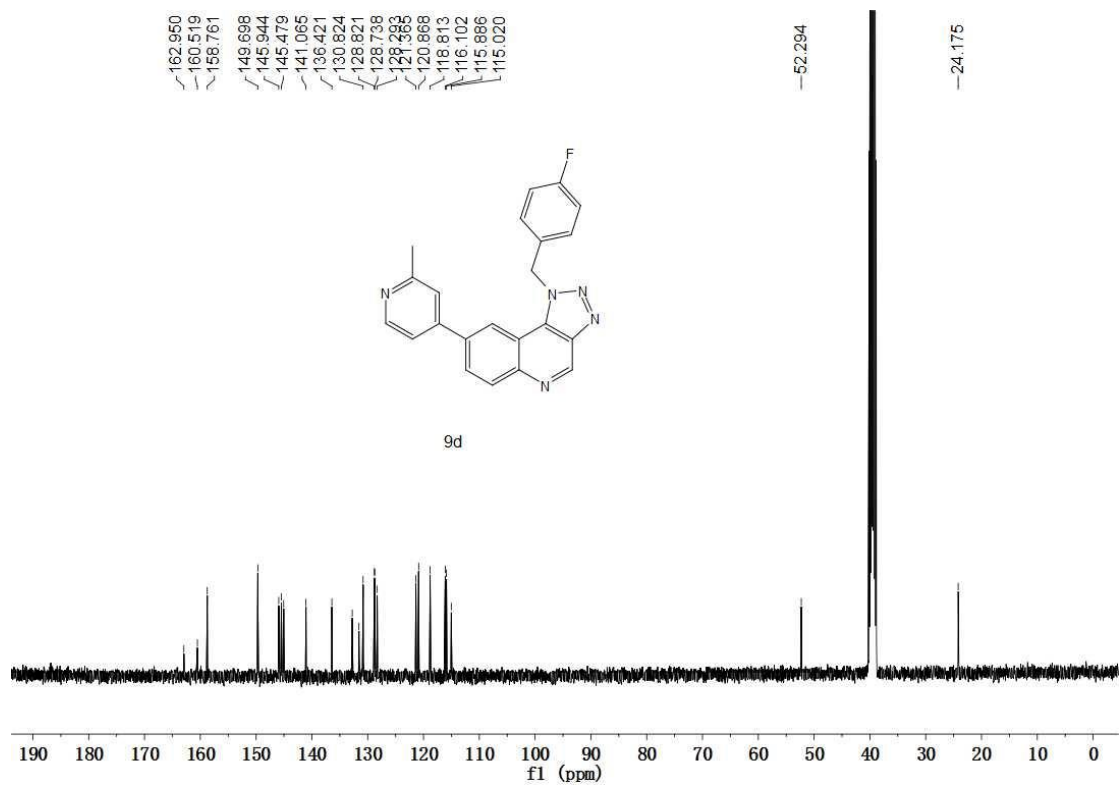

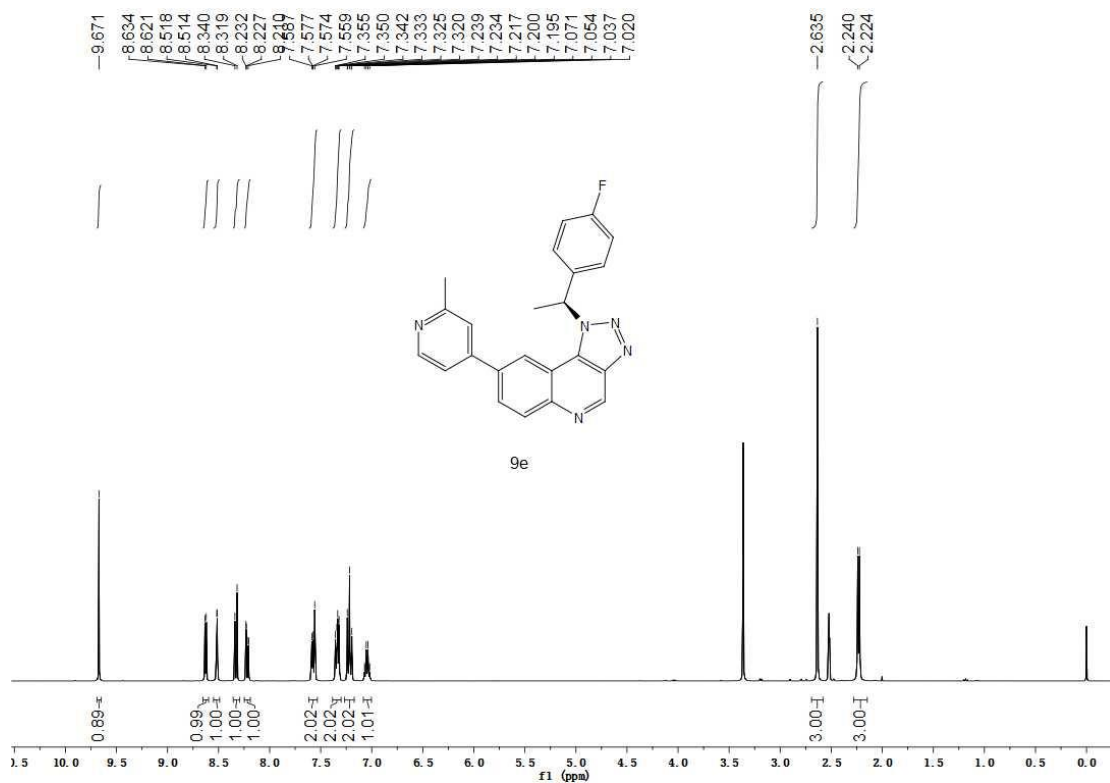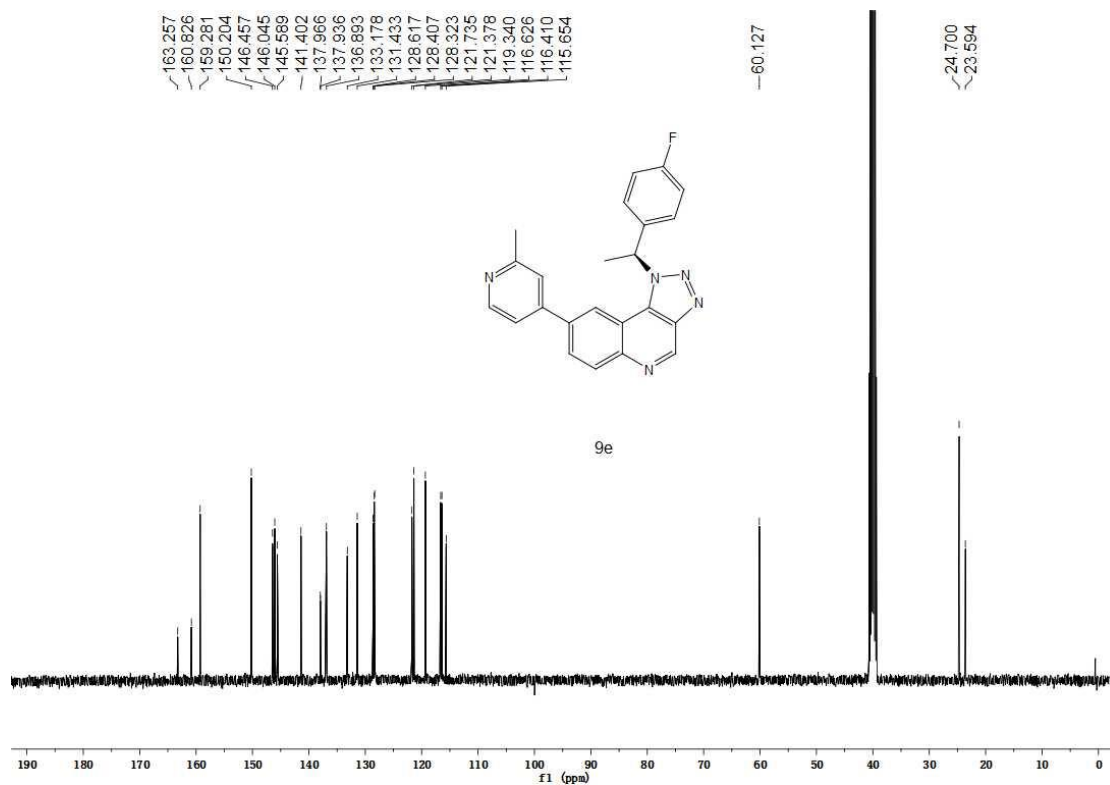

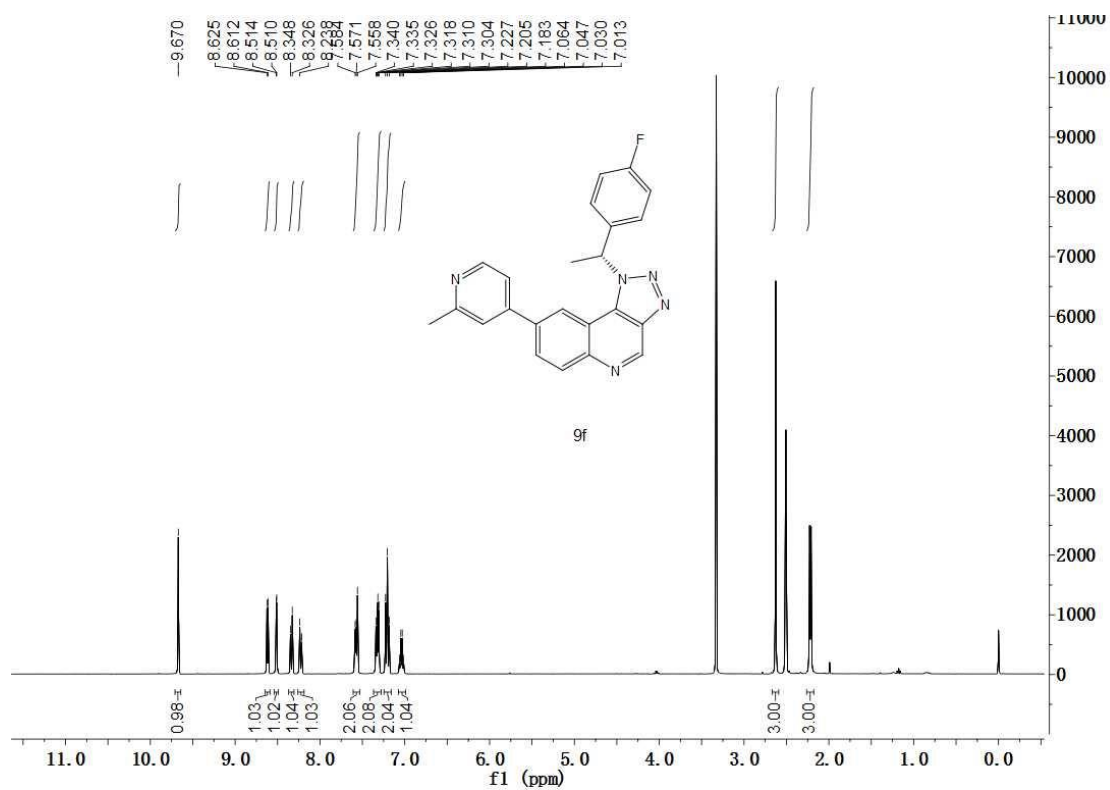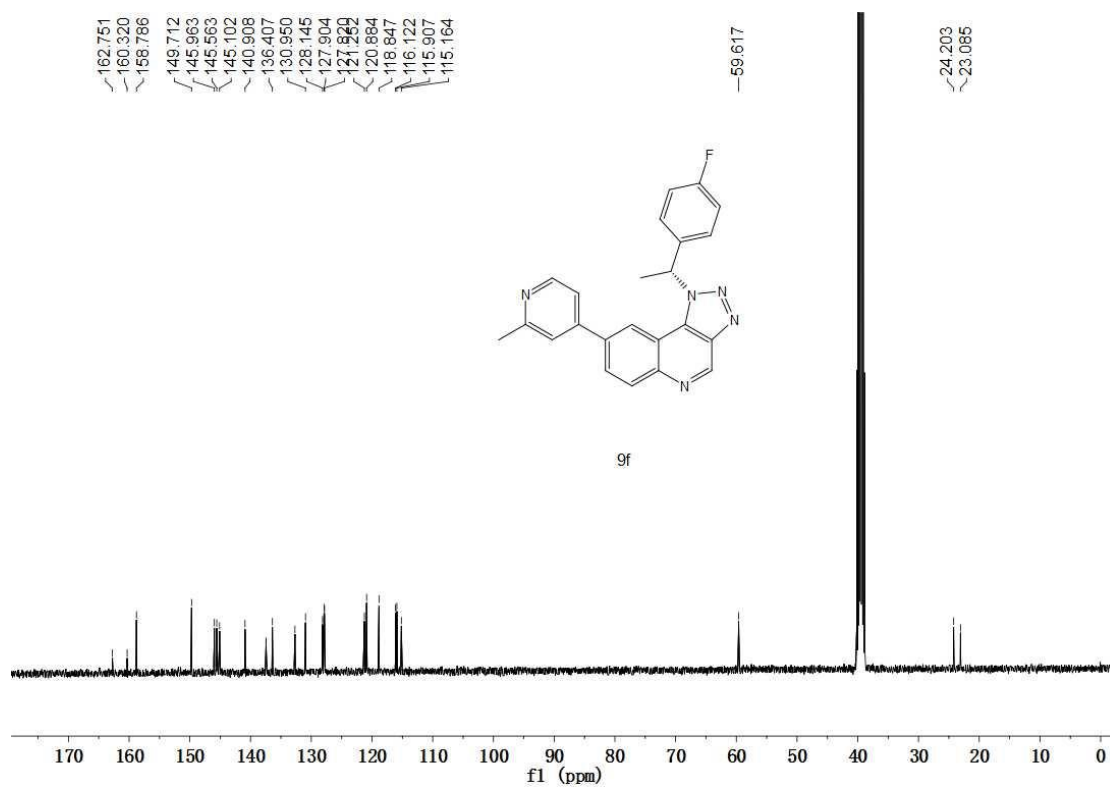

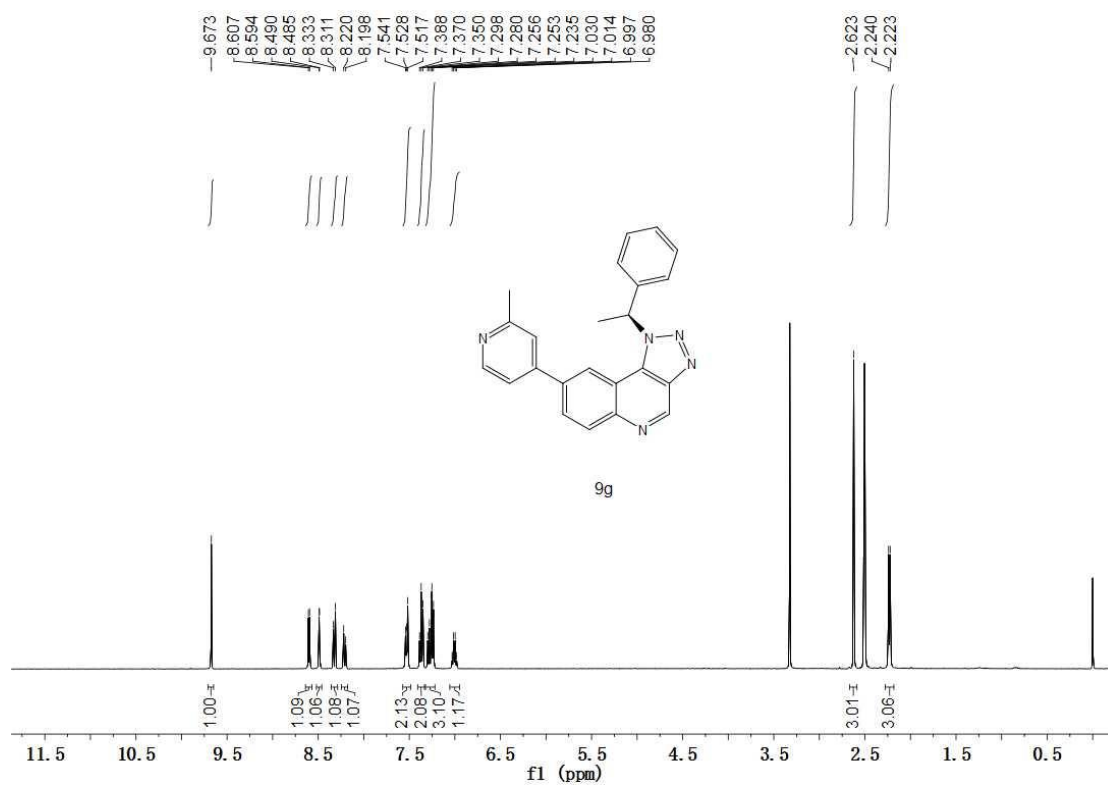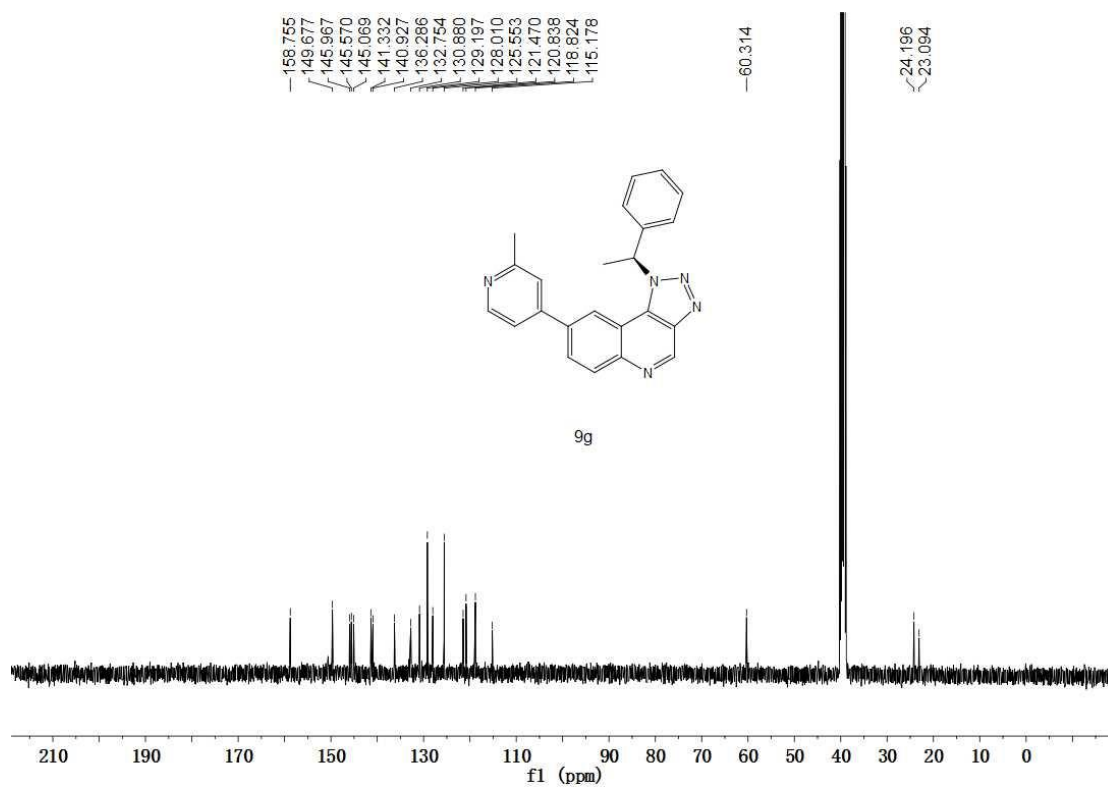



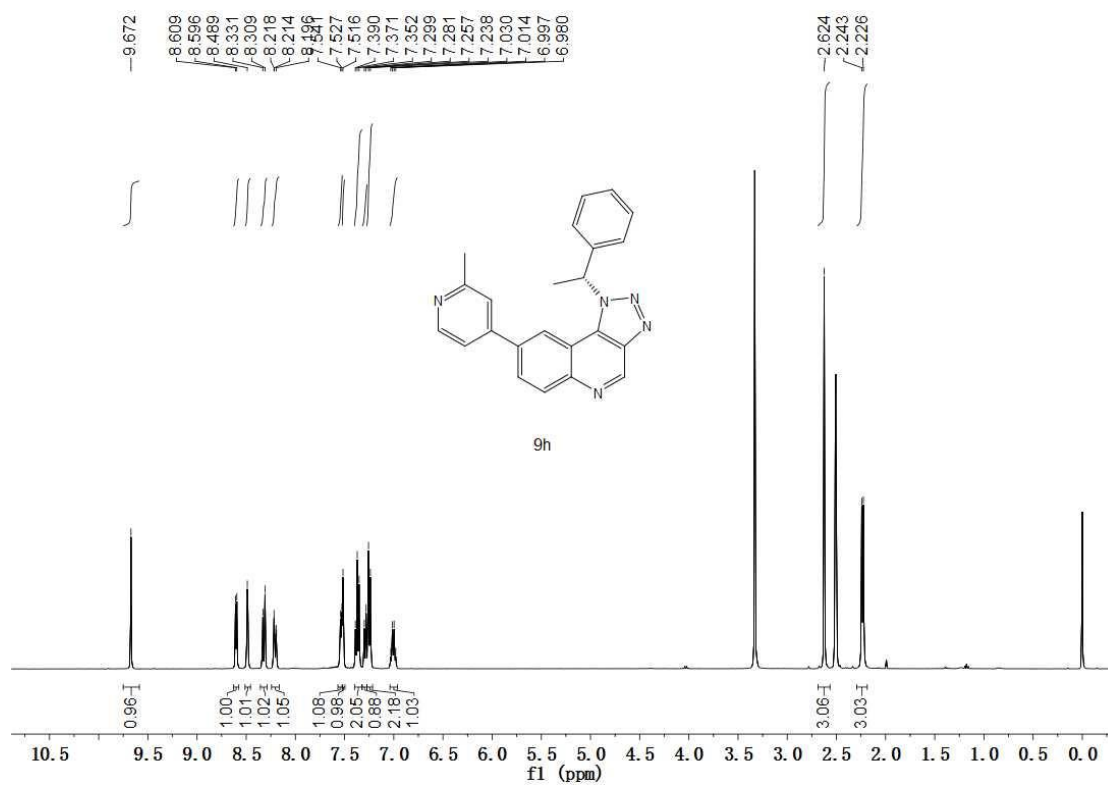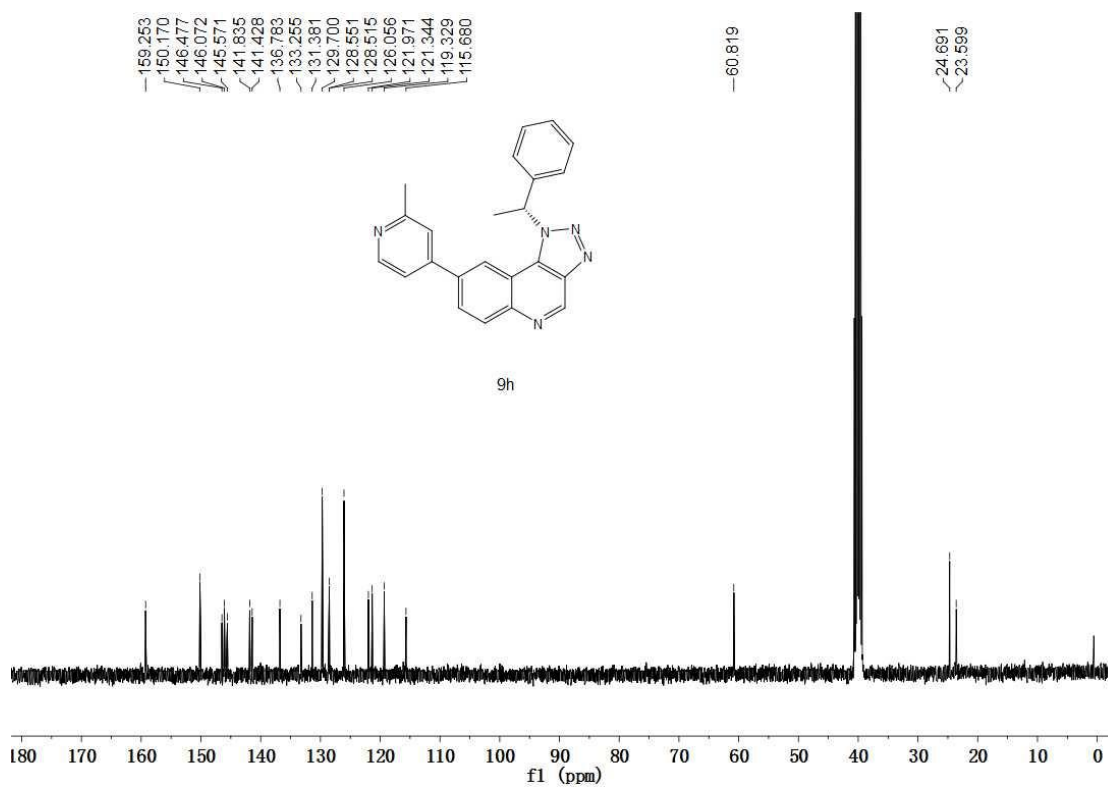

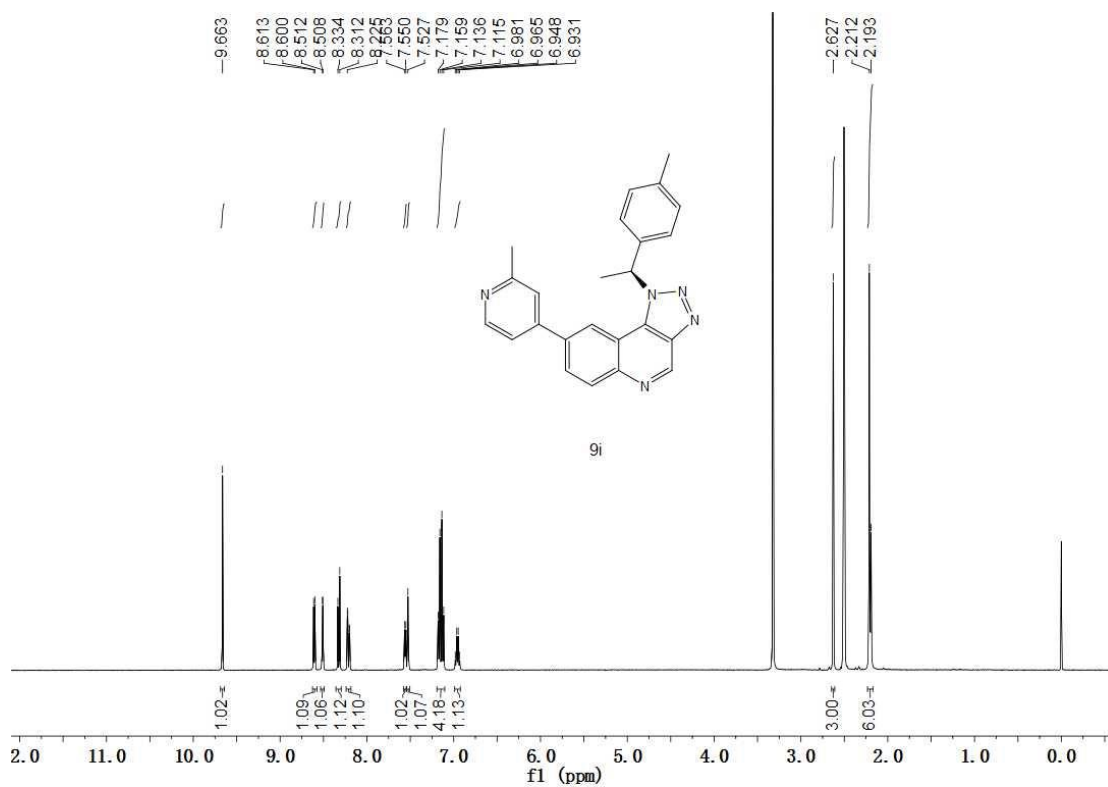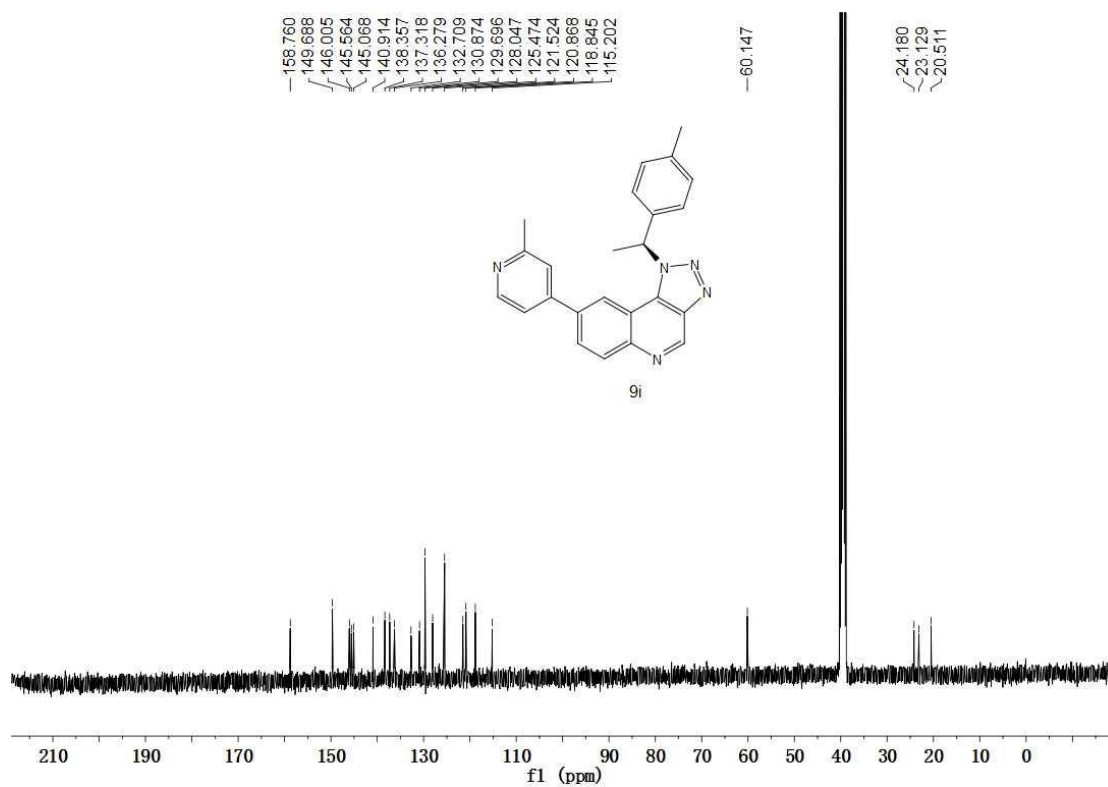

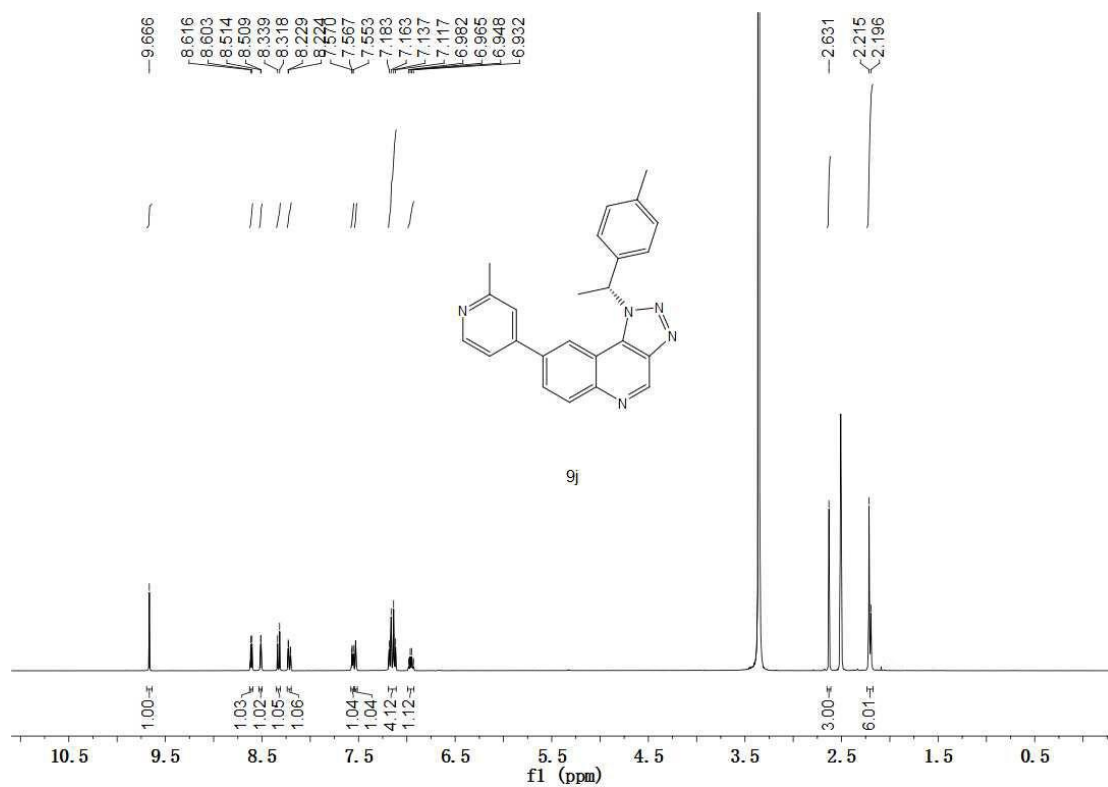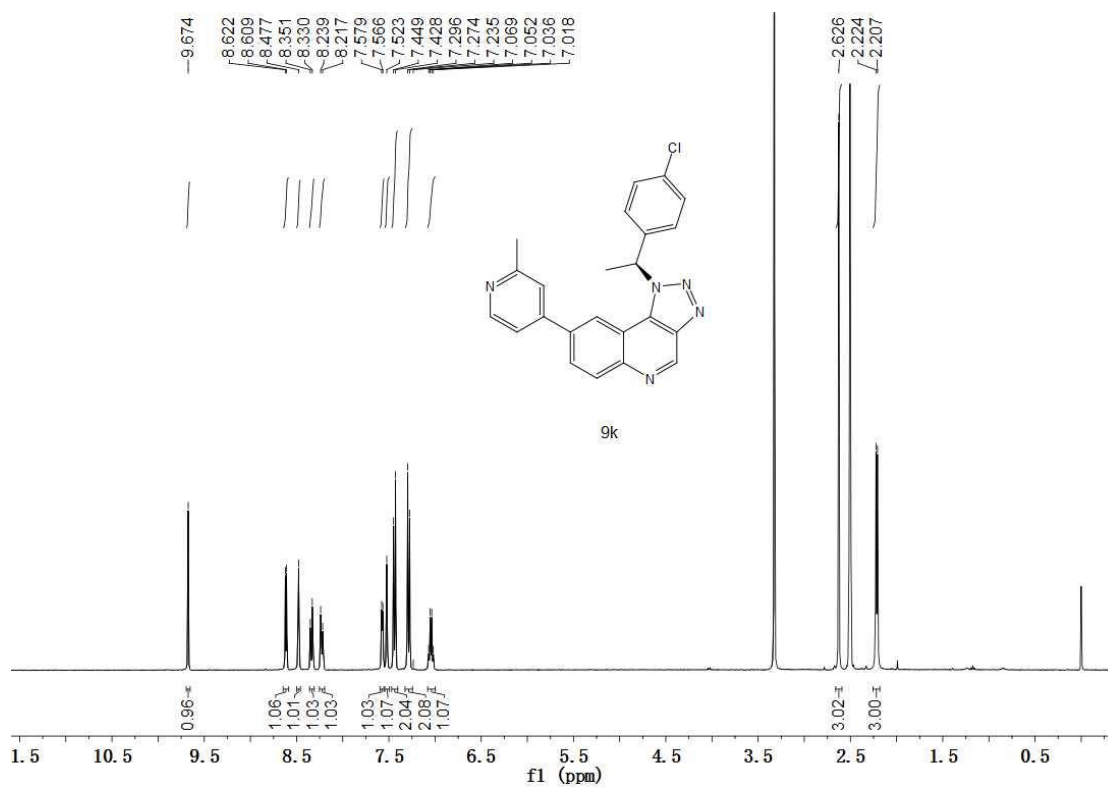

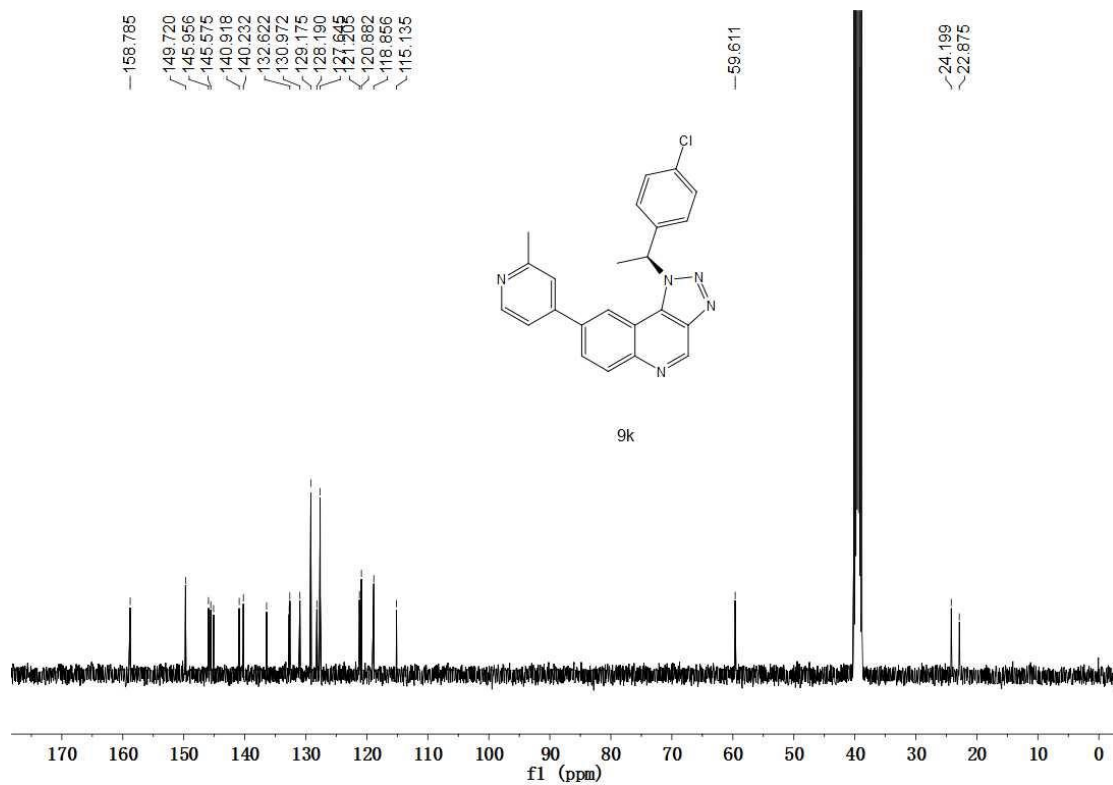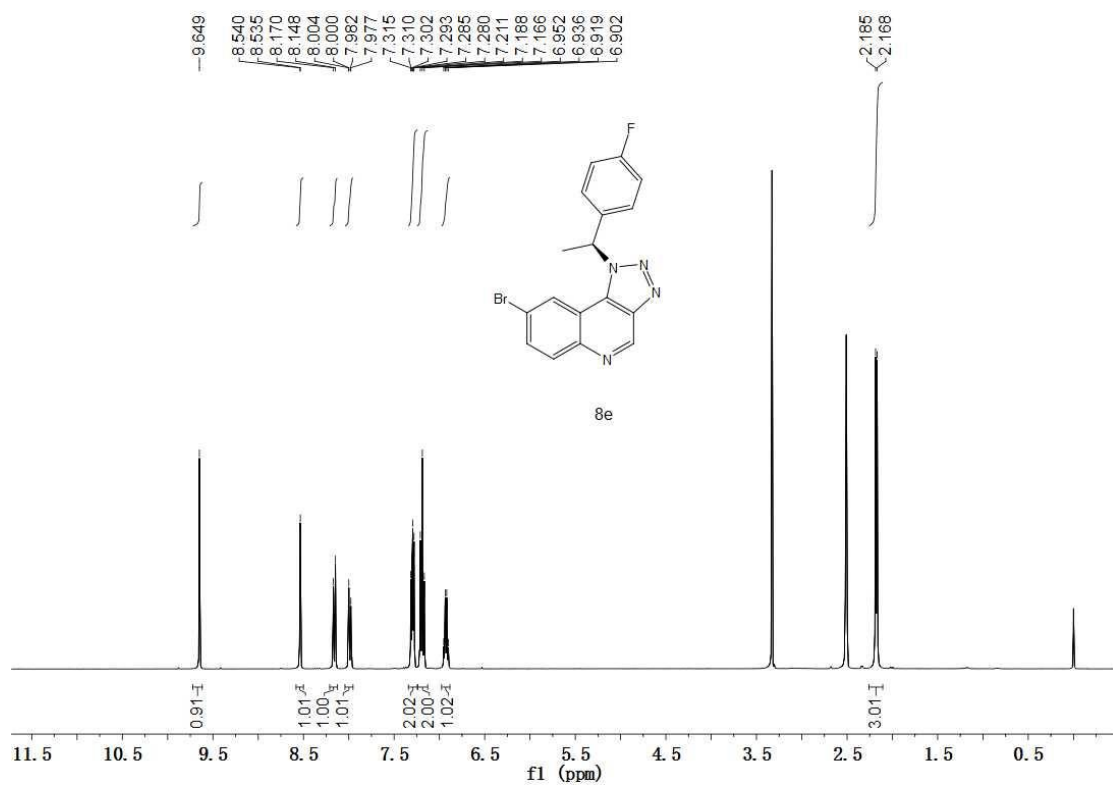

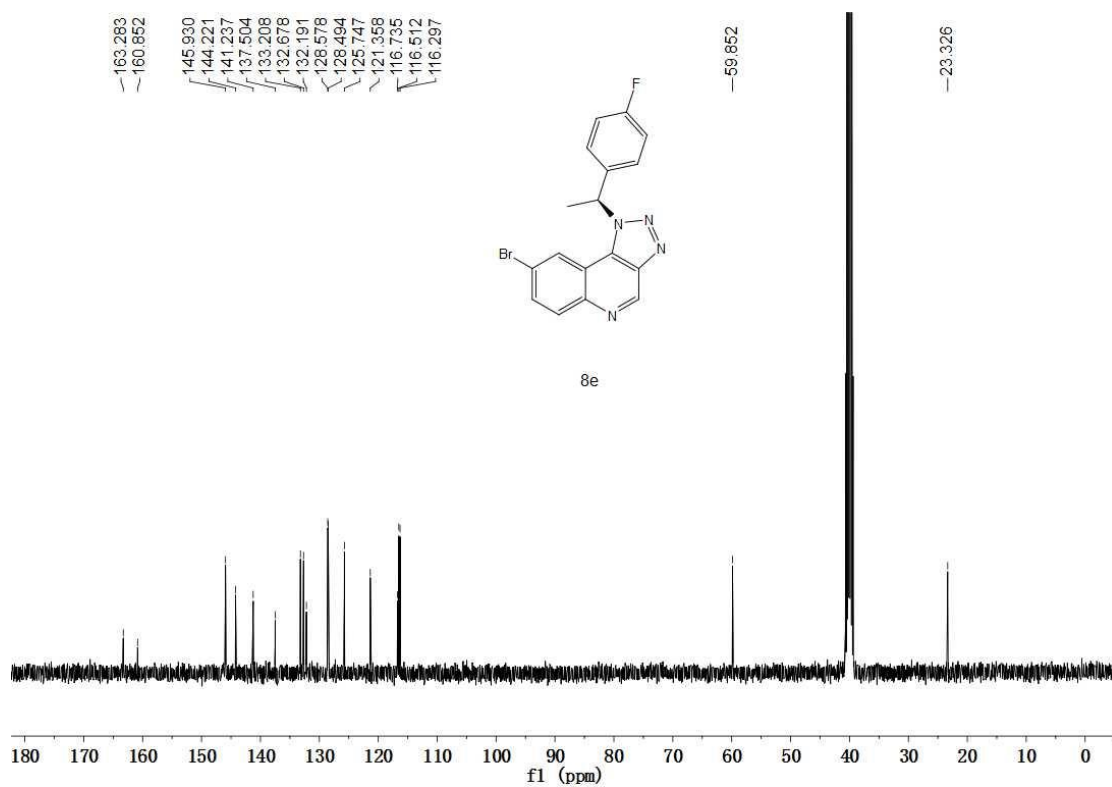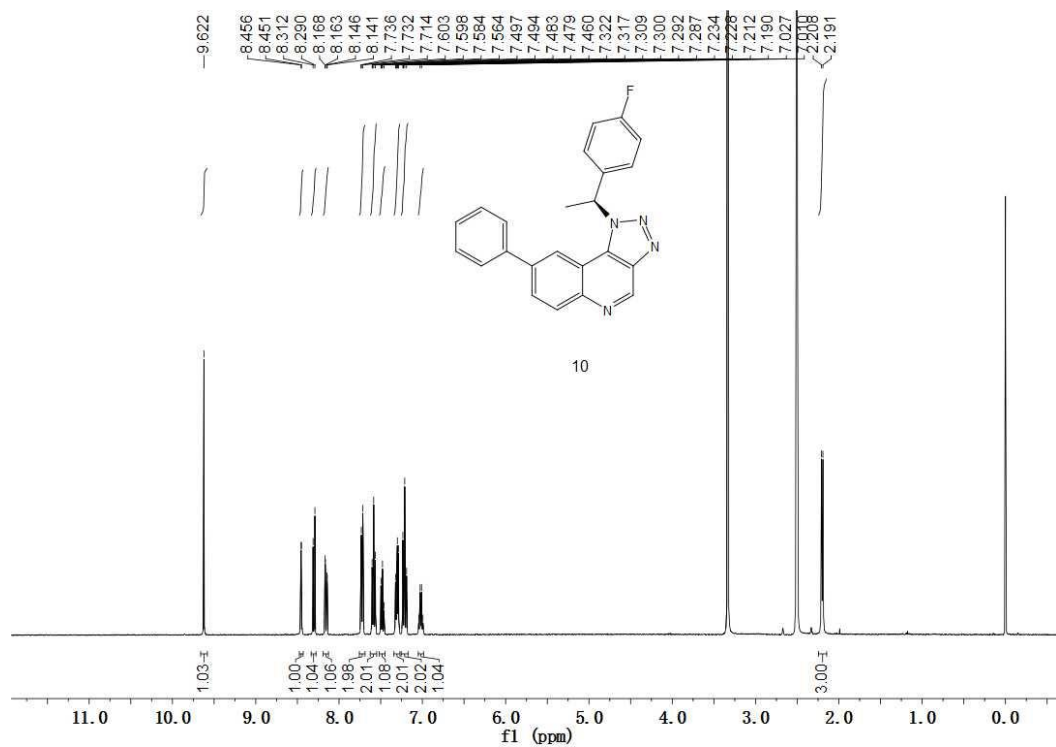

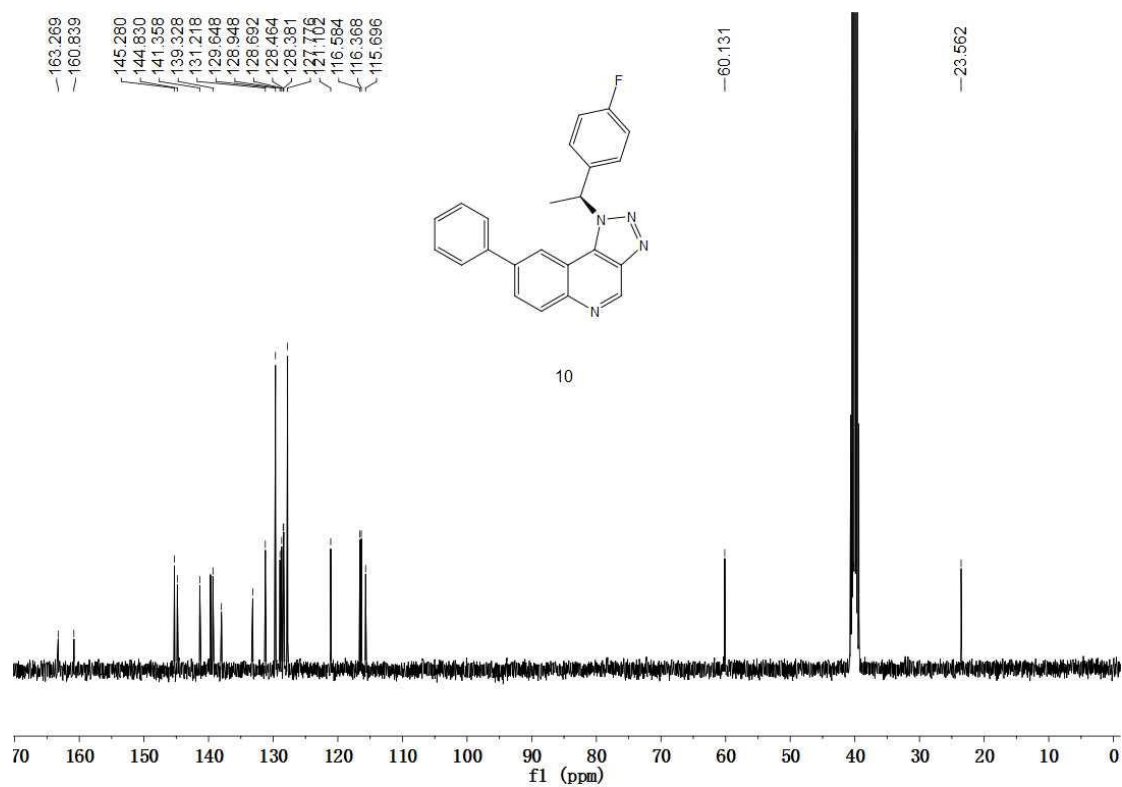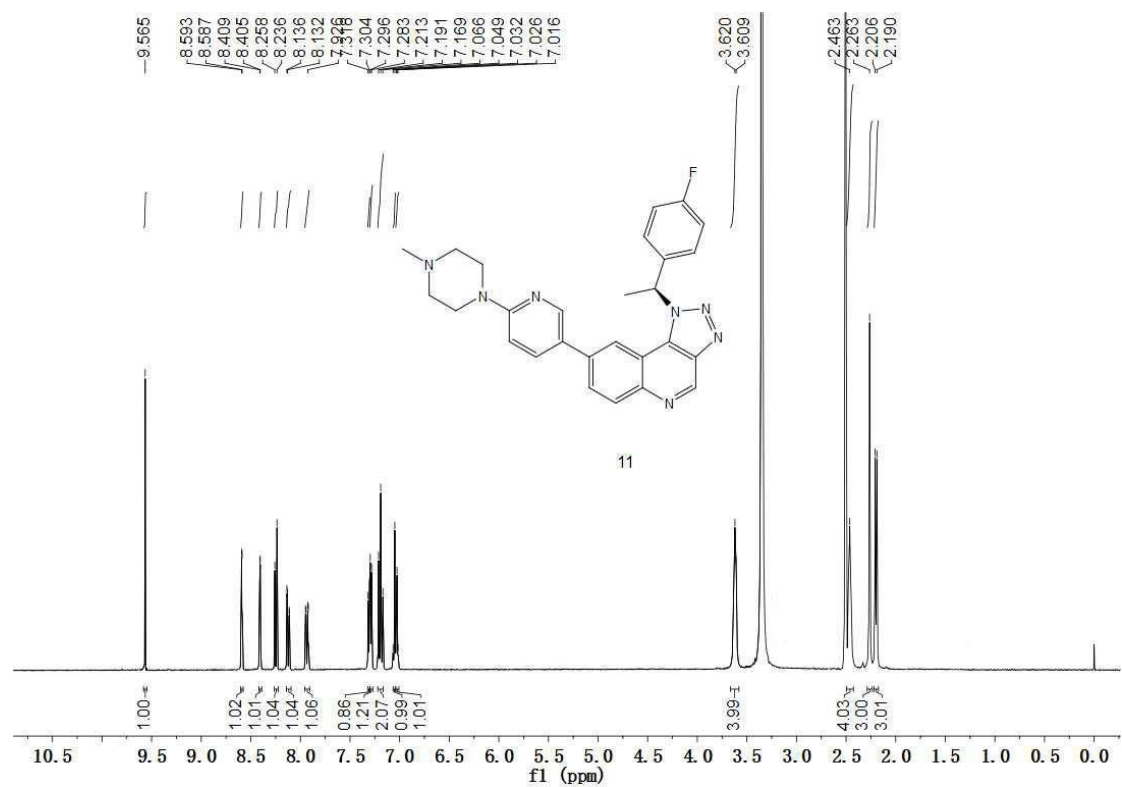

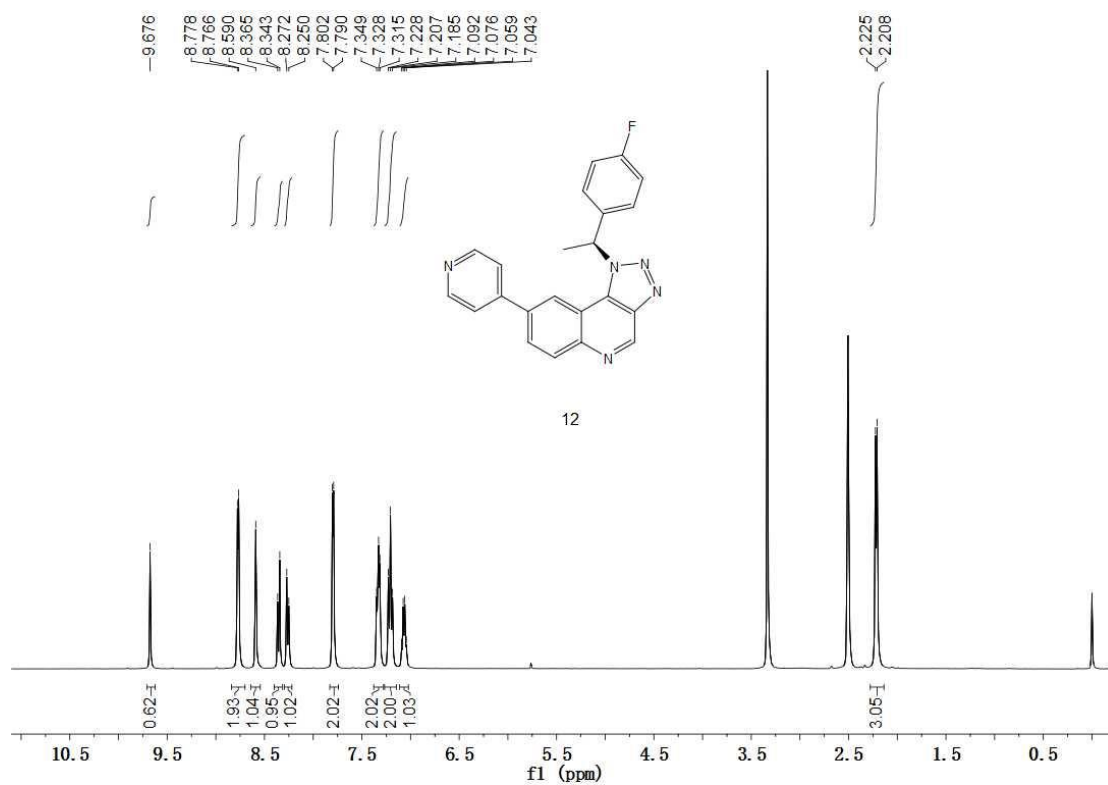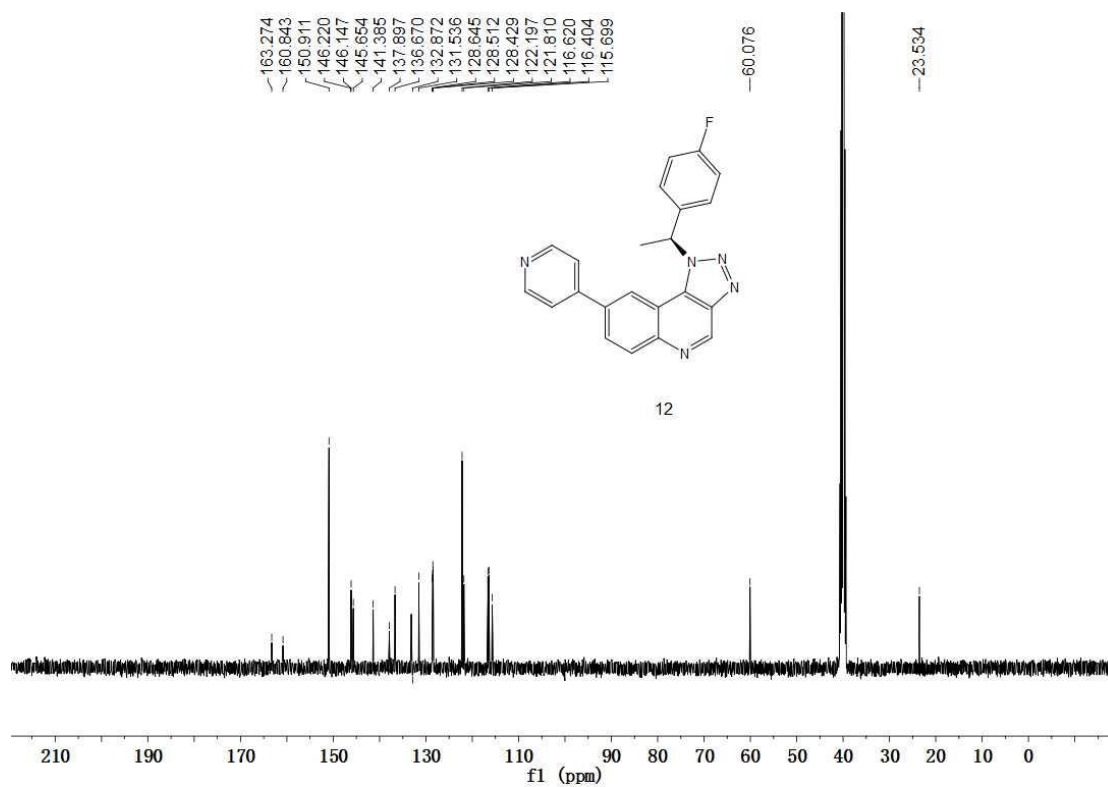

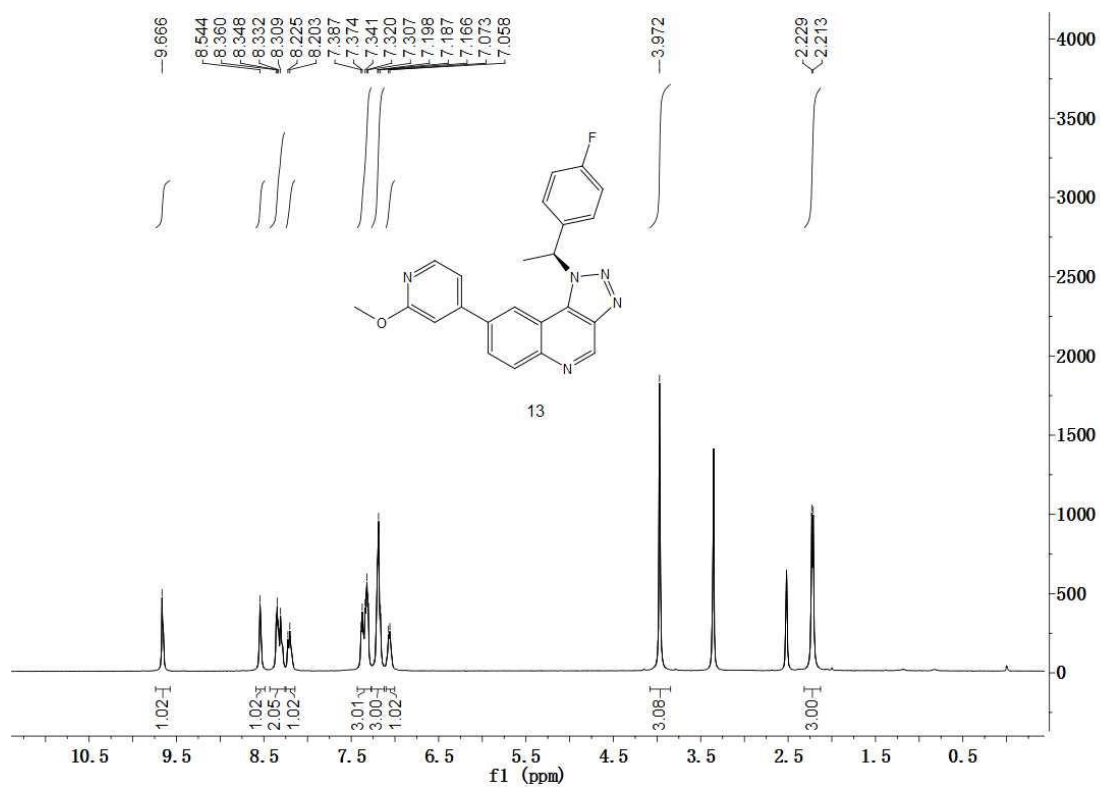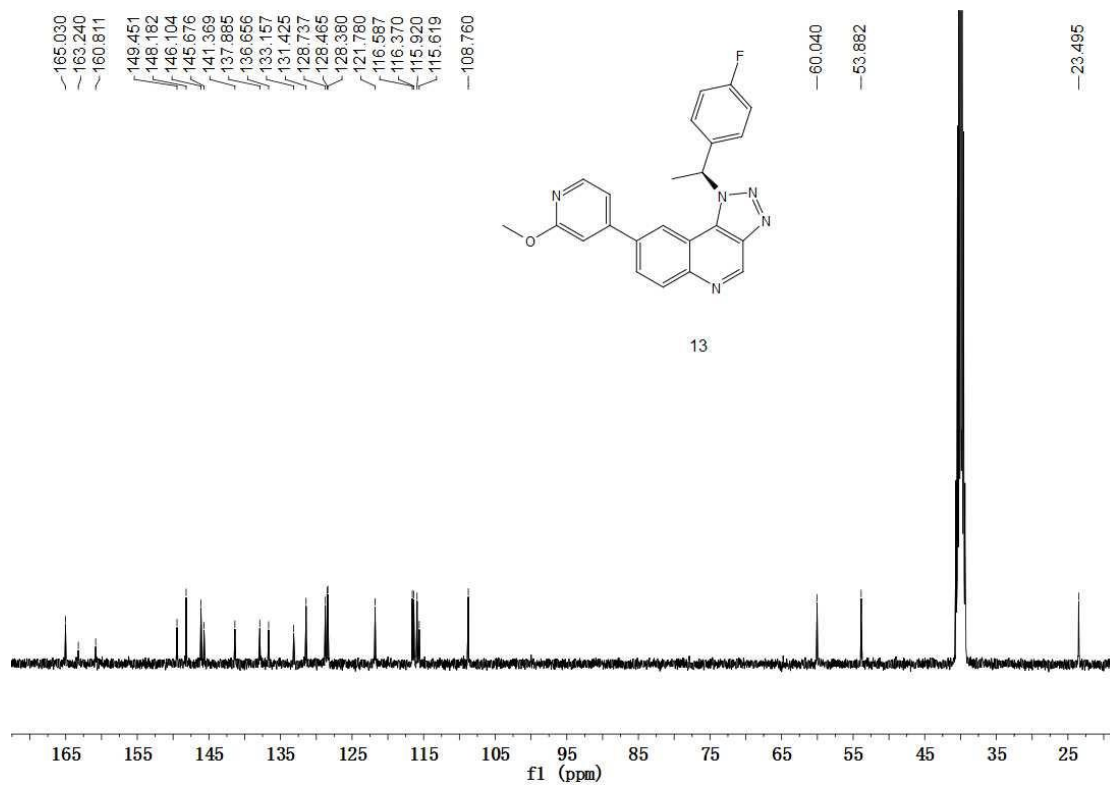



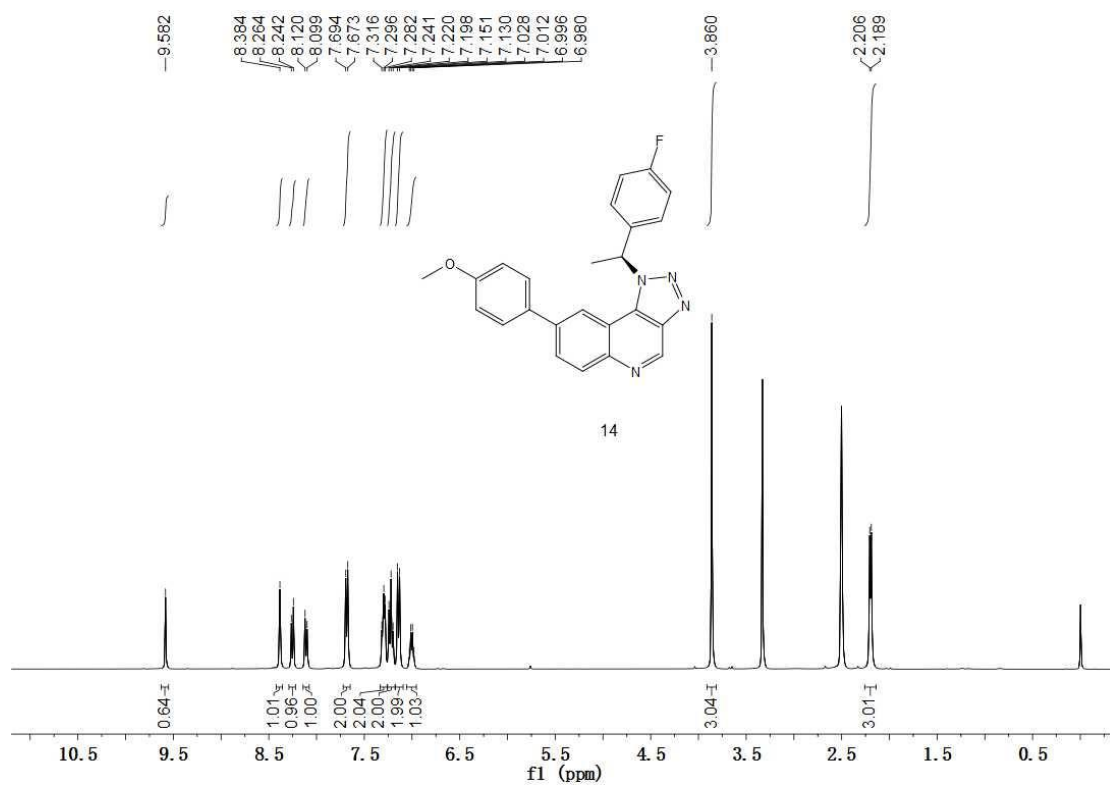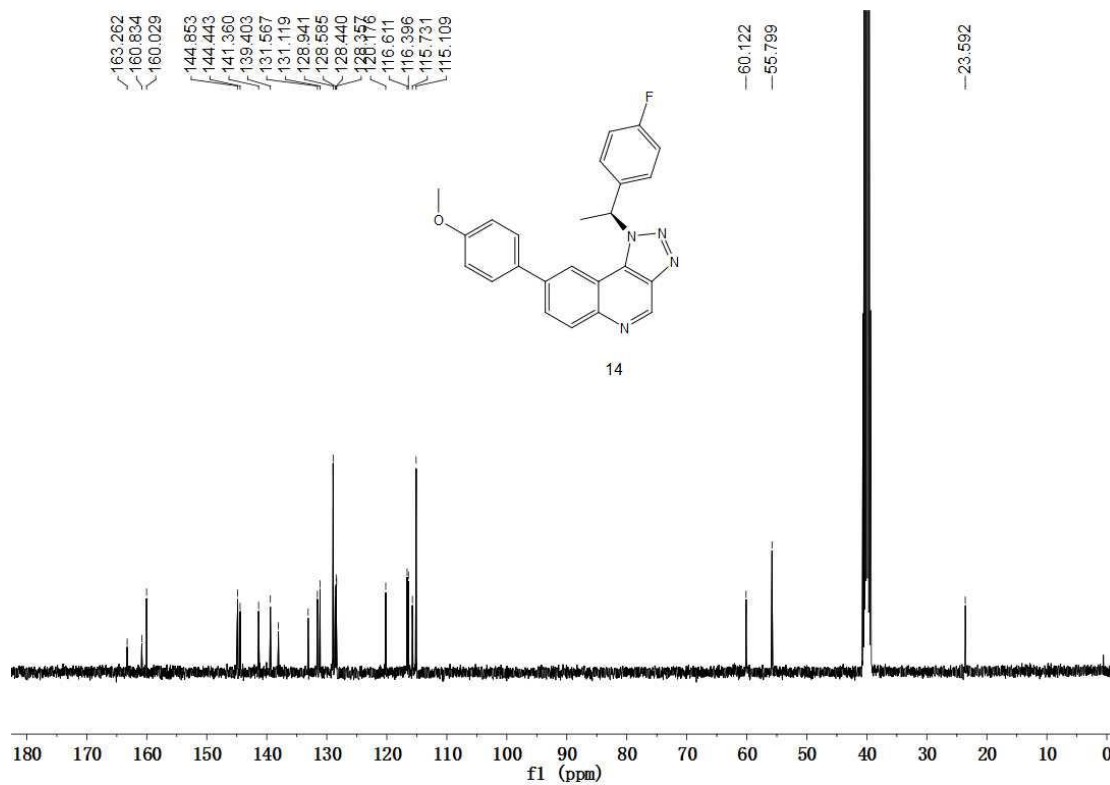

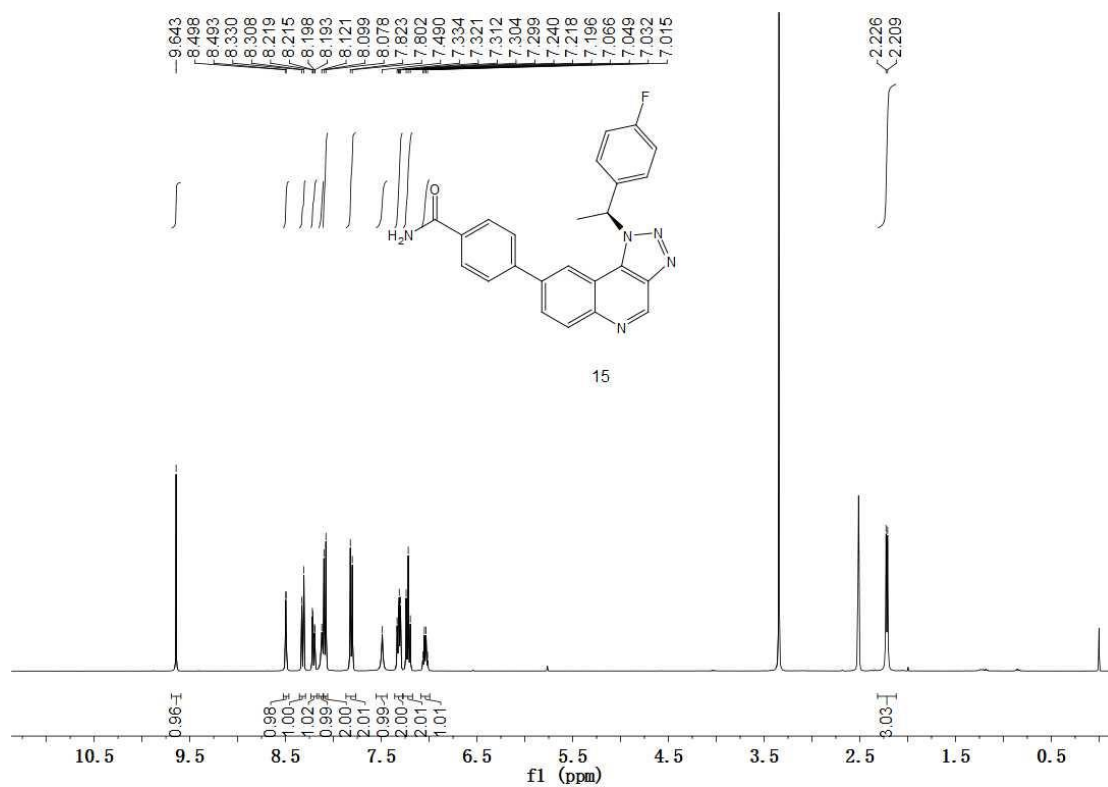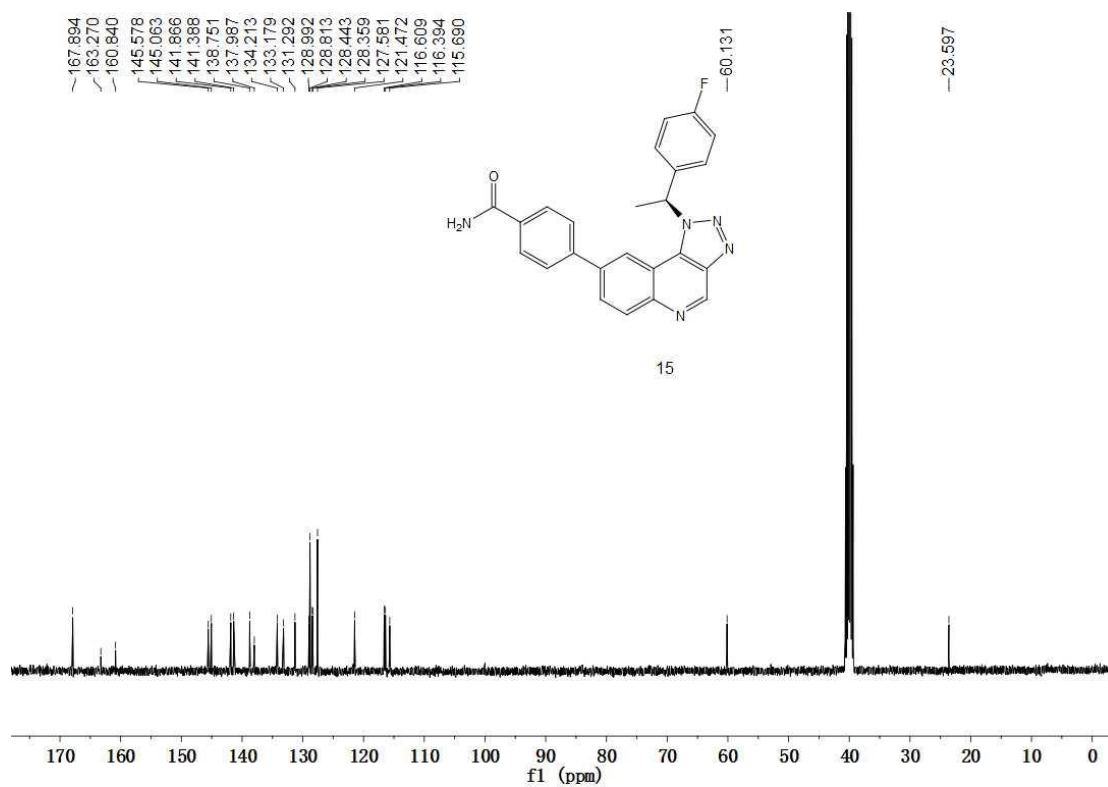

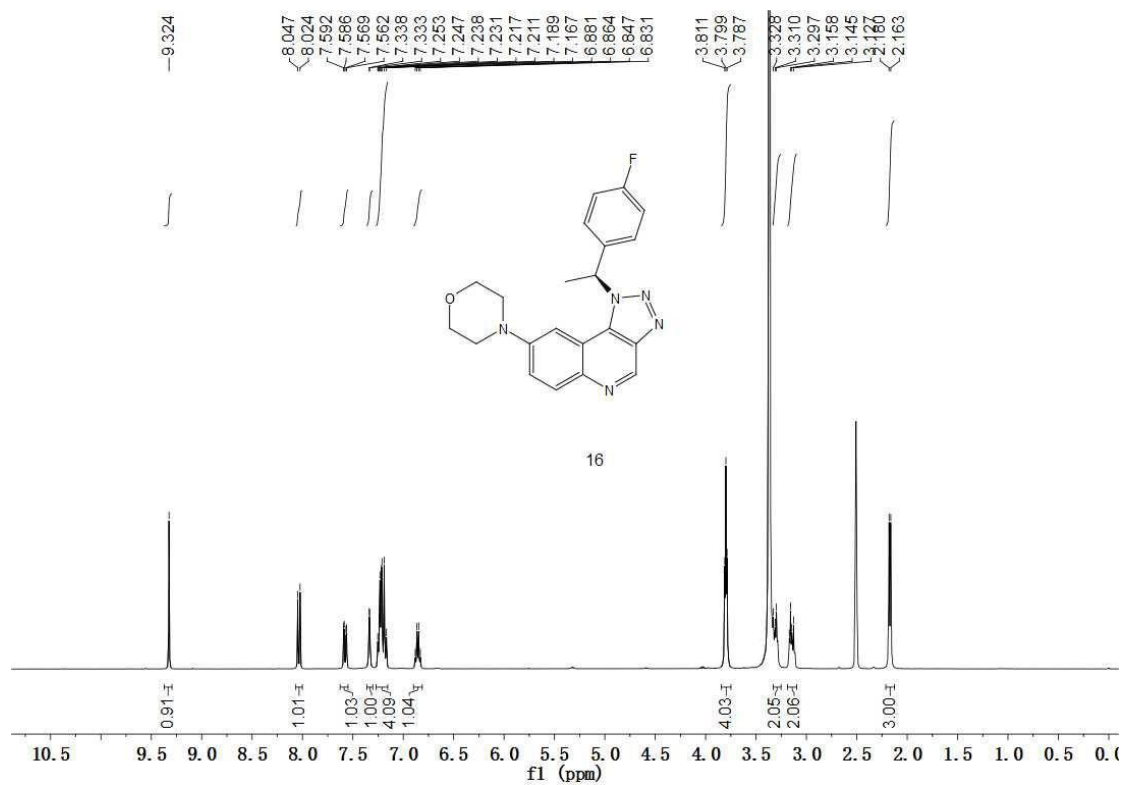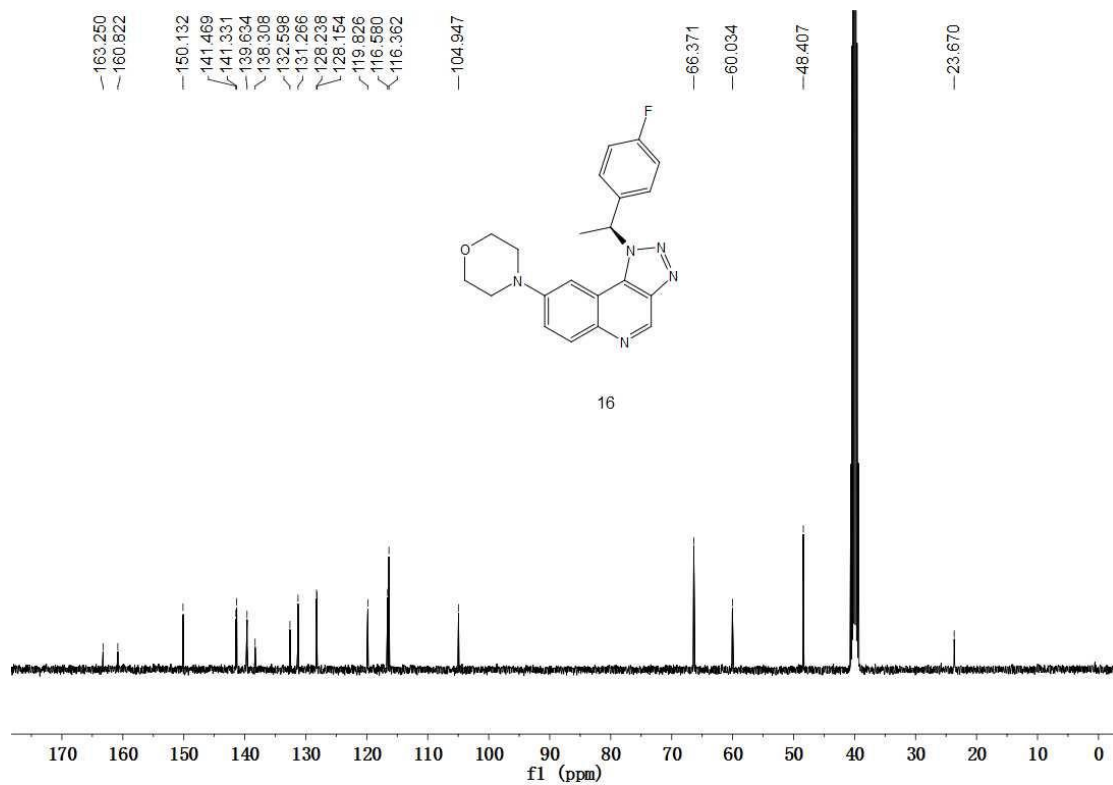

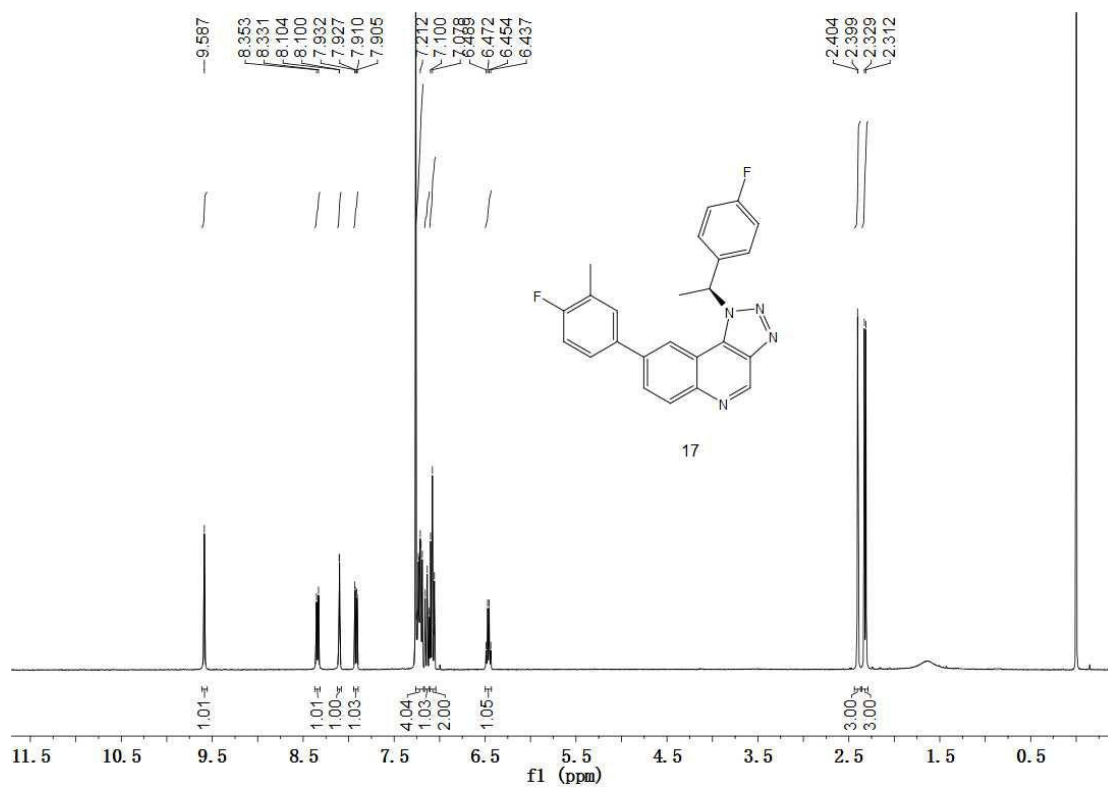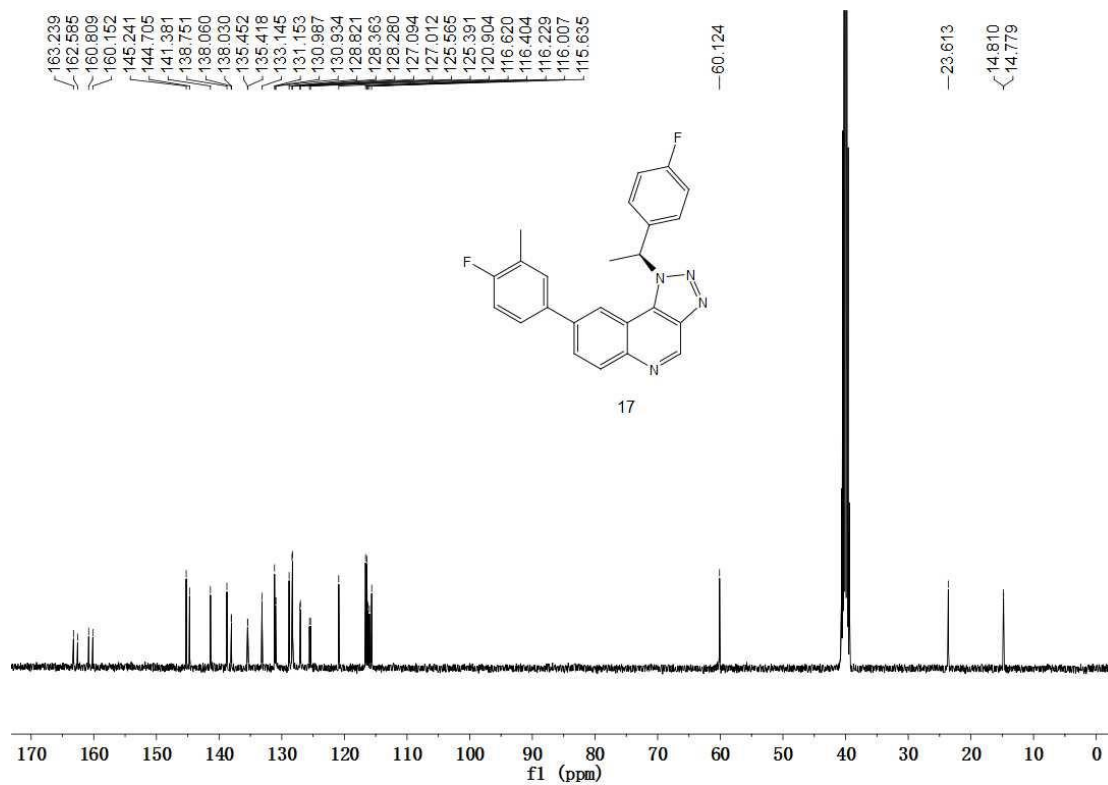

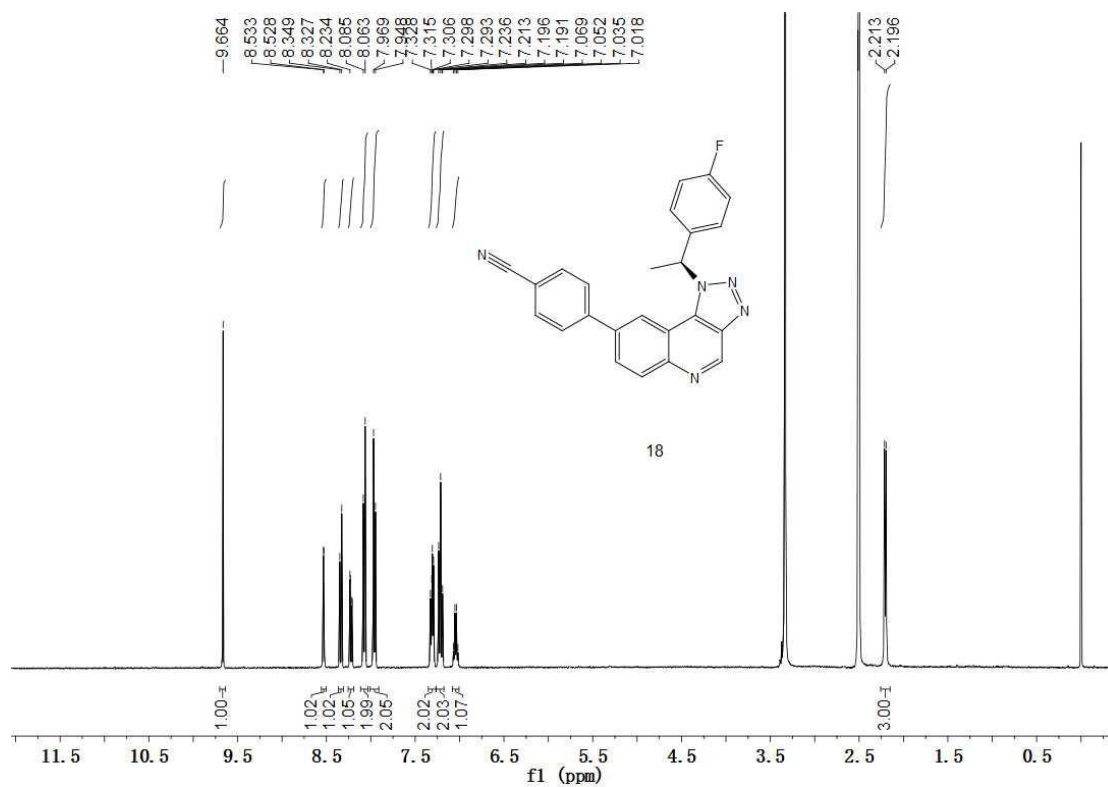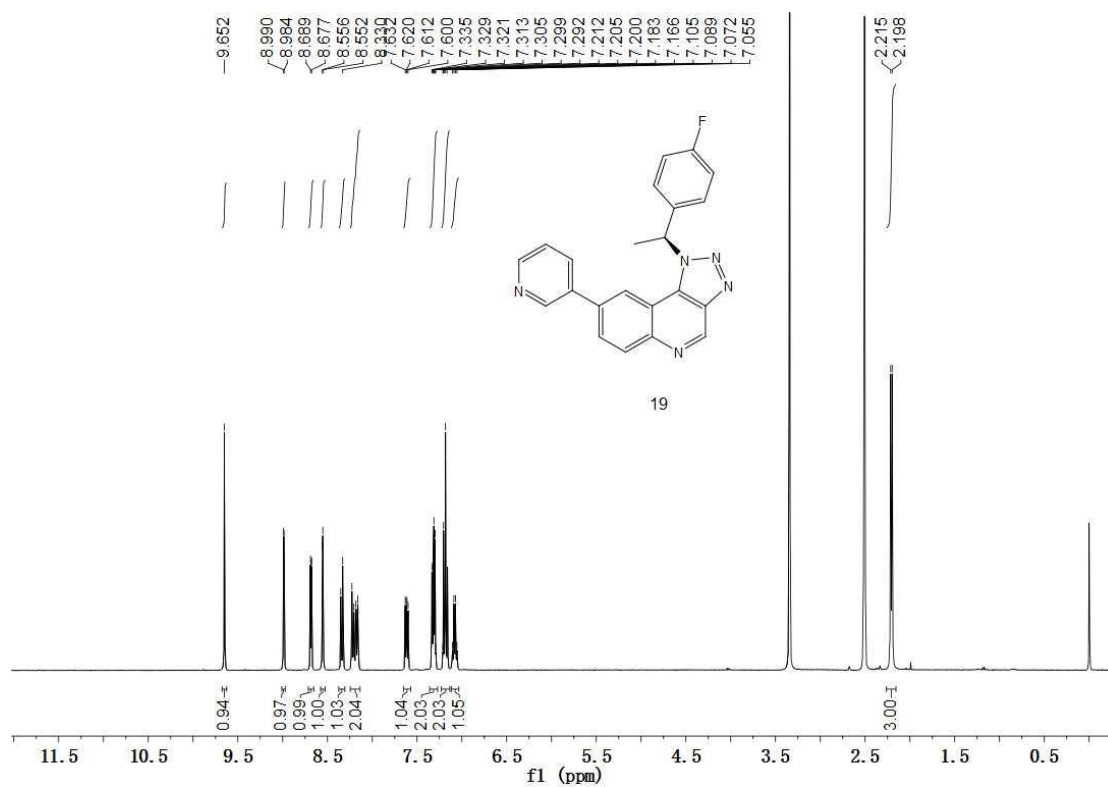

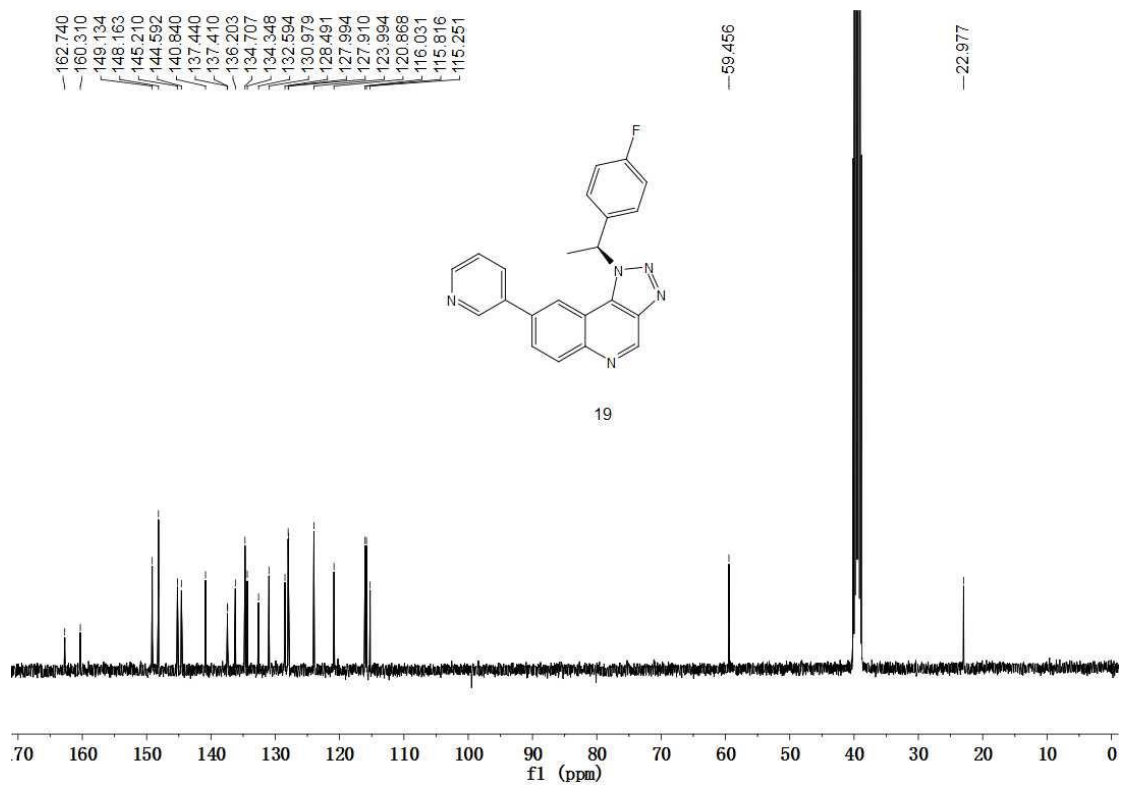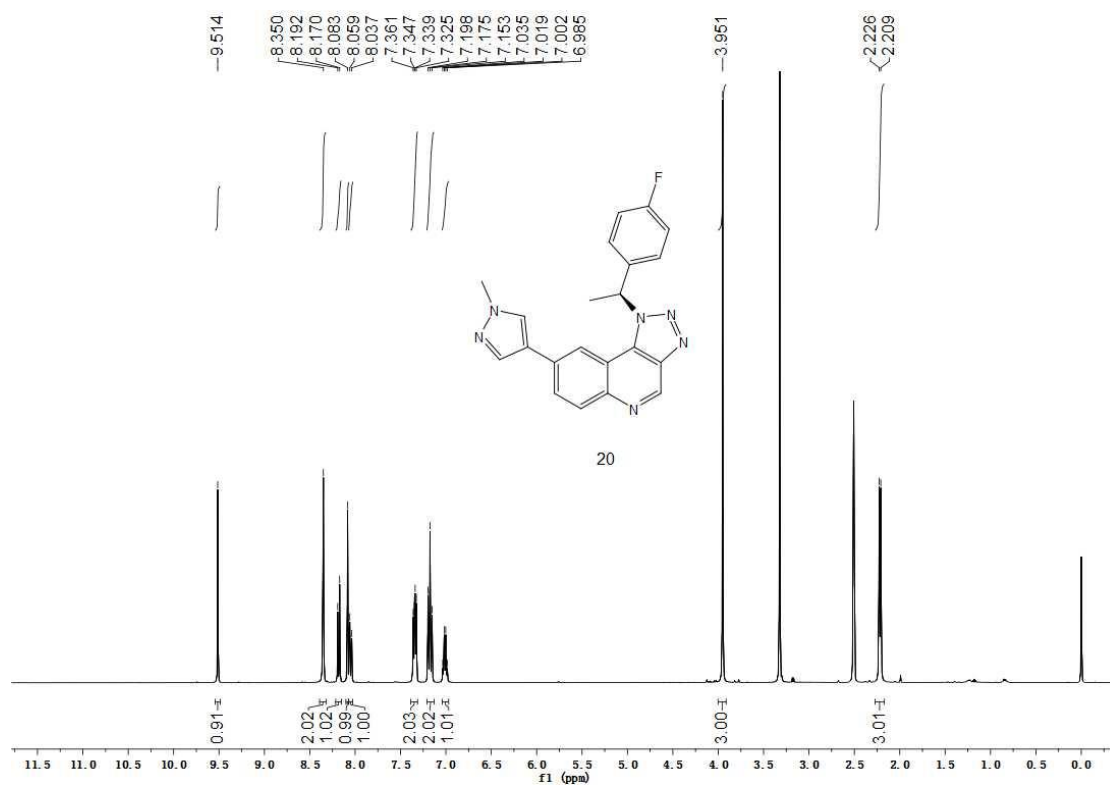

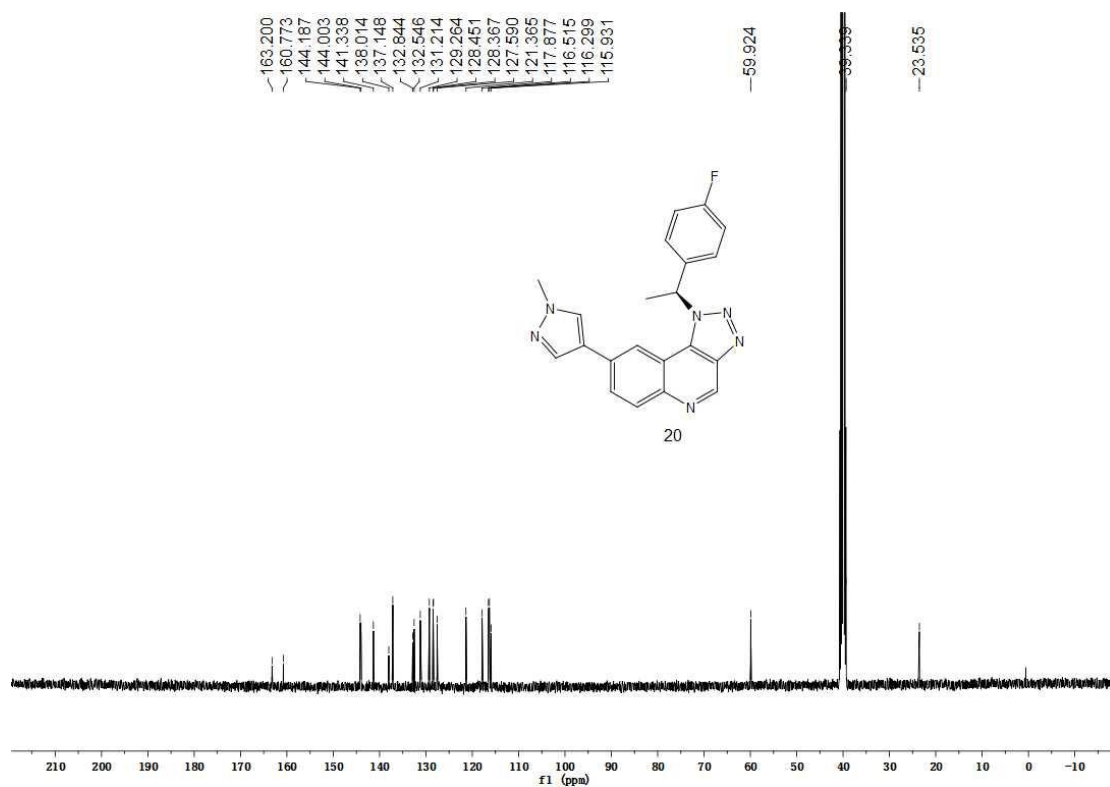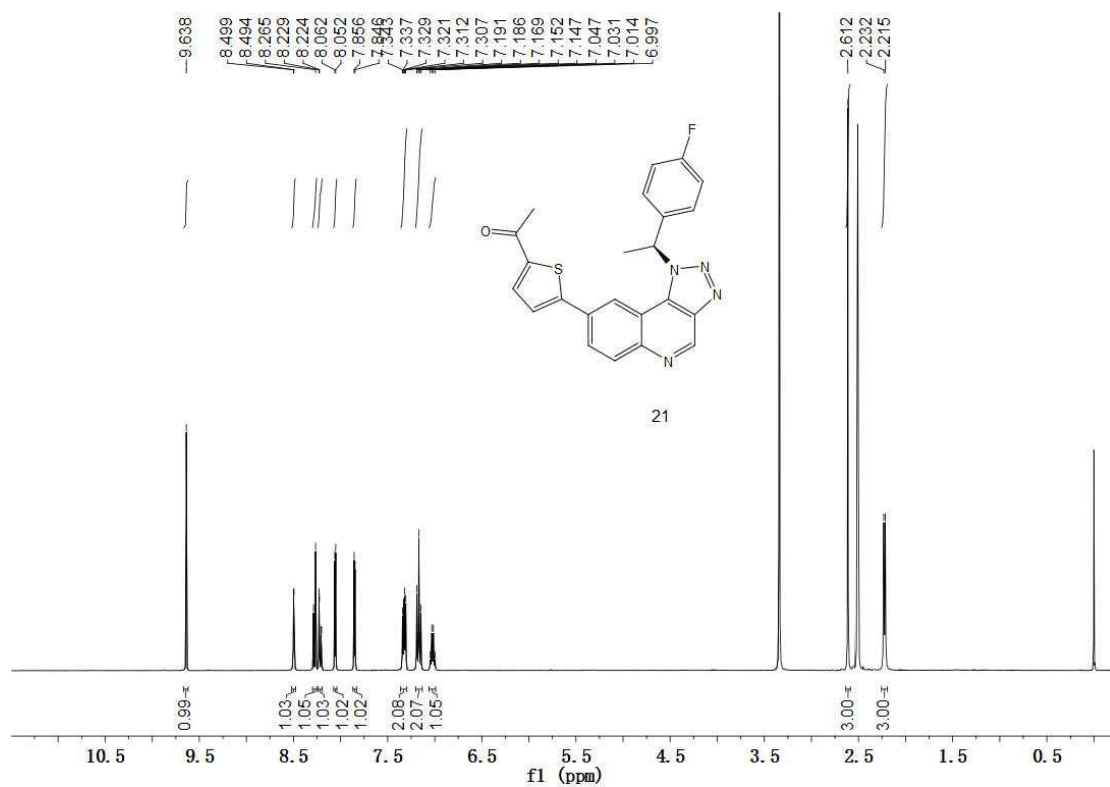

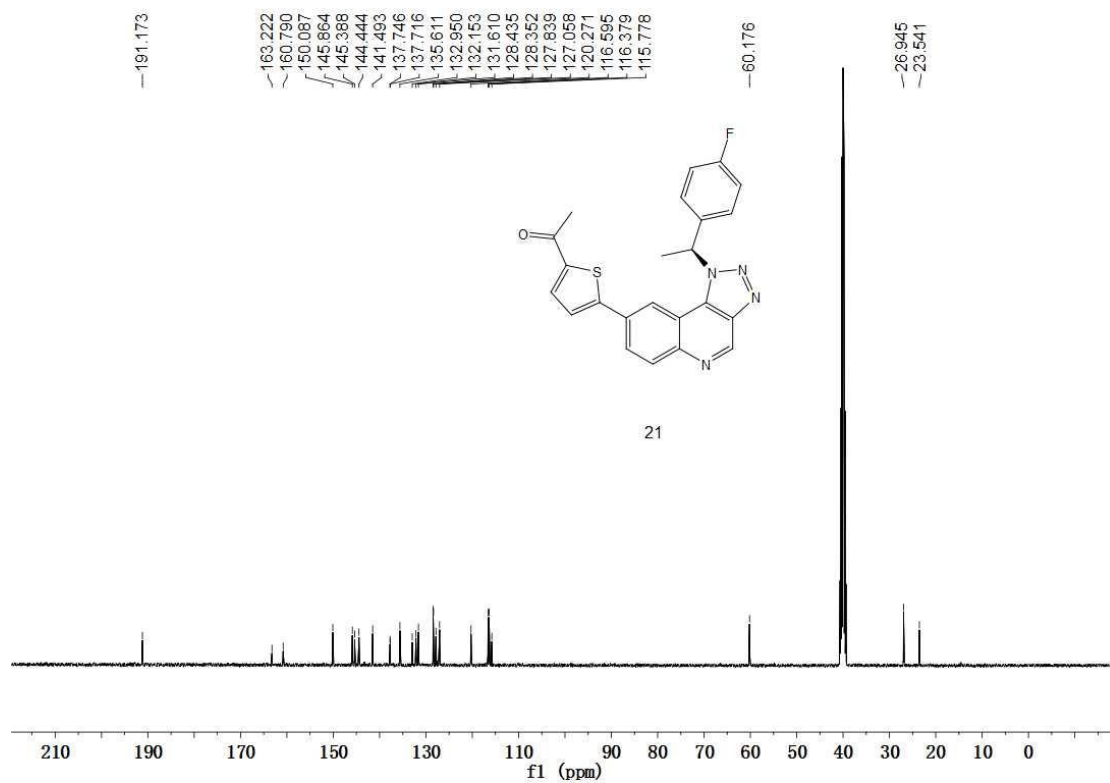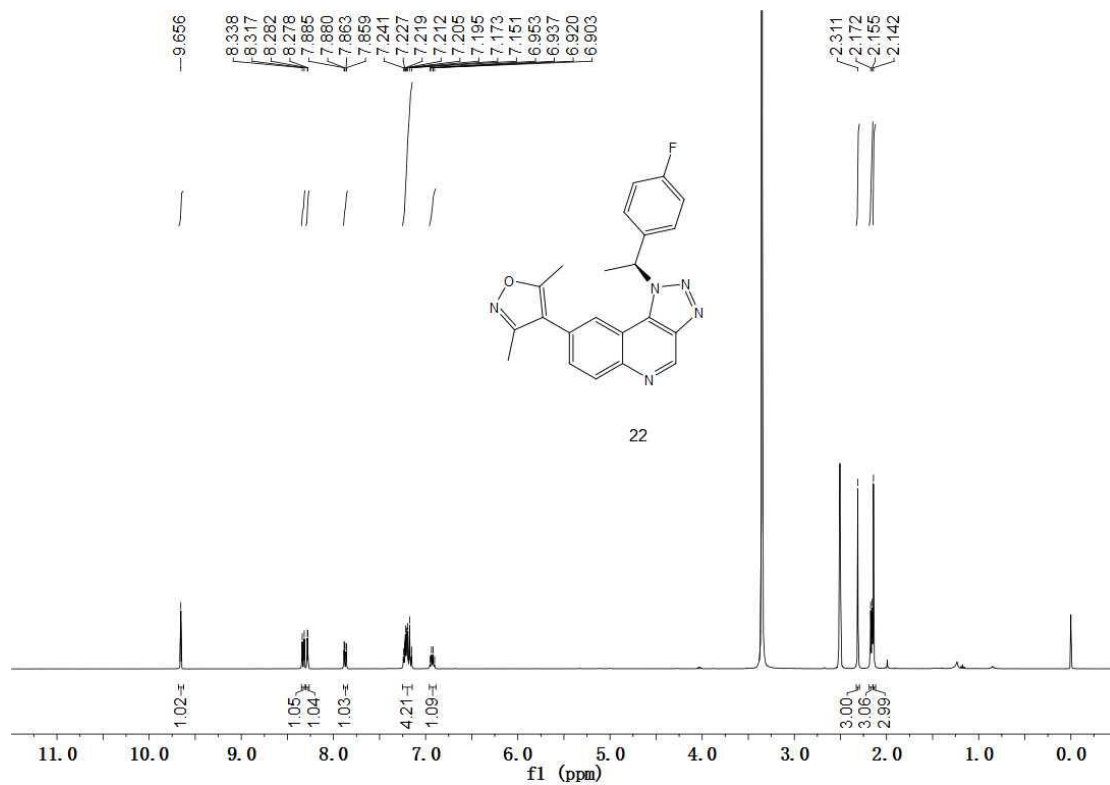



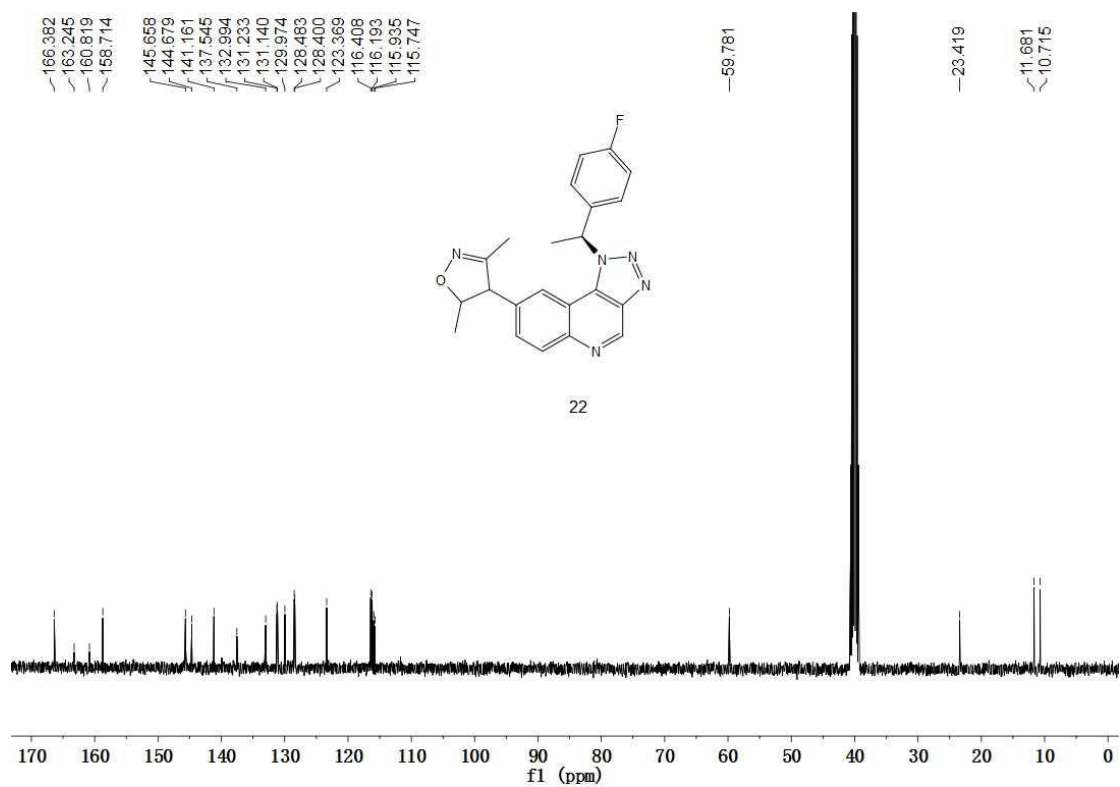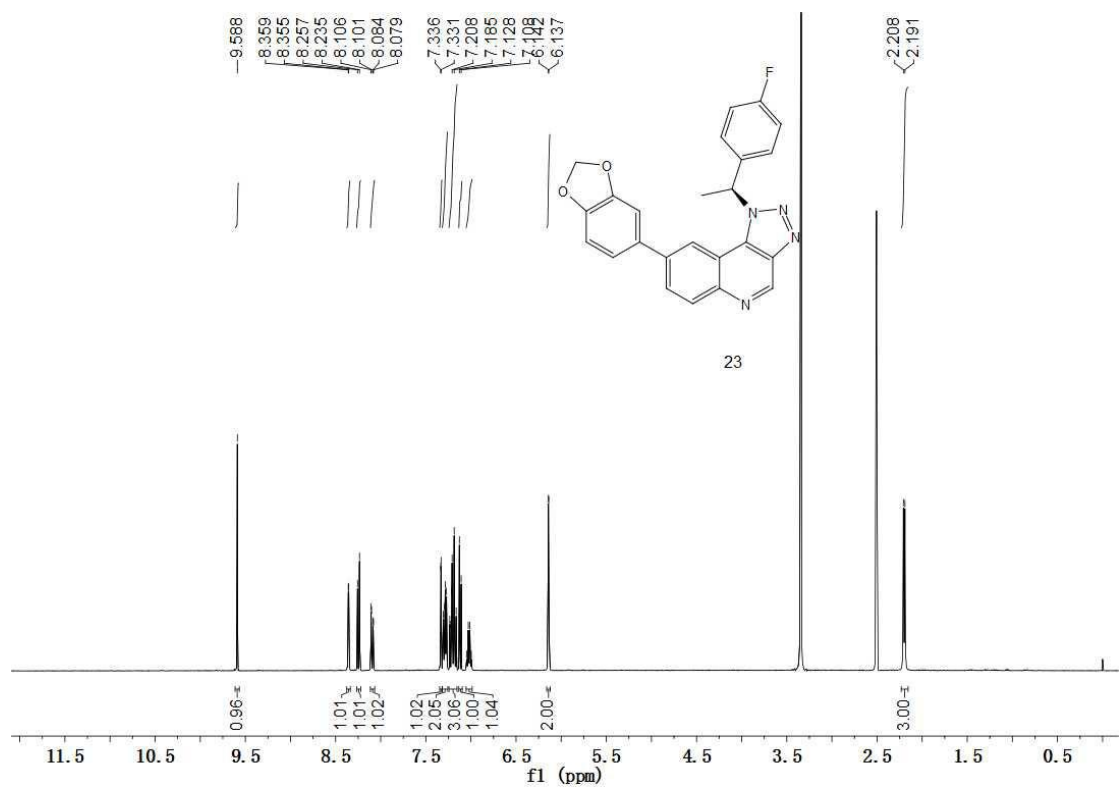

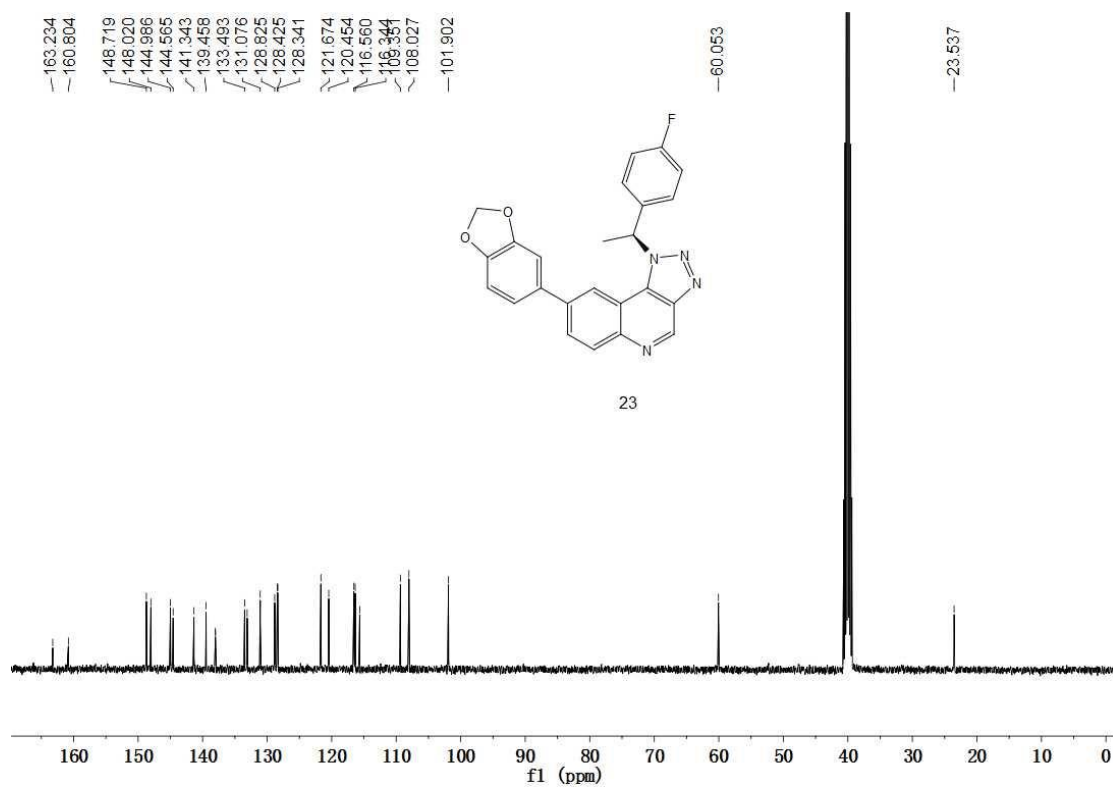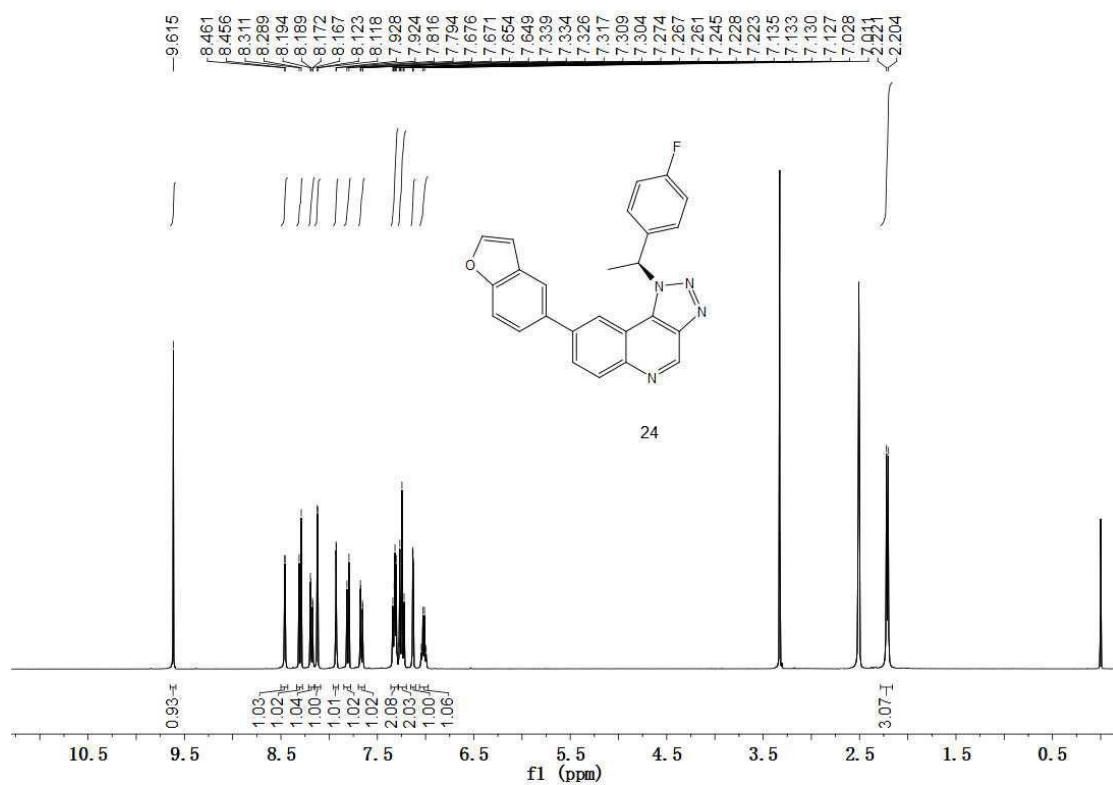

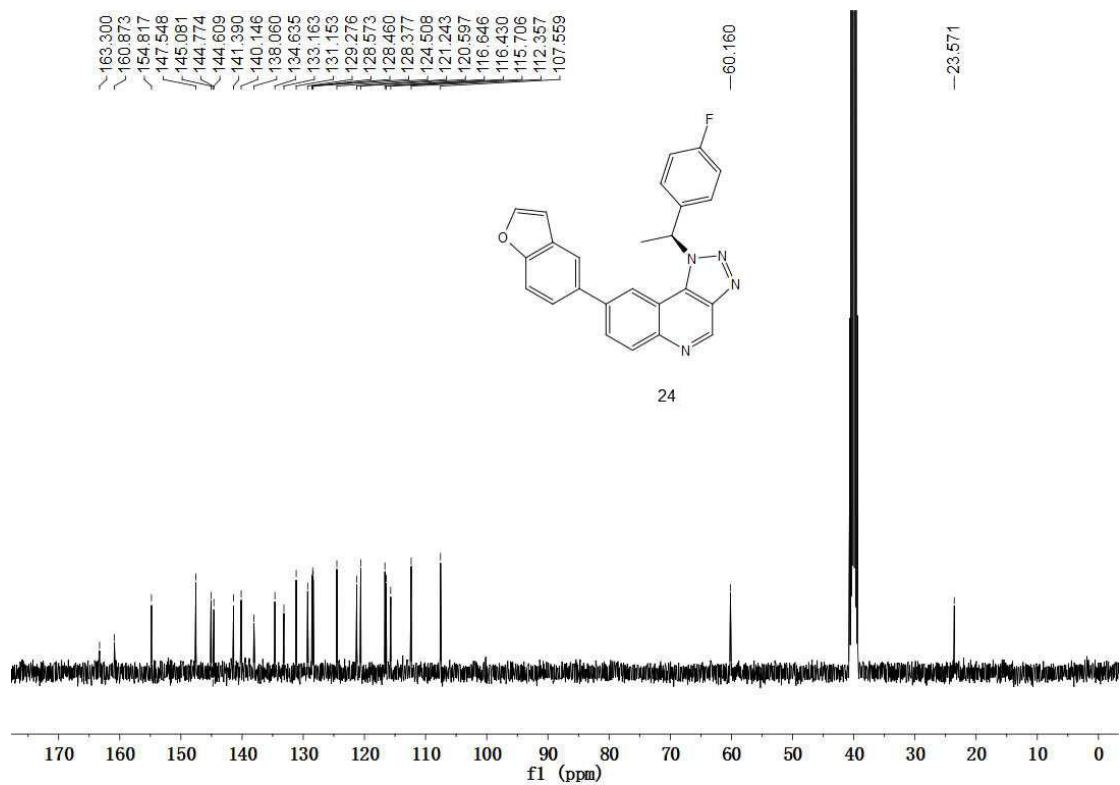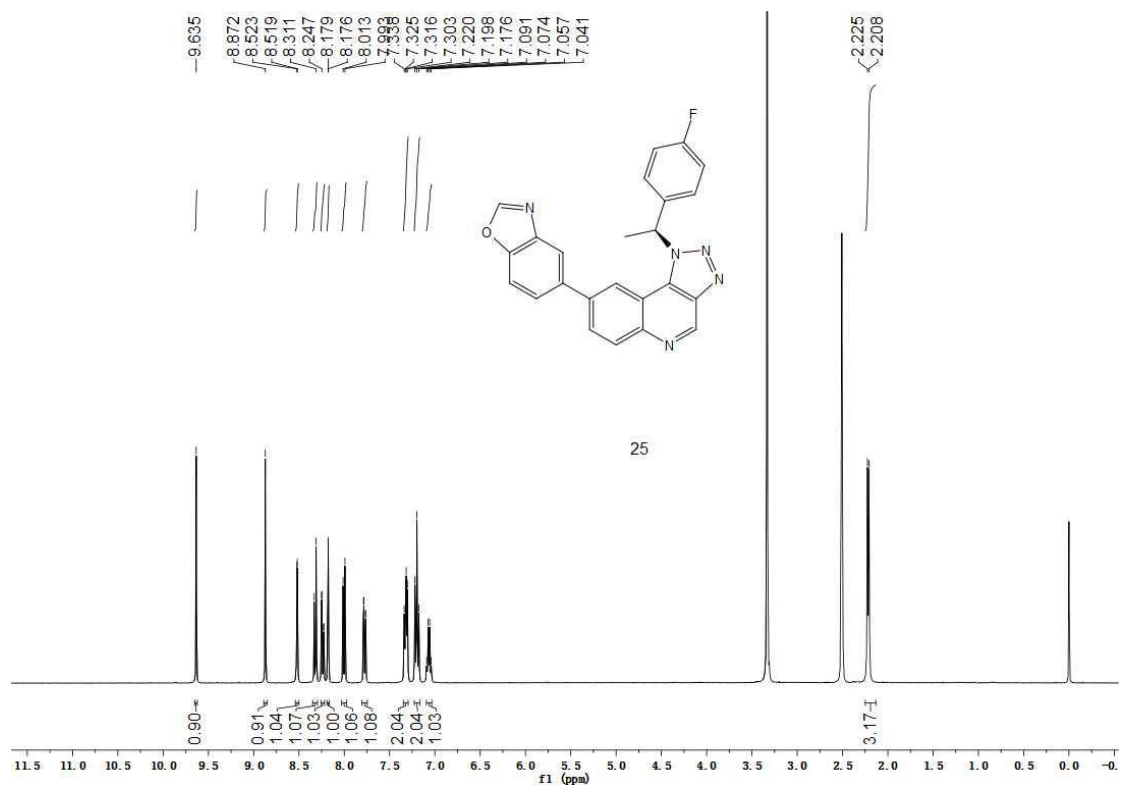

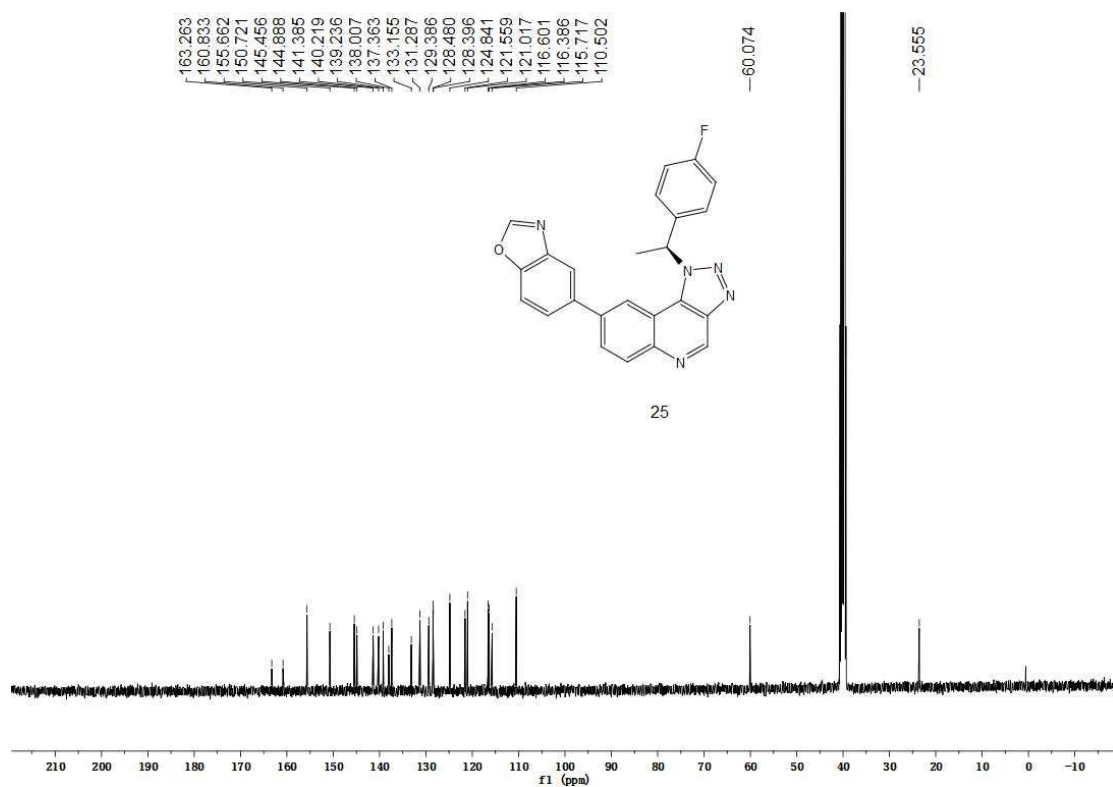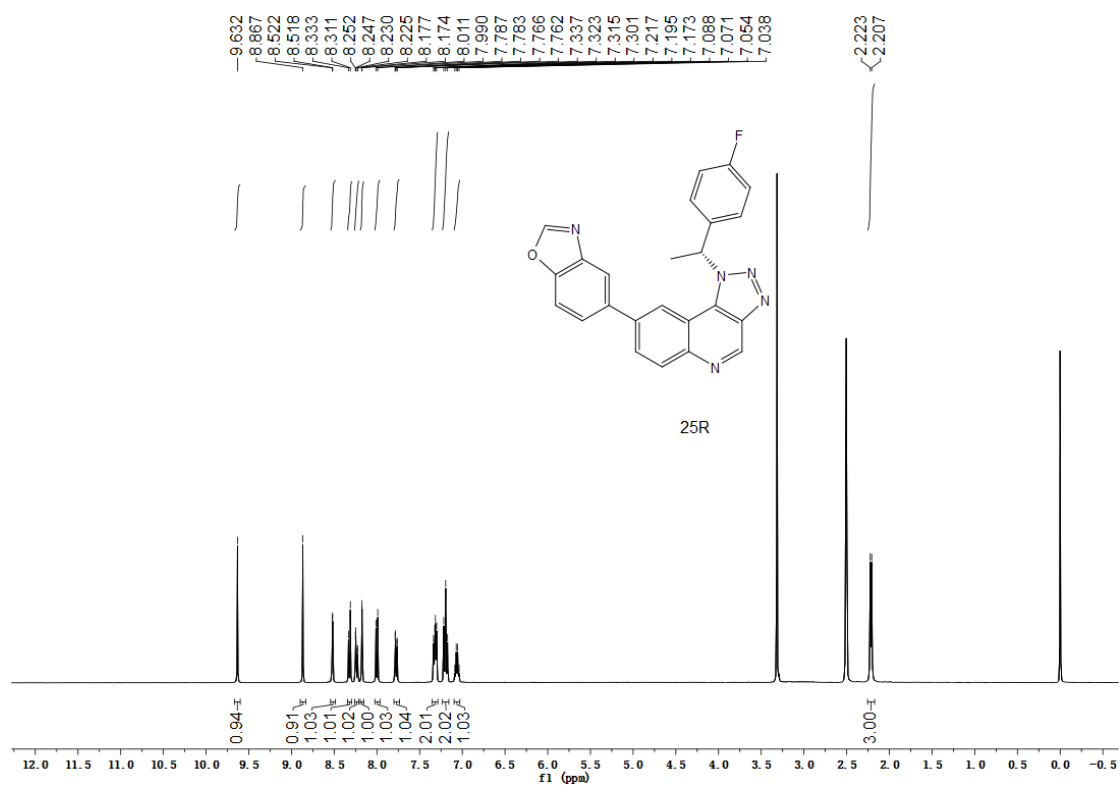

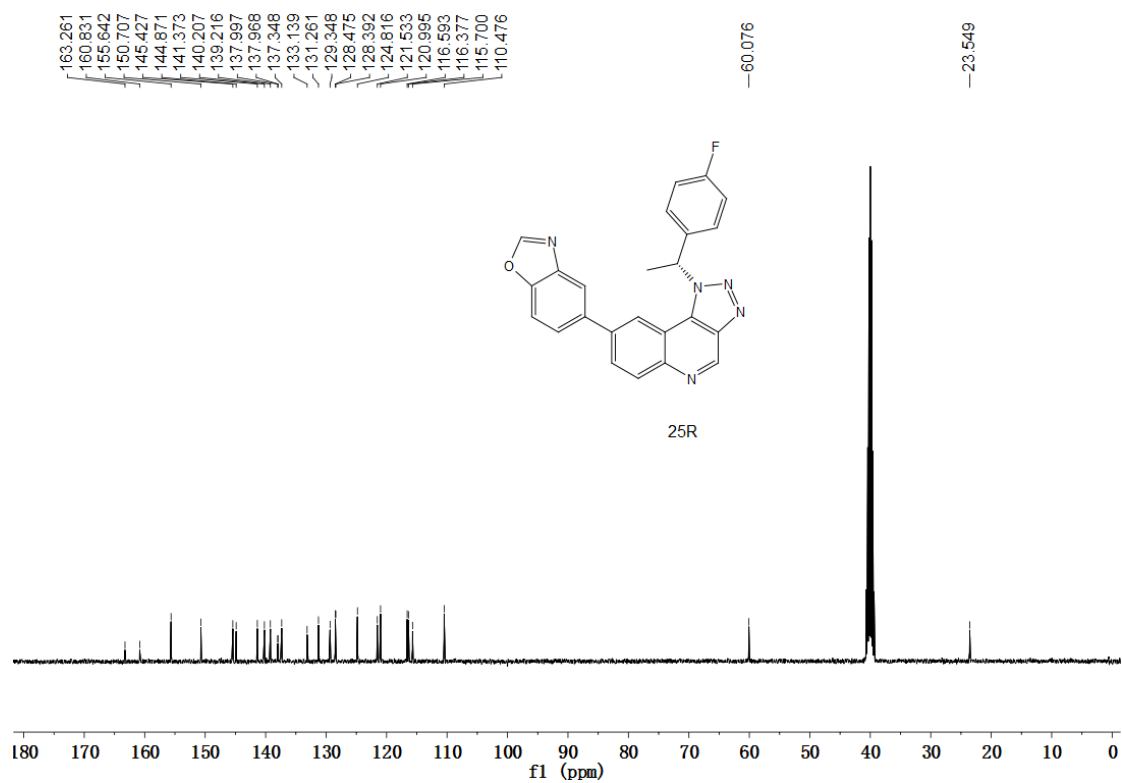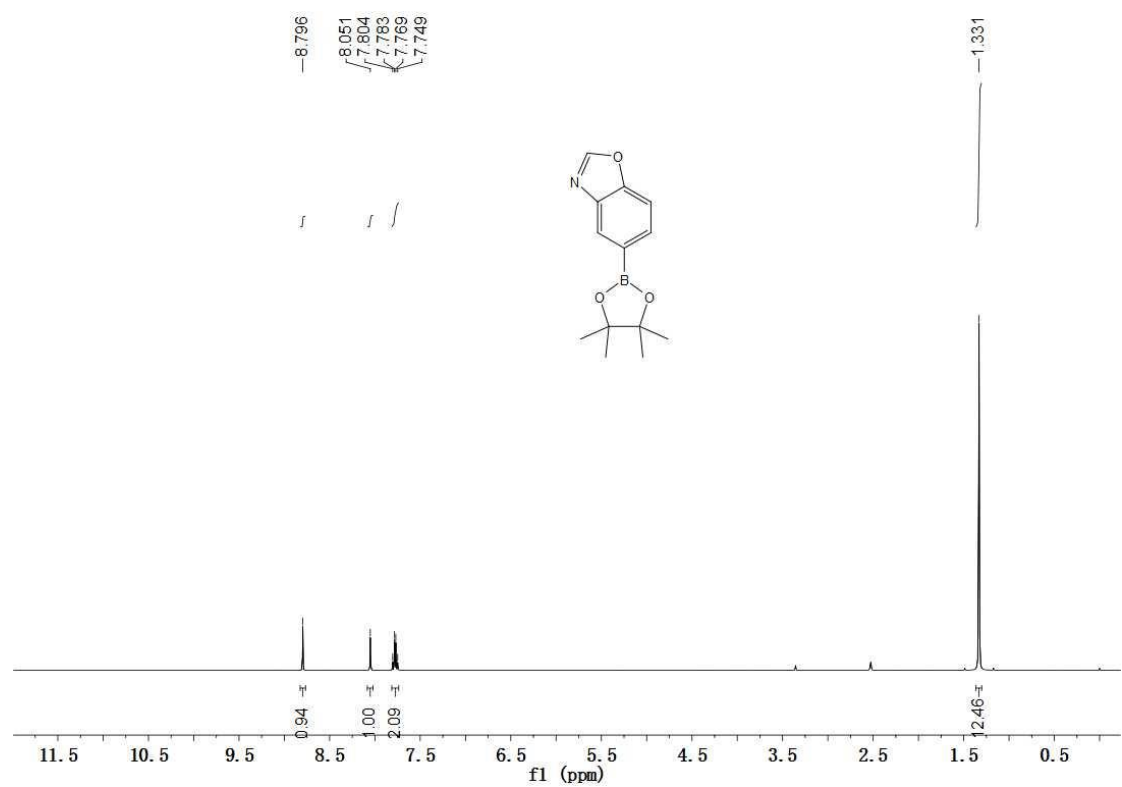

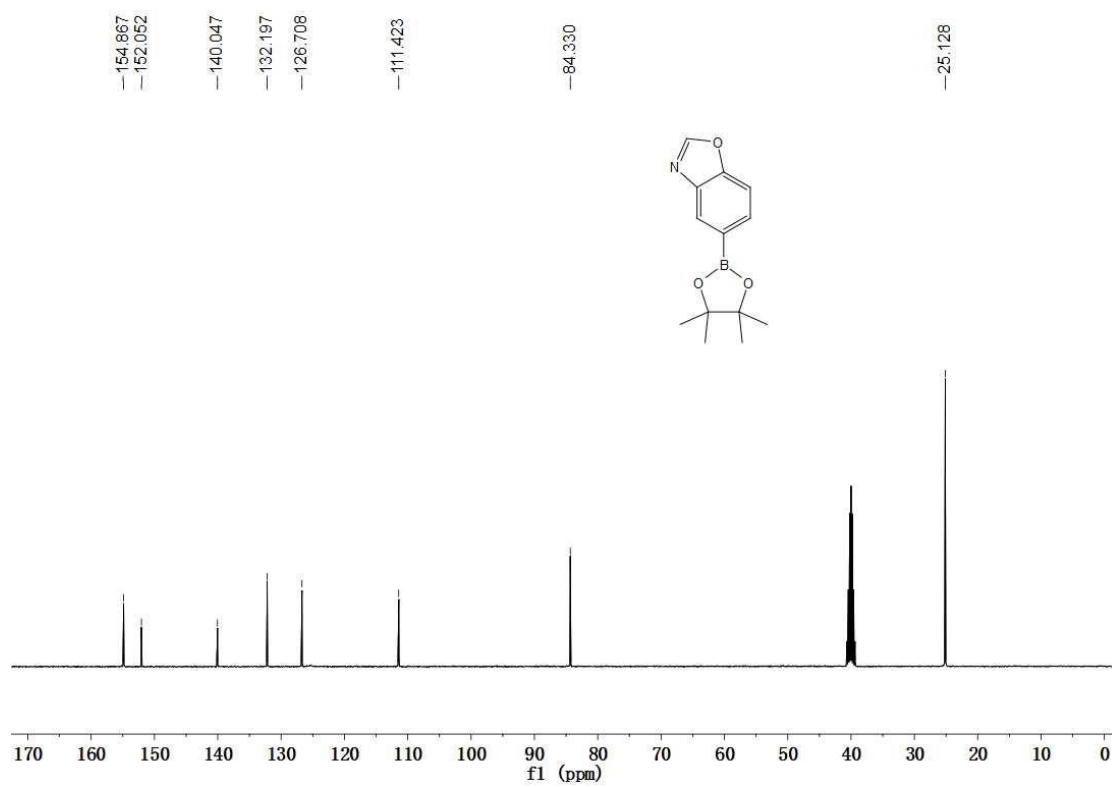

## Copies of MS Spectra

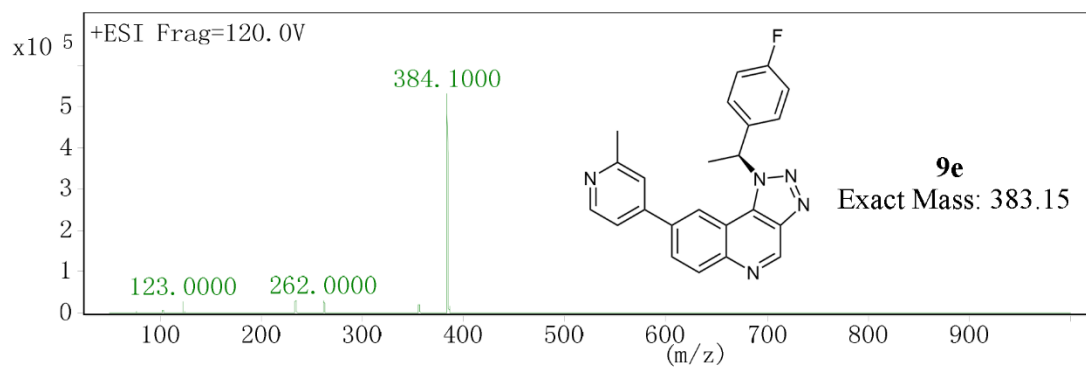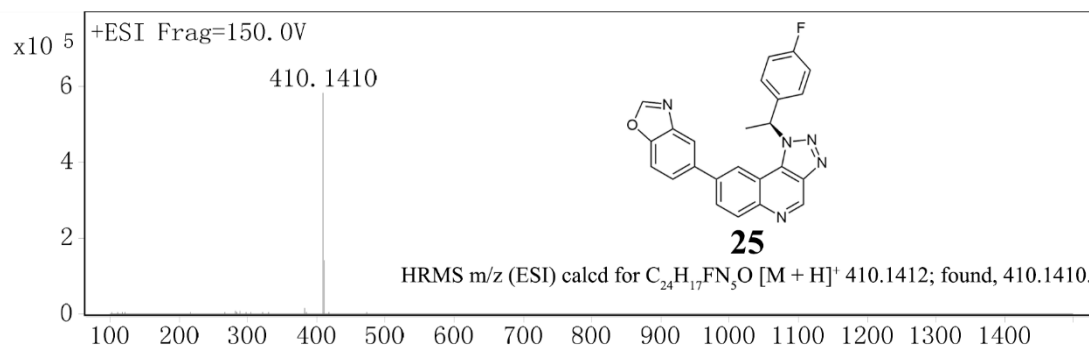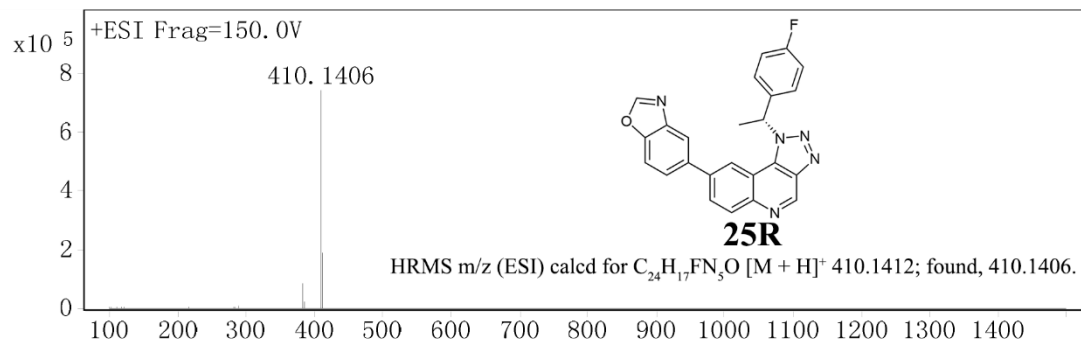

## HPLC Purity Analysis for Compound 25

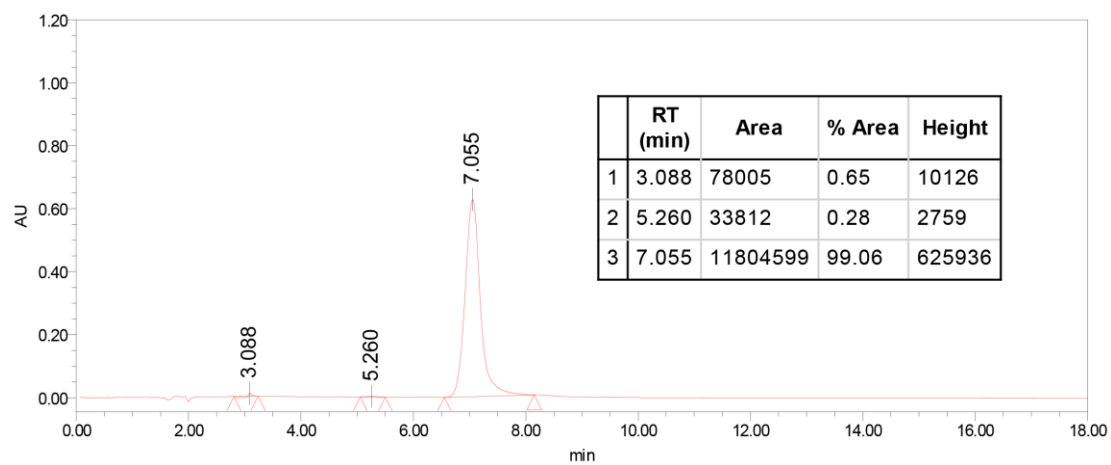



## Confirmation of Enantiomeric Purity of Compound 25

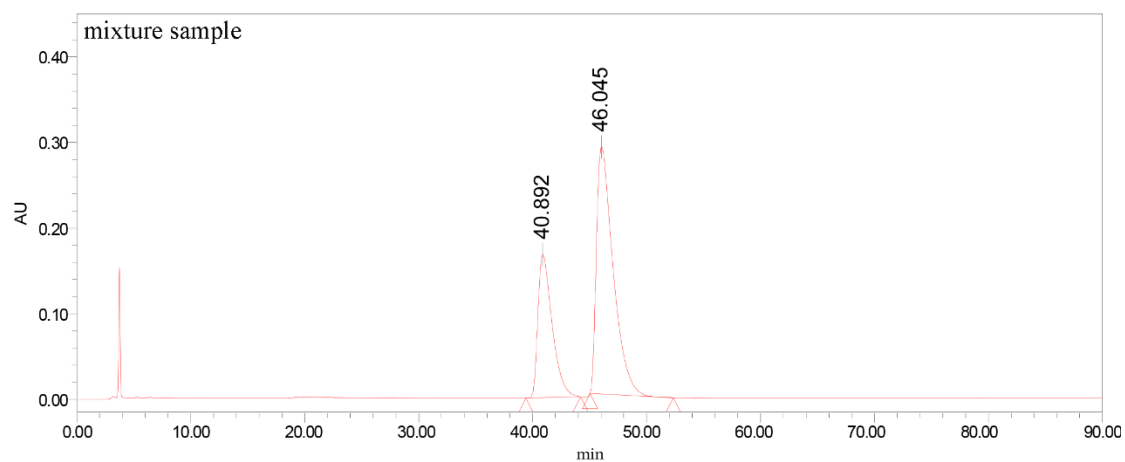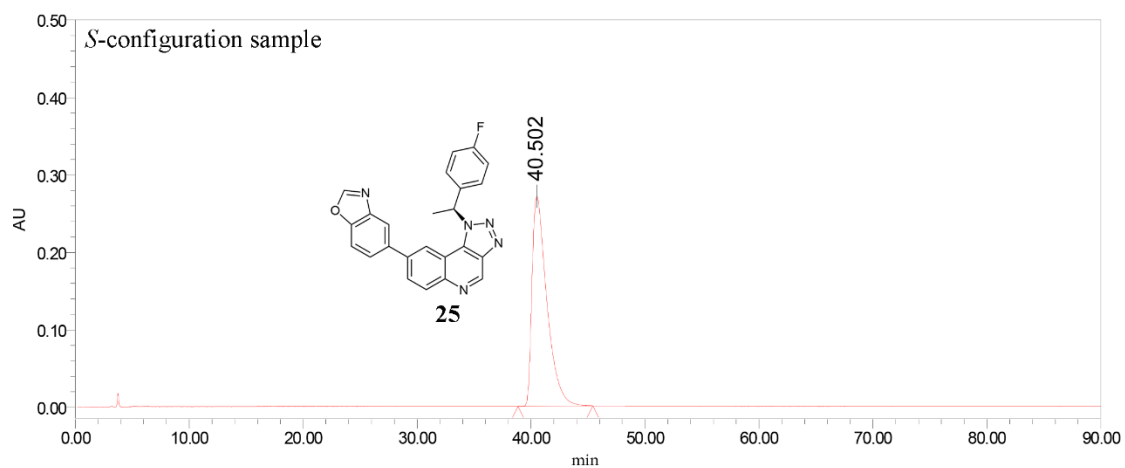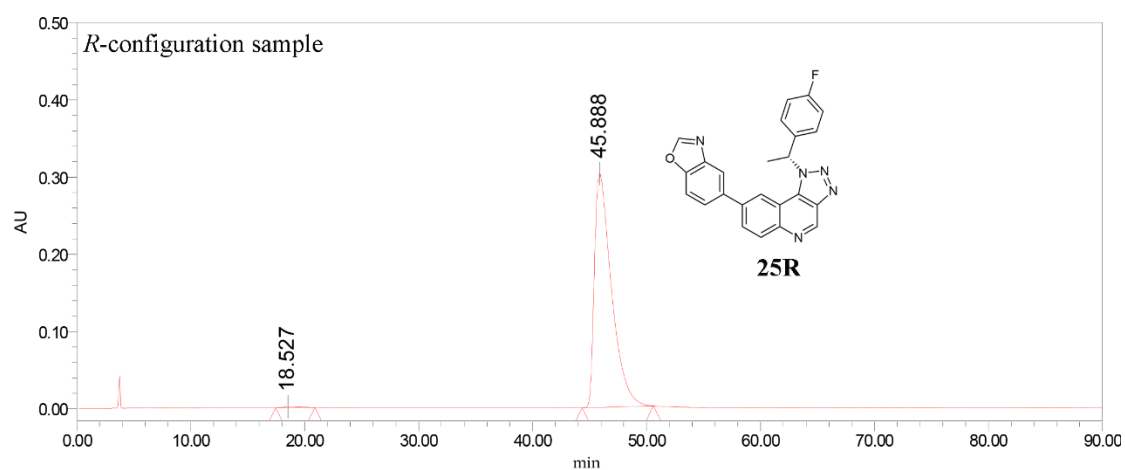

Supplement: Supplementary file 1 [file 8898550]
